# Supplementary material for: Phosphine-free Ru(ii)–CNC pincer complexes with mixed protic- and classical-NHCs in the same molecule for hydrogen production via oxidant-free benzyl alcohol dehydrogenation to benzoic acids
Source: Royal Society of Chemistry journal article supplement (doi:10.1039/d4nj03172e), 2024-01-01
Supplement: d4nj03172e1.pdf [file d4nj03172e1.pdf]

## Supplementary Information

### Phosphine-free Ru(II)-CNC pincer complexes with mixed protic- and classical-NHCs in the same molecule for hydrogen production via oxidant-free benzyl alcohol dehydrogenation to benzoic acids

Navdeep Srivastava, Rohitash Meena, Amrendra K. Singh\*

Department of Chemistry, Indian Institute of Technology Indore,

Simrol, Indore 453552, India

#### Table of Contents

| S. No. | Contents                                                                                      | Page No. |
|--------|-----------------------------------------------------------------------------------------------|----------|
| 1.     | $^1\text{H}$ , $^{13}\text{C}\{^1\text{H}\}$ of L1·HI                                         | S3       |
| 2.     | ESI-MS, HRMS of L2·HI                                                                         | S4-S5    |
| 3.     | $^1\text{H}$ , $^{13}\text{C}\{^1\text{H}\}$ NMR of L2·HBr ligand.                            | S6       |
| 4.     | ESI-MS, HRMS of complex 3                                                                     | S7-S8    |
| 5.     | $^1\text{H}$ , $^{31}\text{P}\{^1\text{H}\}$ , $^{13}\text{C}\{^1\text{H}\}$ NMR of complex 3 | S9-S10   |
| 6.     | ESI-MS, HRMS of complex 4                                                                     | S11-S12  |
| 7.     | $^1\text{H}$ , $^{31}\text{P}\{^1\text{H}\}$ , $^{13}\text{C}\{^1\text{H}\}$ NMR of complex 4 | S13-S14  |
| 8.     | ESI-MS, HRMS of complex 5                                                                     | S15-S16  |
| 9.     | $^1\text{H}$ , $^{31}\text{P}\{^1\text{H}\}$ , $^{13}\text{C}\{^1\text{H}\}$ NMR of complex 5 | S17-S18  |
| 10.    | ESI-MS, HRMS of complex 6                                                                     | S19-S20  |
| 11.    | $^1\text{H}$ , $^{31}\text{P}\{^1\text{H}\}$ , $^{13}\text{C}\{^1\text{H}\}$ NMR of complex 6 | S21-S22  |
| 12.    | Crystal data and structure refinement parameters of complex 6                                 | S23      |
| 13.    | Selected bond lengths and bond angles of complex 6                                            | S24      |

|            |                                                                   |         |
|------------|-------------------------------------------------------------------|---------|
| <b>14.</b> | Comparative study for catalytic dehydrogenation of benzyl alcohol | S25-S26 |
| <b>15.</b> | Mechanistic Investigation                                         | S27-S34 |
| <b>16.</b> | NMR of carboxylic acid products after dehydrogenation of alcohol  | S35-S38 |
| <b>17.</b> | NMR Spectra of carboxylic acid products                           | S39-S60 |

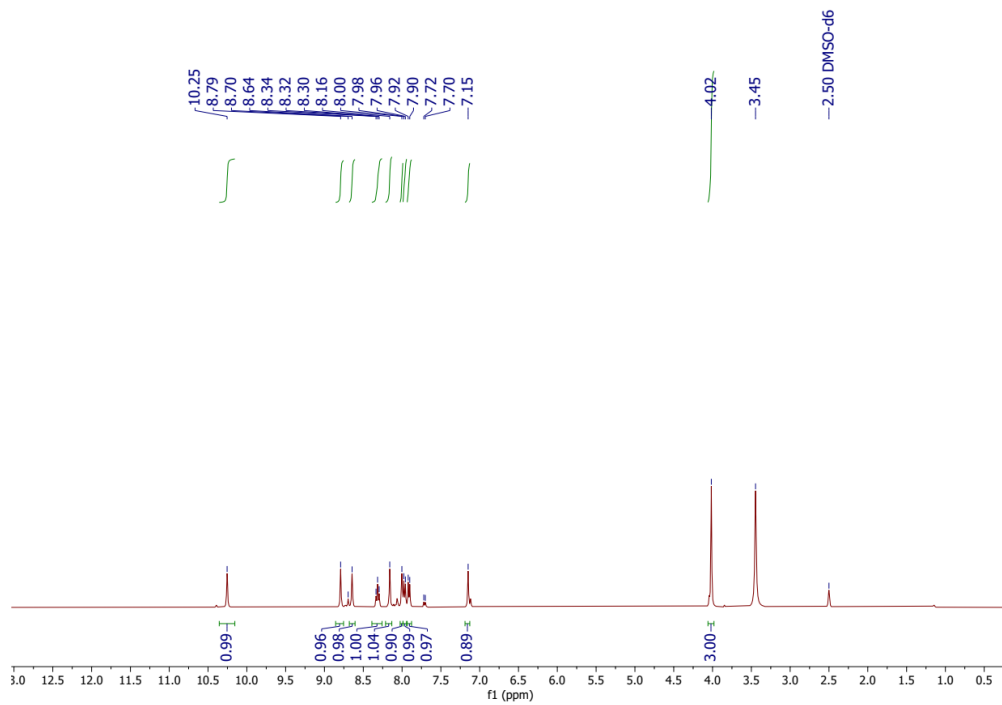

**Figure S1.**  $^1\text{H}$  NMR spectrum of  $\text{L}^1\cdot\text{HI}$ .

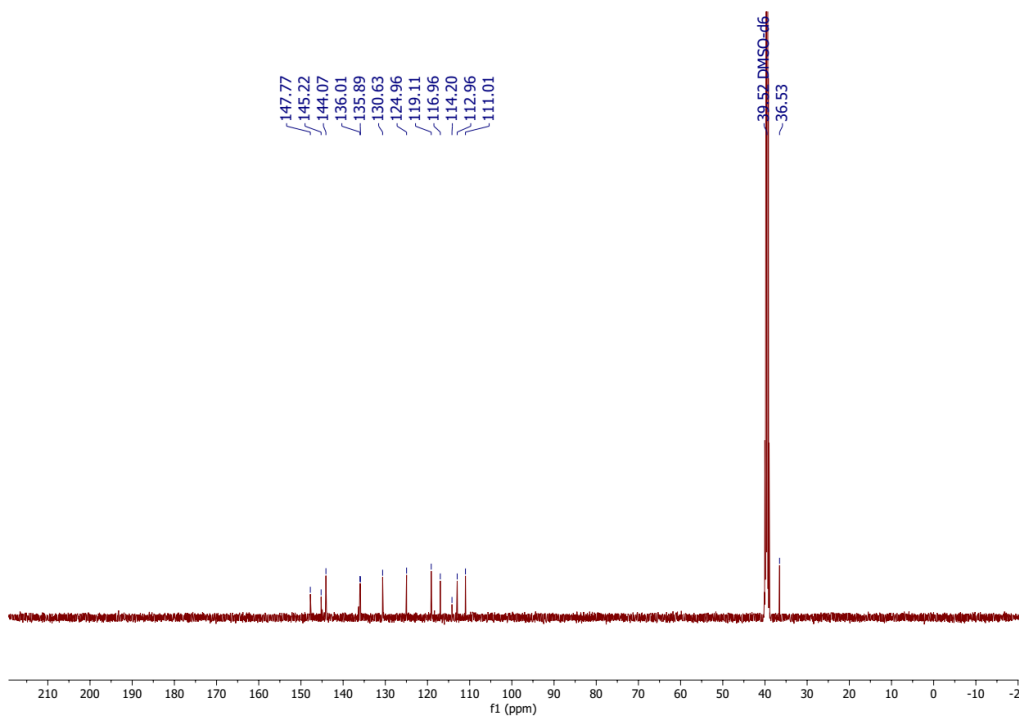

**Figure S2.**  $^{13}\text{C}\{^1\text{H}\}$  NMR spectrum of  $\text{L}^1\cdot\text{HI}$ .

## Generic Display Report

### Analysis Info

Analysis Name E:\Latest Data\LCMS\m chem aks-ns-281\_RC1\_01\_2416.d  
Method 8. LCMS tune wide MeOH.m  
Sample Name m chem aks-ns-281  
Comment

Acquisition Date 1/11/2021 7:11:27 PM

Operator IIT Indore  
Instrument micrOTOF-Q

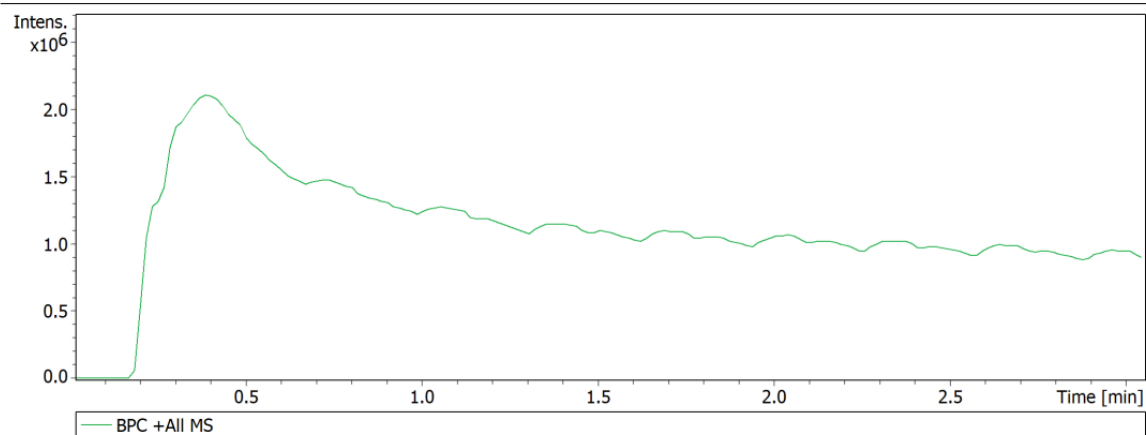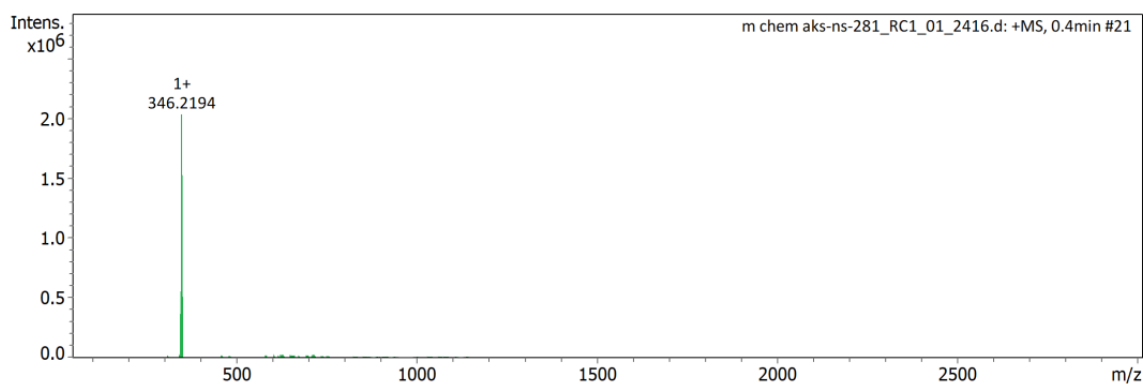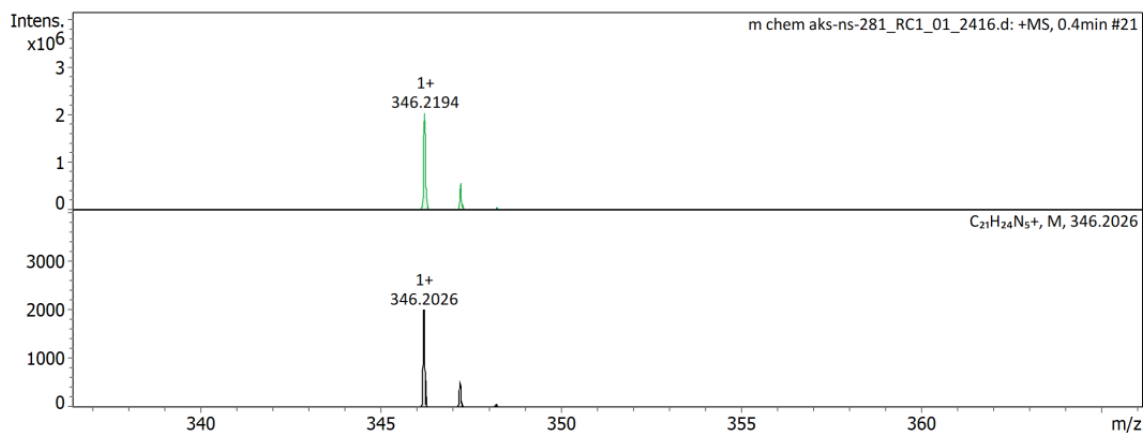

**Figure S3** ESI-MS of L2·HBr ligand.

# Generic Display Report

## Analysis Info

|               |                                                                  |                  |                      |
|---------------|------------------------------------------------------------------|------------------|----------------------|
| Analysis Name | E:\navdeep data\navdeep01\Mass\m chem aks-ns-199-r_RB7_01_6071.d | Acquisition Date | 9/24/2019 1:12:09 PM |
| Method        | 7. lcms tune low meoh.m                                          | Operator         | Ghanashyam Bhavsar   |
| Sample Name   | m chem aks-ns-199-r                                              | Instrument       | micrOTOF-Q II        |
| Comment       |                                                                  |                  |                      |

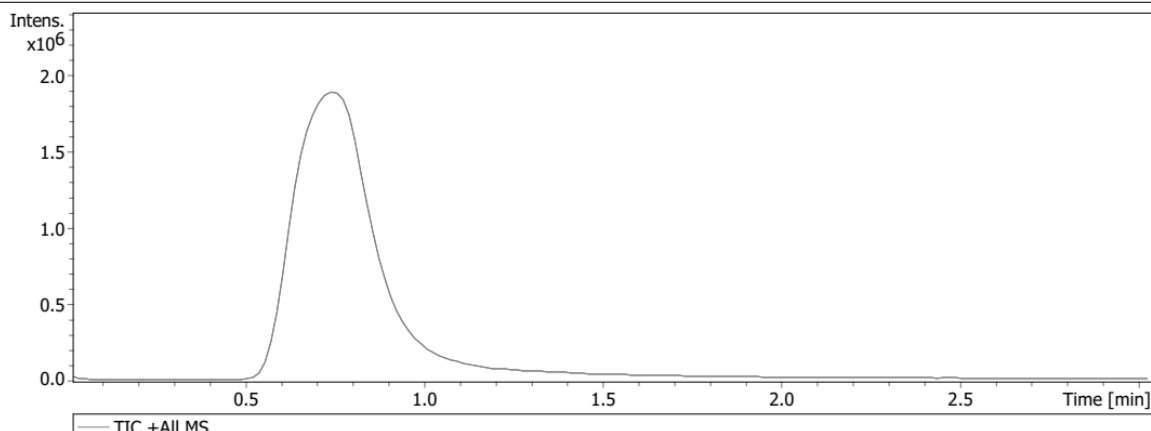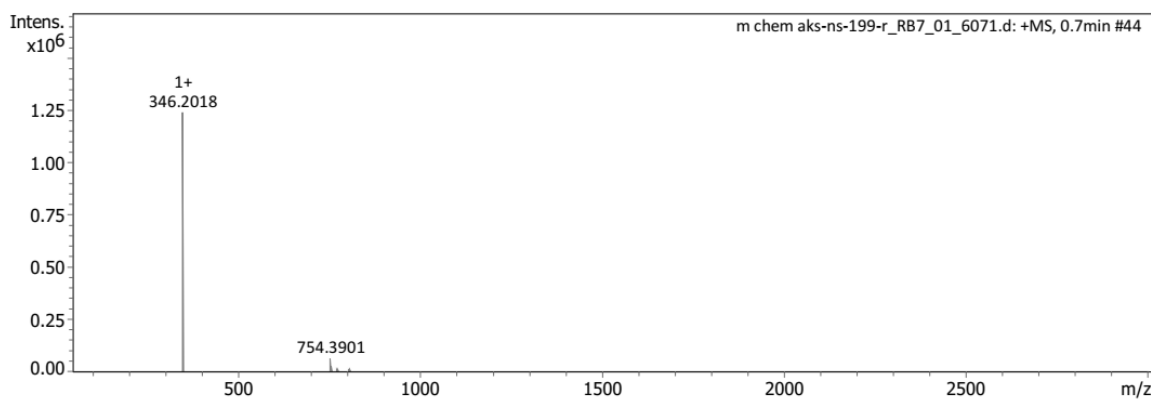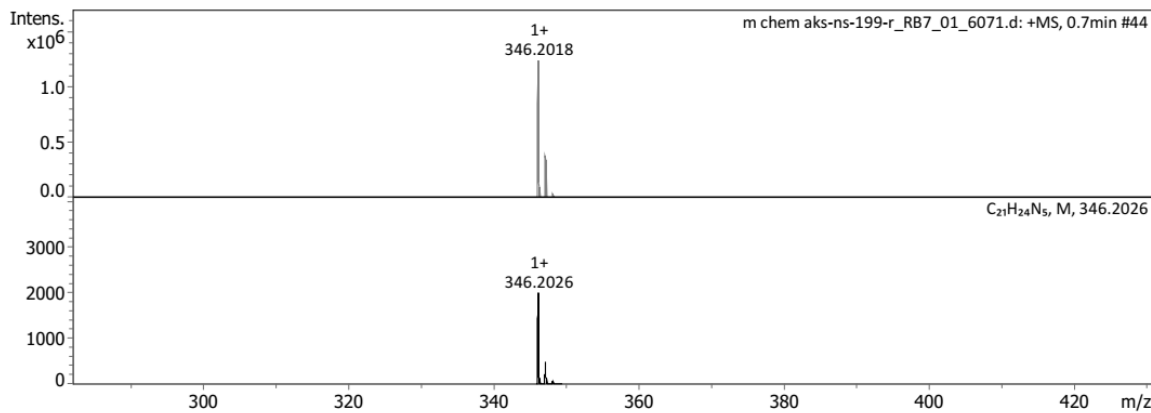

**Figure S4.** HRMS of L2·HBr ligand.

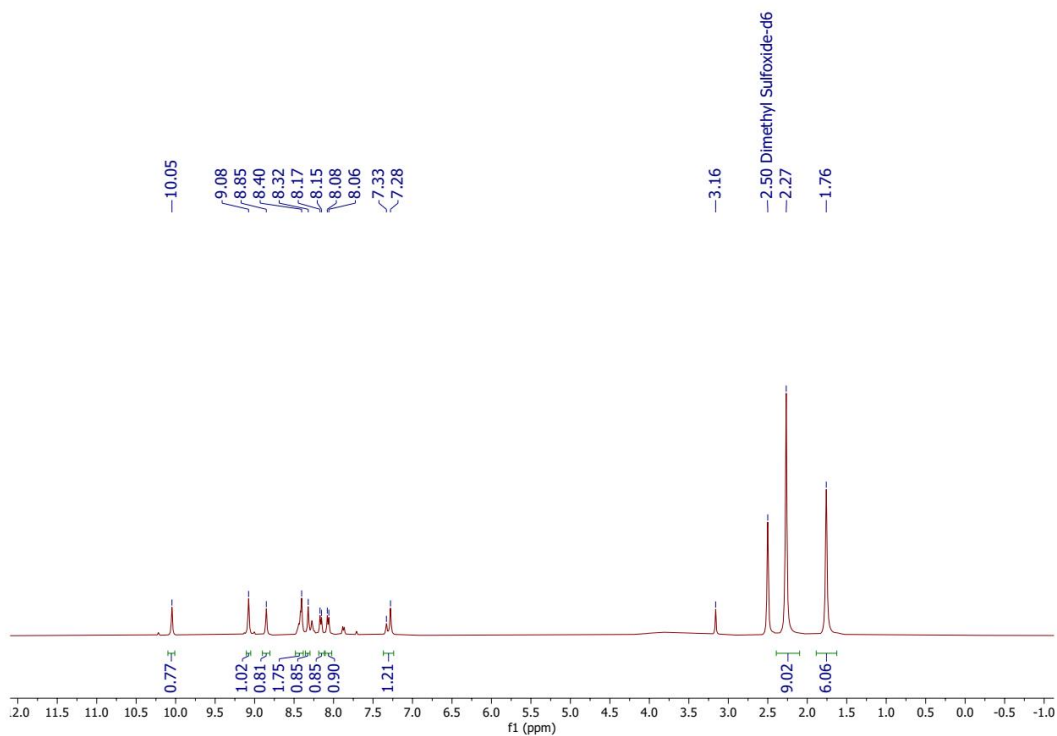

Figure S5.  $^1\text{H}$  NMR of L2·HBr ligand.

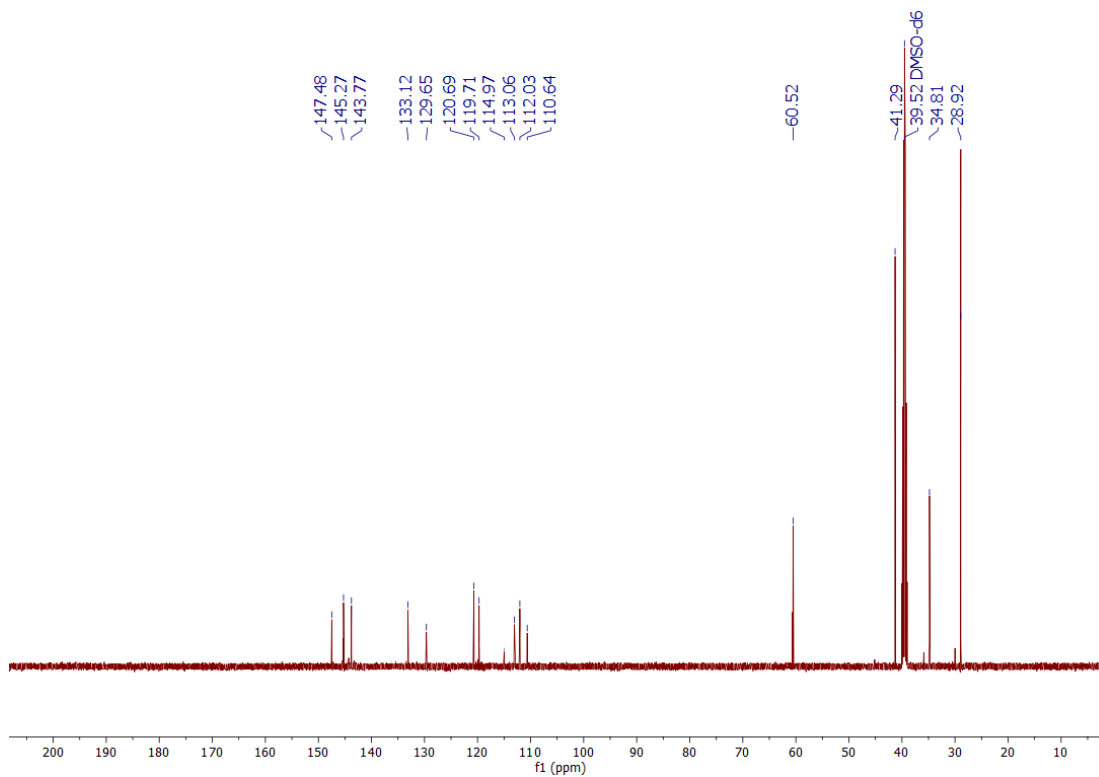

Figure S6.  $^{13}\text{C}\{^1\text{H}\}$  NMR of L2·HBr ligand.

# Generic Display Report

## Analysis Info

Analysis Name E:\Latest Data\LCMS\m chem aks-ns-2-149\_GA3\_01\_5744.d  
Method 8. LCMS tune wide MeOH.m  
Sample Name m chem aks-ns-2-149  
Comment

Acquisition Date 6/22/2021 6:35:07 PM  
Operator IIT Indore  
Instrument micrOTOF-Q

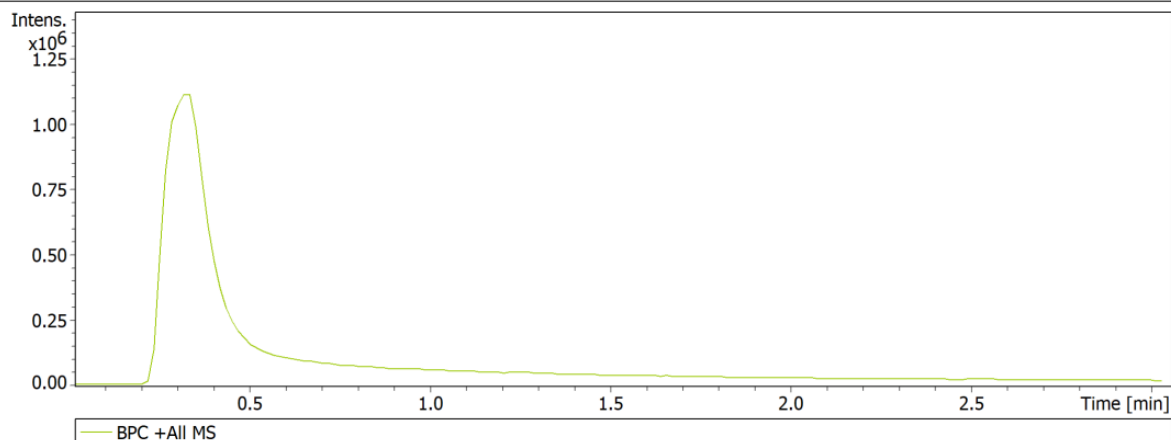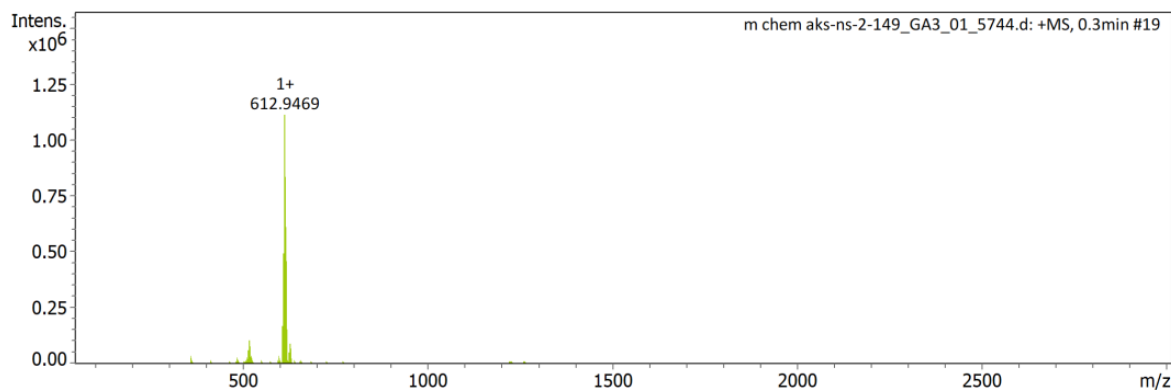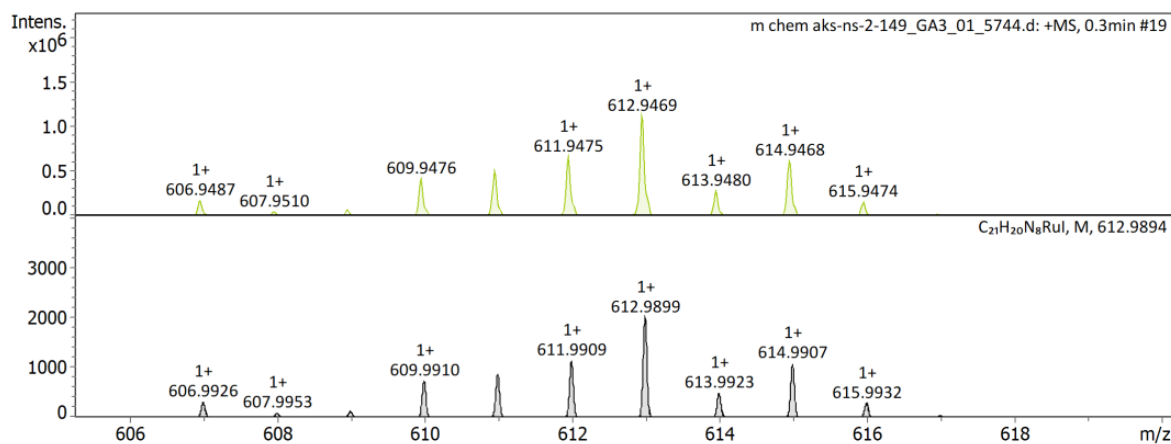

Figure S7. ESI-MS of complex 3.

# Generic Display Report

## Analysis Info

Analysis Name E:\Latest Data\LCMS\h chem aks-ns-2-149\_RA3\_01\_6014.d  
Method 8: LCMS tune wide MeOH.m  
Sample Name h chem aks-ns-2-149  
Comment

Acquisition Date 6/30/2021 8:50:02 PM  
Operator IIT Indore  
Instrument micrOTOF-Q

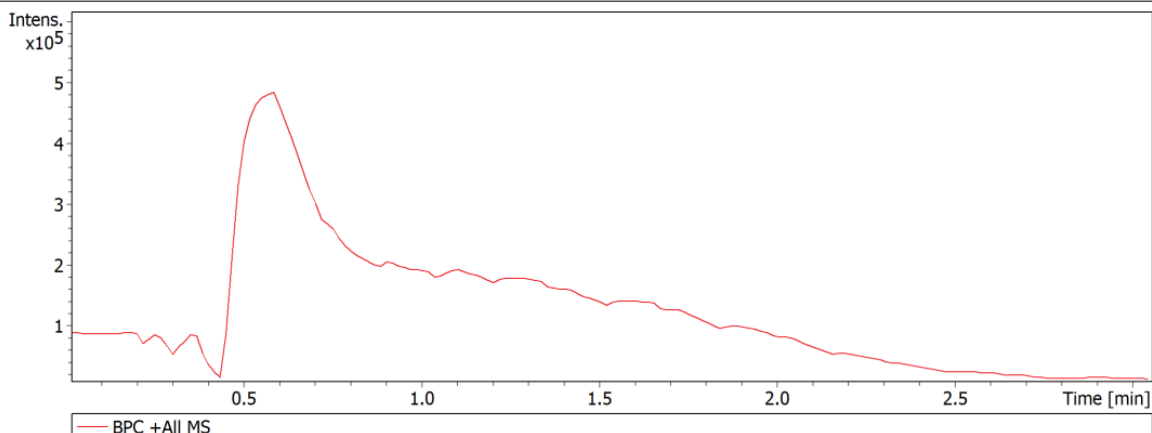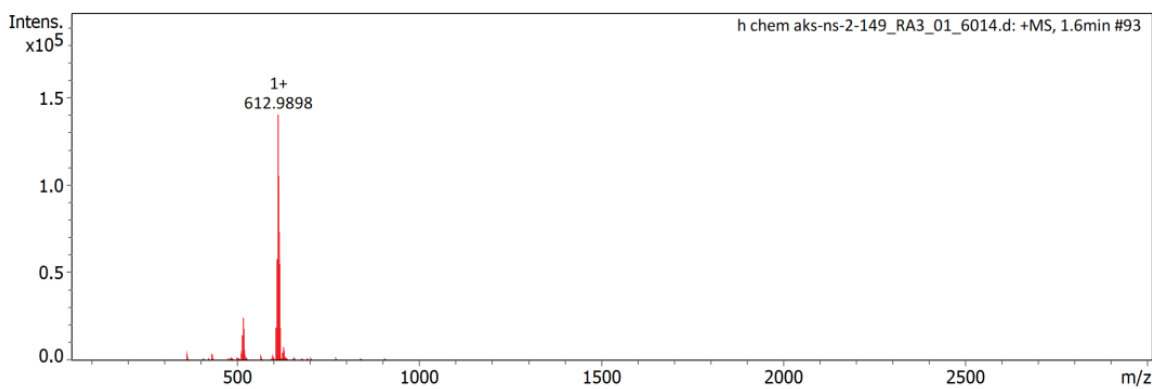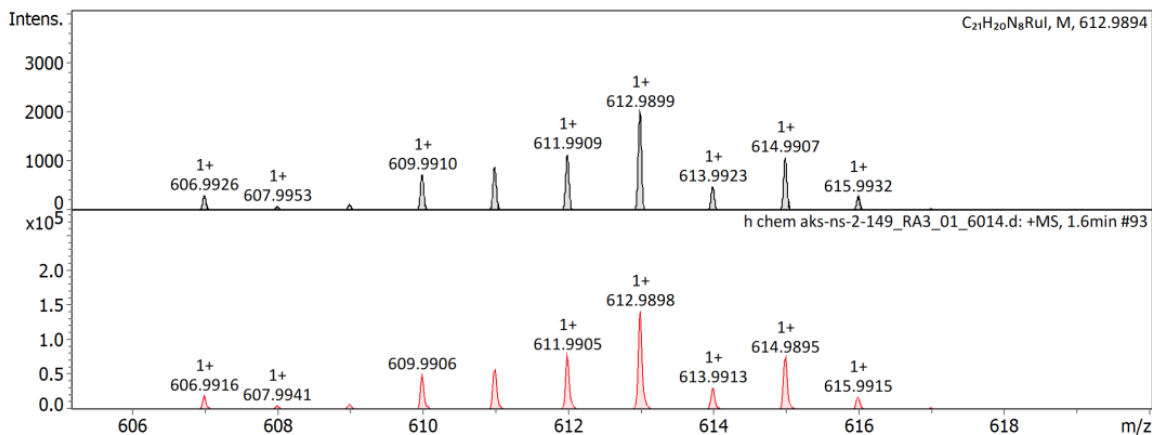

**Figure S8. HRMS of complex 3.**



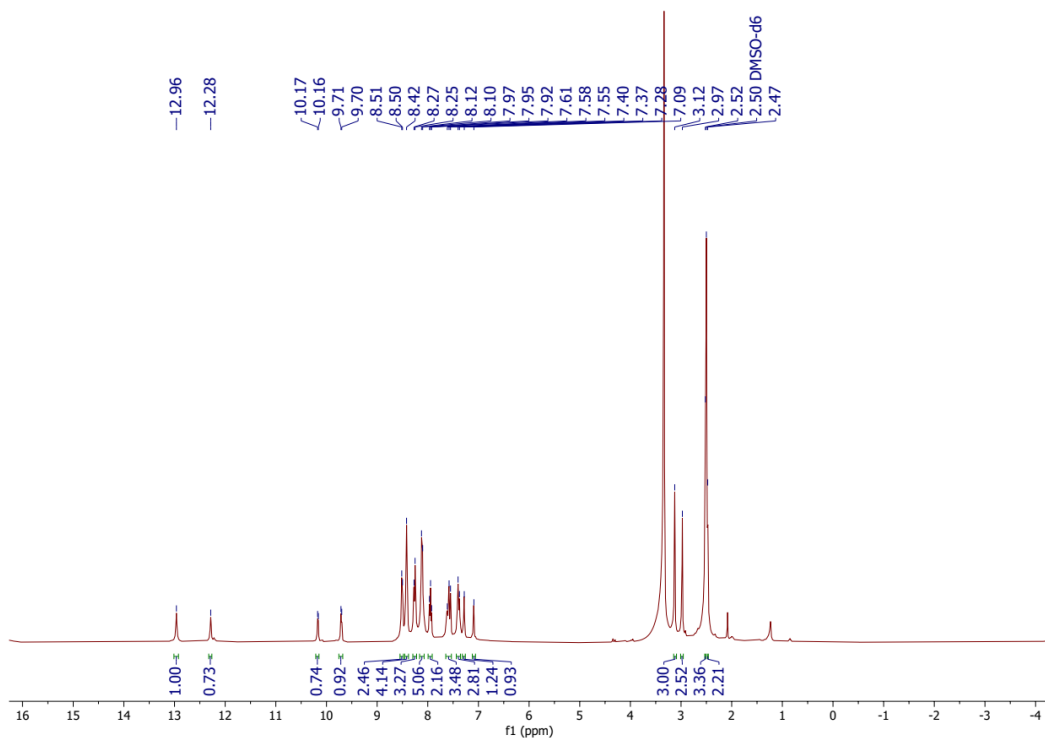

Figure S9.  $^1\text{H}$  NMR of complex **3**

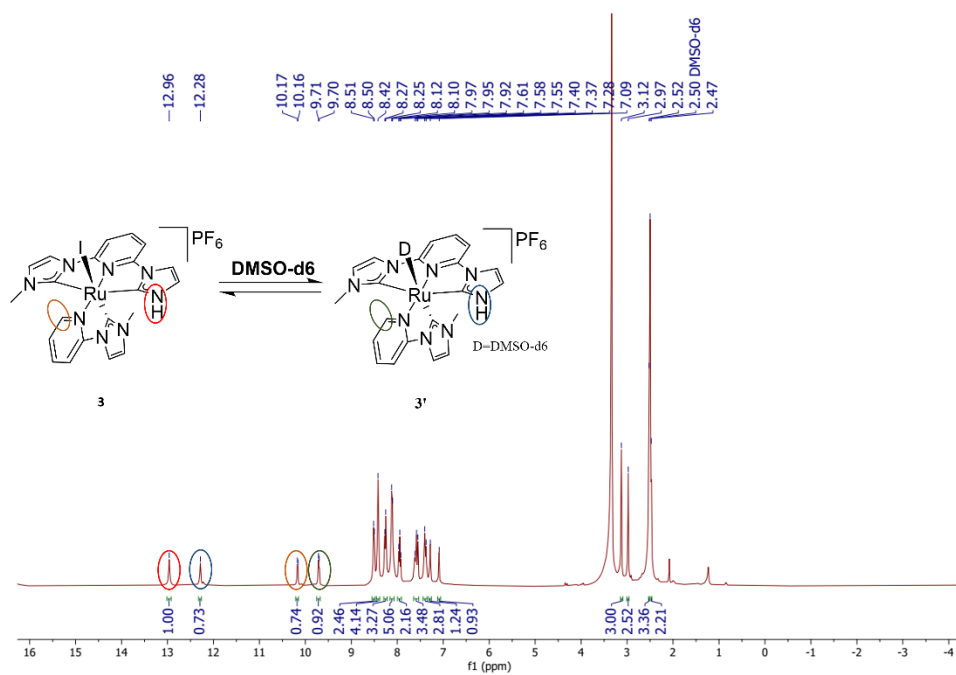

Figure S10. Equilibrium between **3** and **3'** in the NMR tube in  $\text{dmsO-d}_6$ .

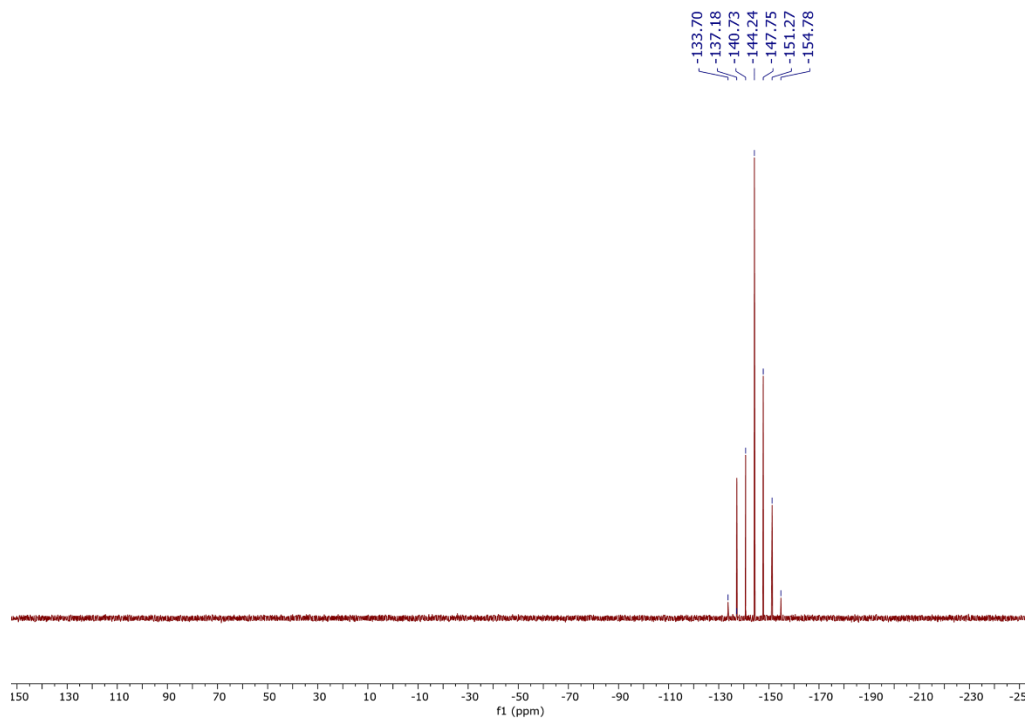

**Figure S11.**  $^{31}\text{P}\{^1\text{H}\}$  NMR of complex **3**

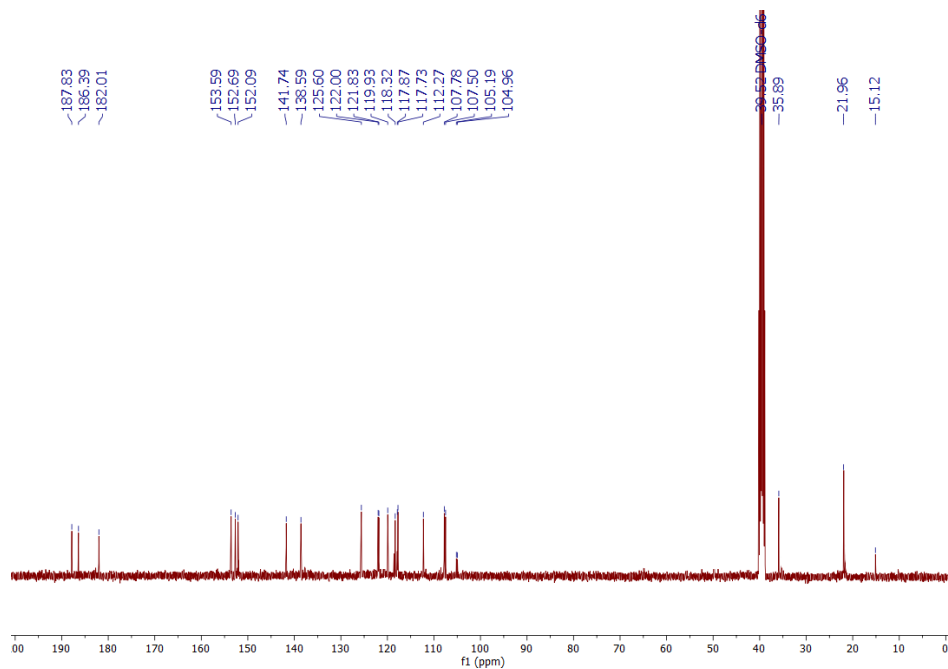

**Figure S12.**  $^{13}\text{C}\{^1\text{H}\}$  NMR of complex **3**

# Generic Display Report

## Analysis Info

Analysis Name E:\Latest Data\LCMS\m chem aks-ns-2-154-II\_RC2\_01\_6028.d  
Method 8. LCMS tune wide MeOH.m  
Sample Name m chem aks-ns-2-154-II  
Comment

Acquisition Date 6/30/2021 10:18:30 PM  
Operator IIT Indore  
Instrument micrOTOF-Q

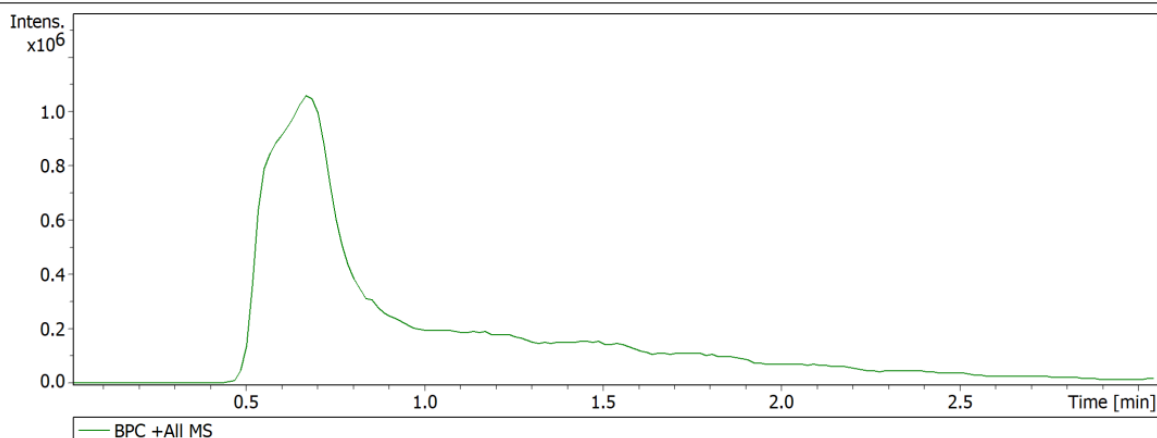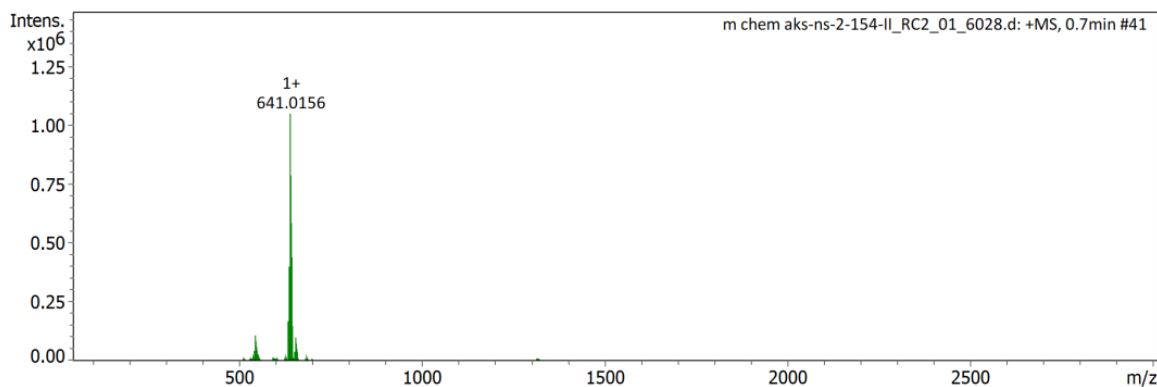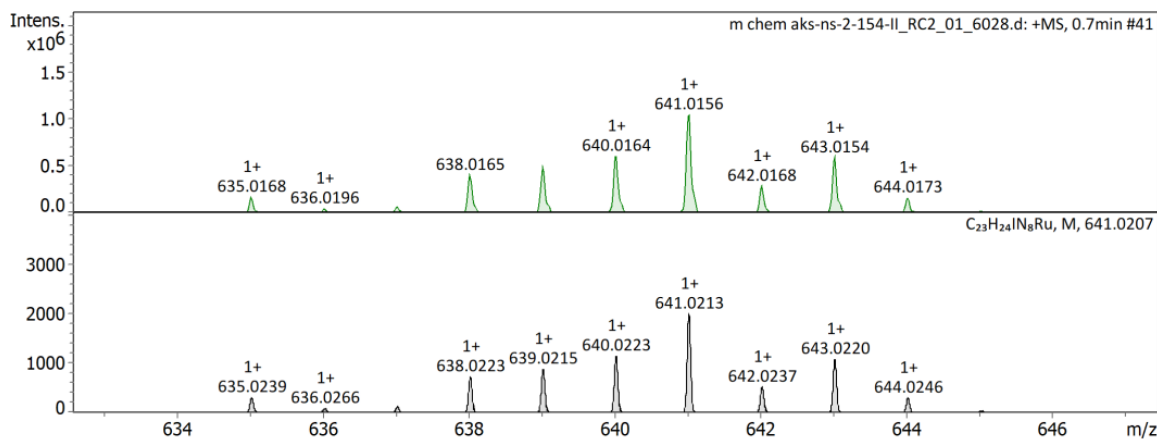

Figure S13. ESI-MS of complex 4

# Generic Display Report

## Analysis Info

Analysis Name E:\Latest Data\LCMS\h chem ns-2-154-1\_RB1\_01\_6015.d  
Method 8. LCMS tune wide MeOH.m  
Sample Name h chem ns-2-154-1  
Comment

Acquisition Date 6/30/2021 9:05:58 PM

Operator IIT Indore  
Instrument micrOTOF-Q

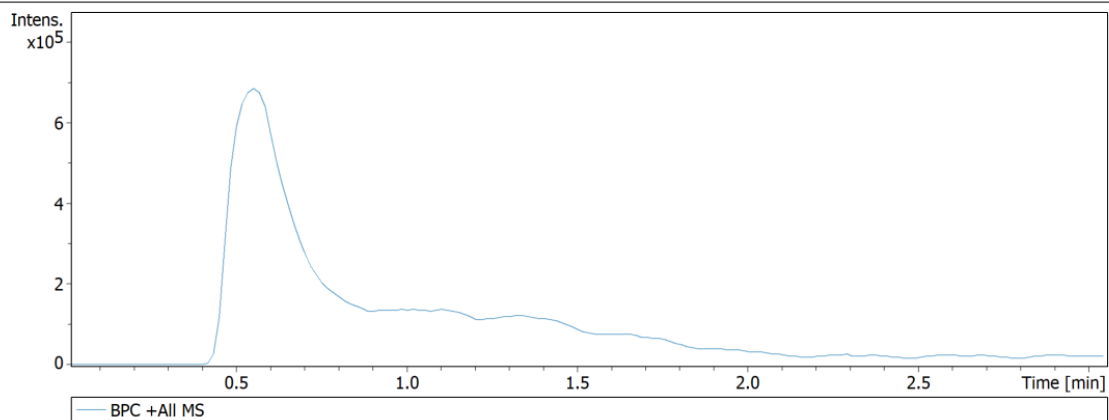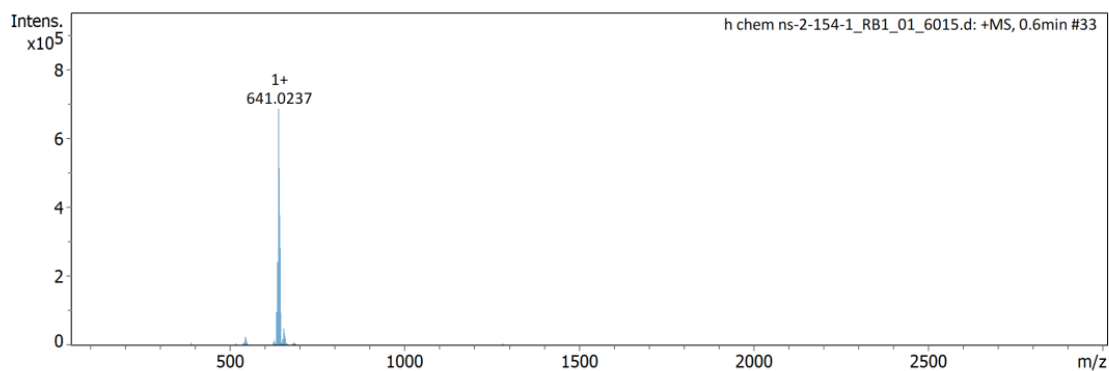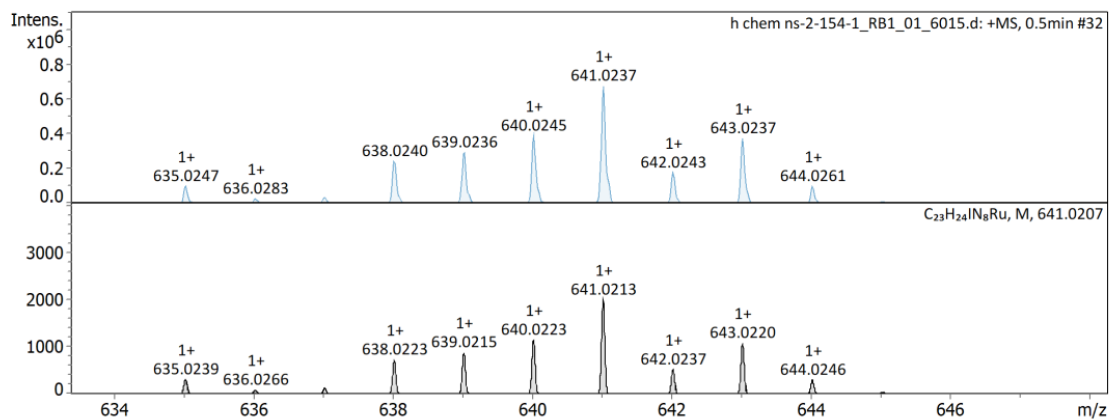

Figure S14. HRMS of complex 4

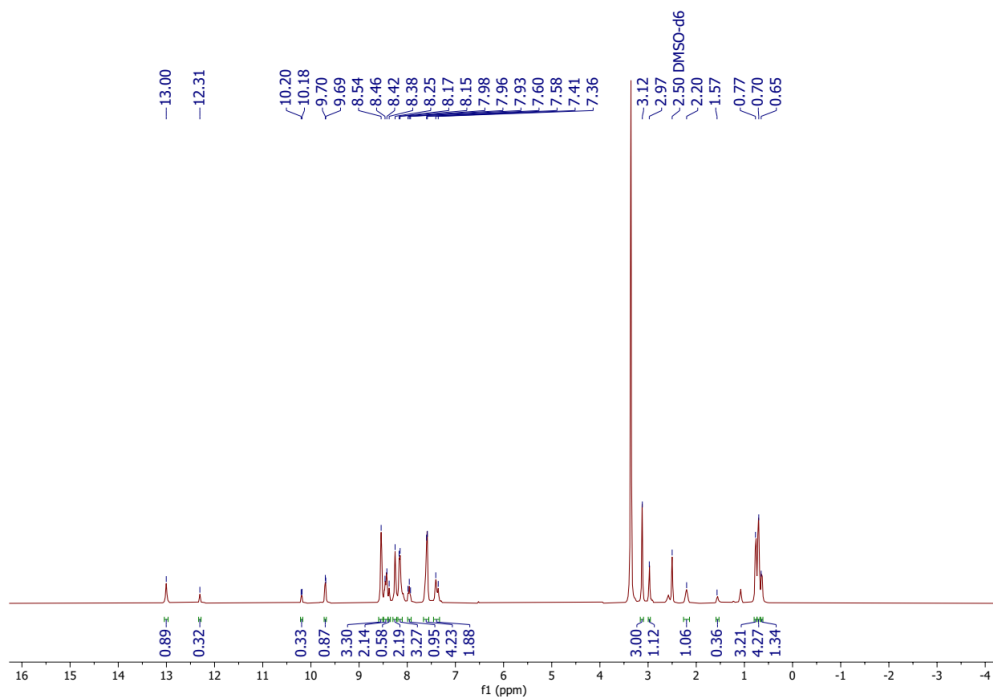

Figure S15.  $^1\text{H}$  NMR of complex 4

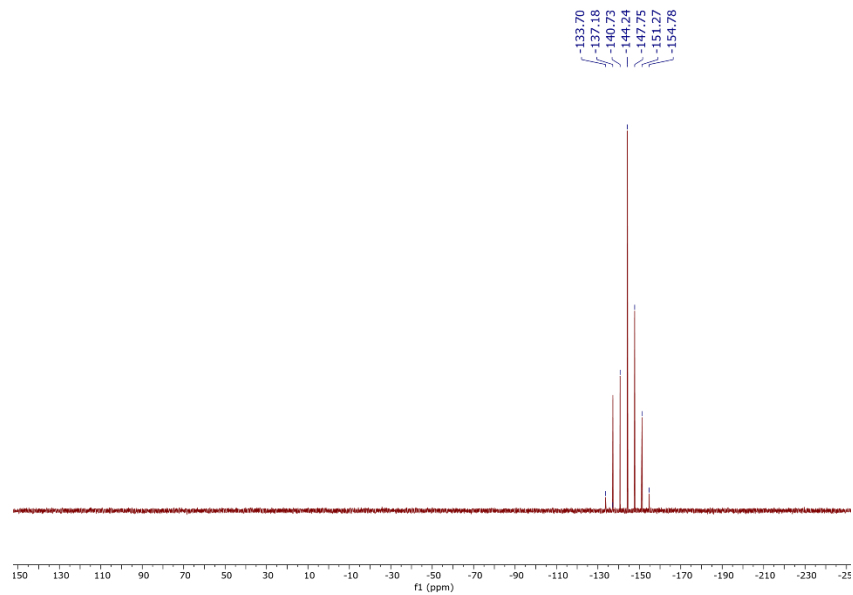

Figure S16.  $^{31}\text{P}\{^1\text{H}\}$  NMR of complex 4

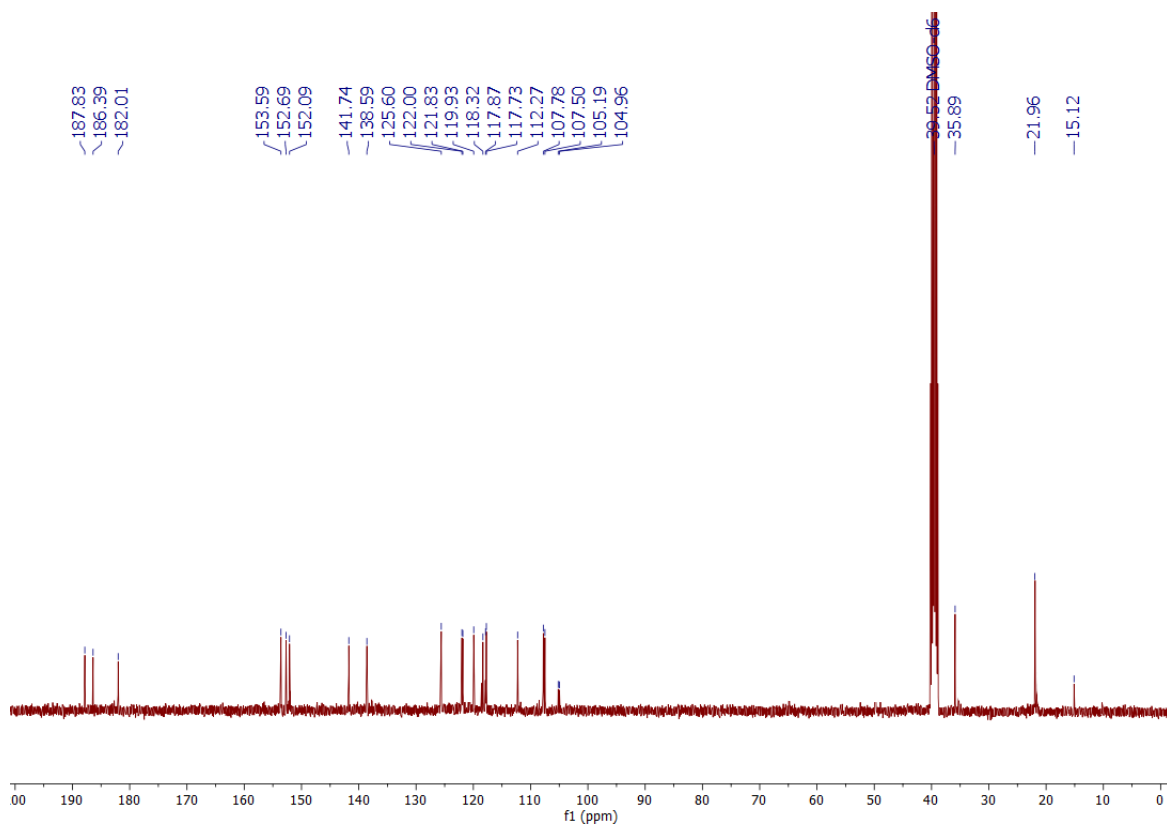

Figure S17.  $^{31}\text{C}\{\text{H}\}$  NMR of complex 4

# Generic Display Report

## Analysis Info

Analysis Name E:\Latest Data\LCMS\m chem aks-ns-2-75b\_RE1\_01\_2230.d  
Method 8. LCMS tune wide MeOH.m  
Sample Name m chem aks-ns-2-75b  
Comment

Acquisition Date 1/4/2021 5:08:21 PM  
Operator IIT Indore  
Instrument micrOTOF-Q

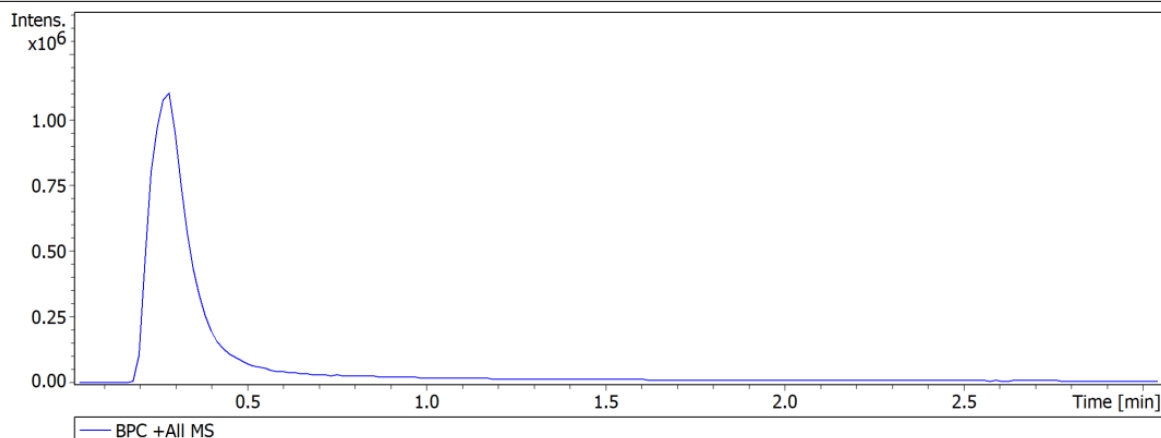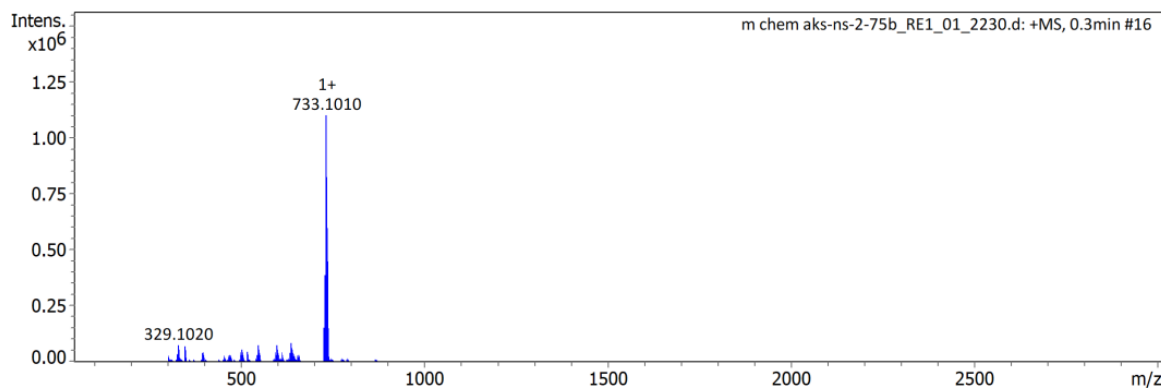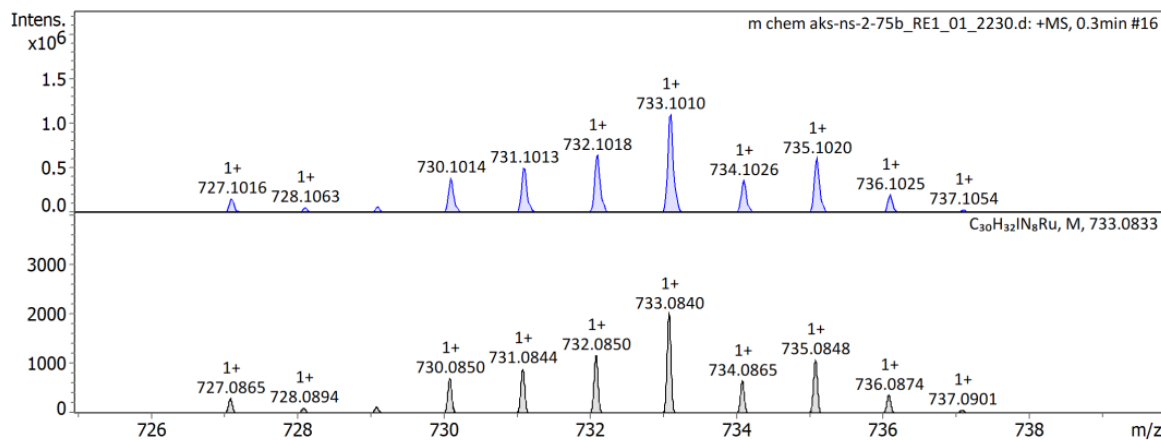

Figure S18. ESI-MS of complex 5

# Generic Display Report

## Analysis Info

Analysis Name E:\Latest Data\LCMS\m chem aks-ns-2-216r\_RE1\_01\_2391.d  
Method 8. LCMS tune wide MeOH.m  
Sample Name m chem aks-ns-2-216r  
Comment

Acquisition Date 1/8/2021 4:43:20 PM  
Operator IIT Indore  
Instrument micrOTOF-Q

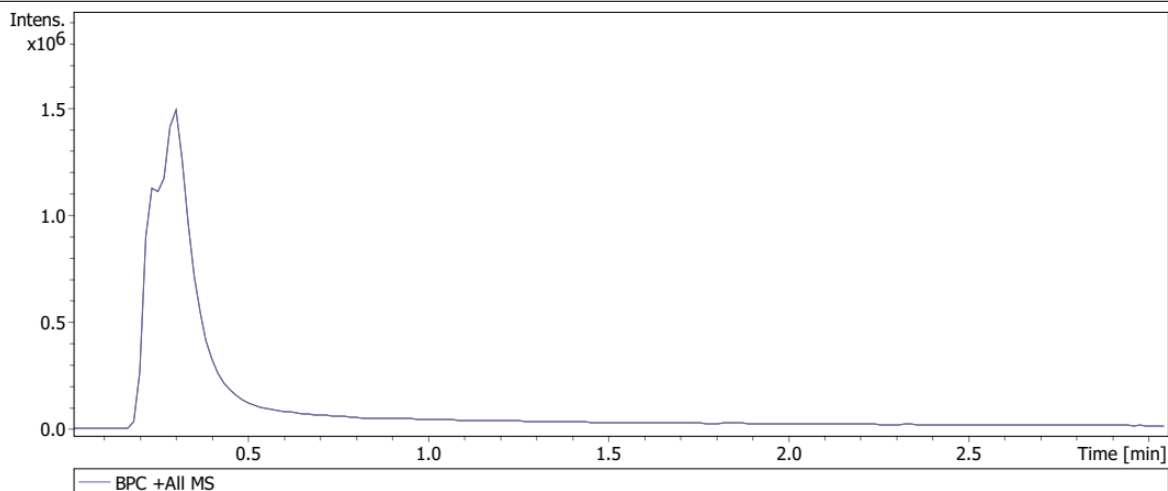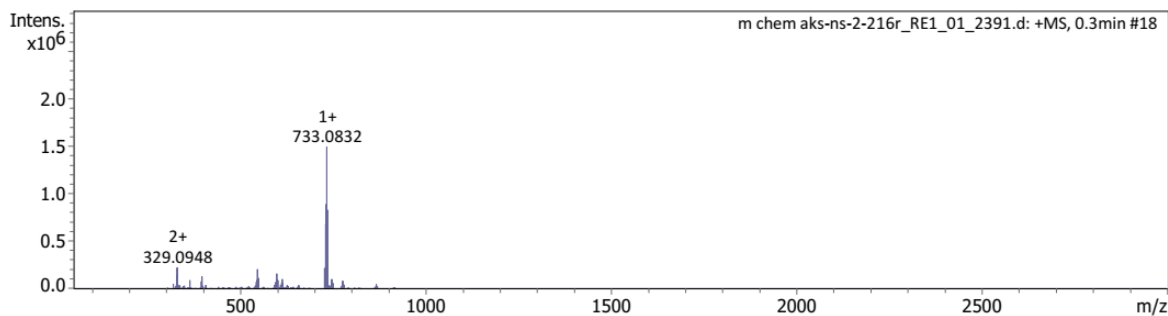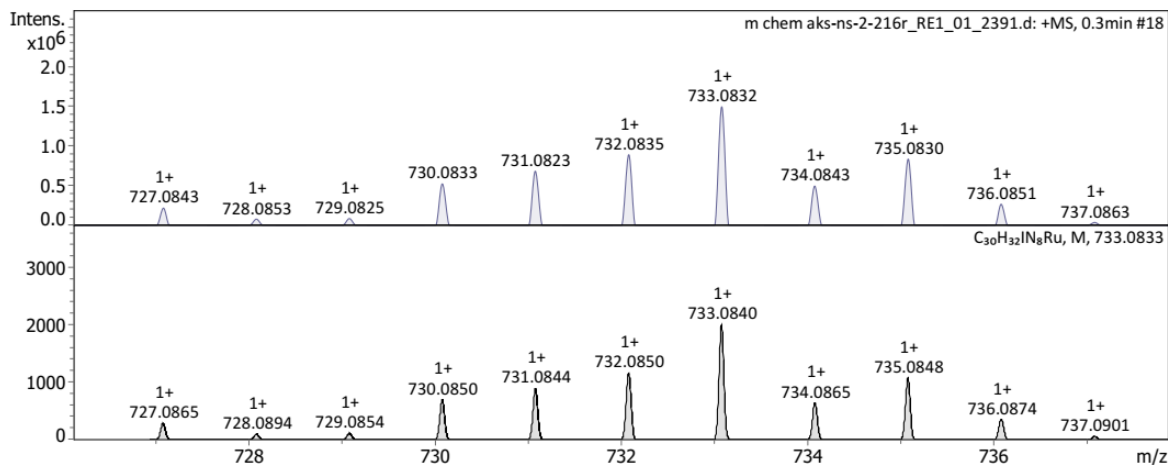

Figure S19. HRMS of complex 5



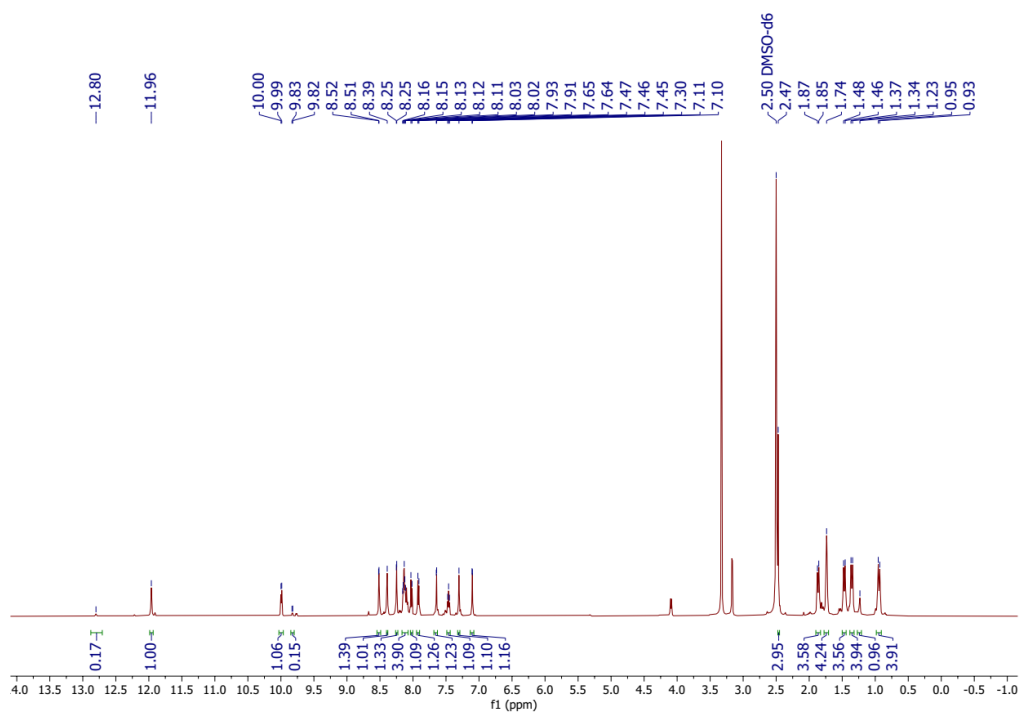

Figure S20. <sup>1</sup>H NMR of complex 5

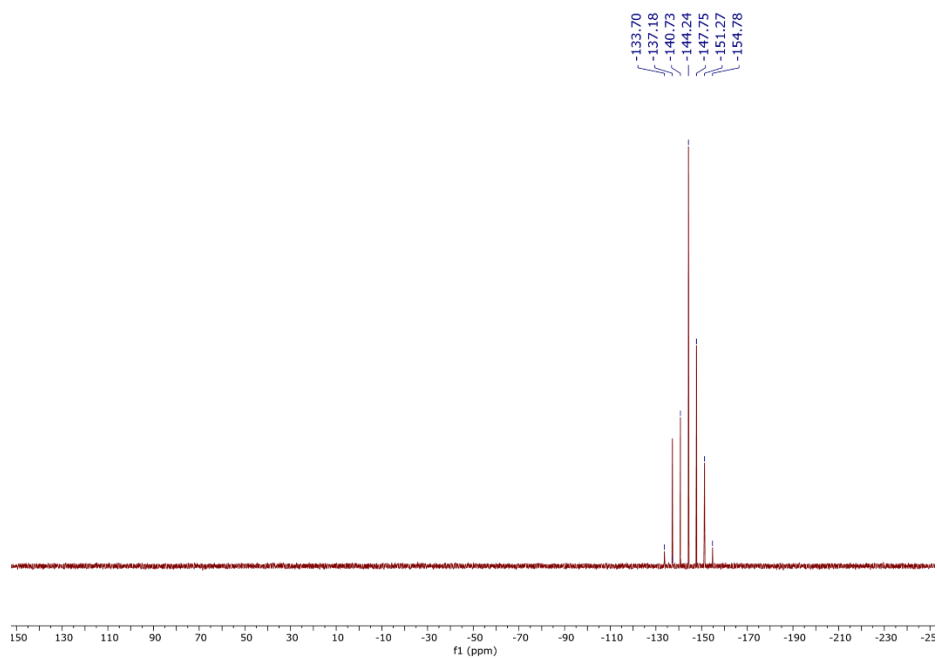

Figure S21. <sup>31</sup>P{<sup>1</sup>H} NMR of complex 5

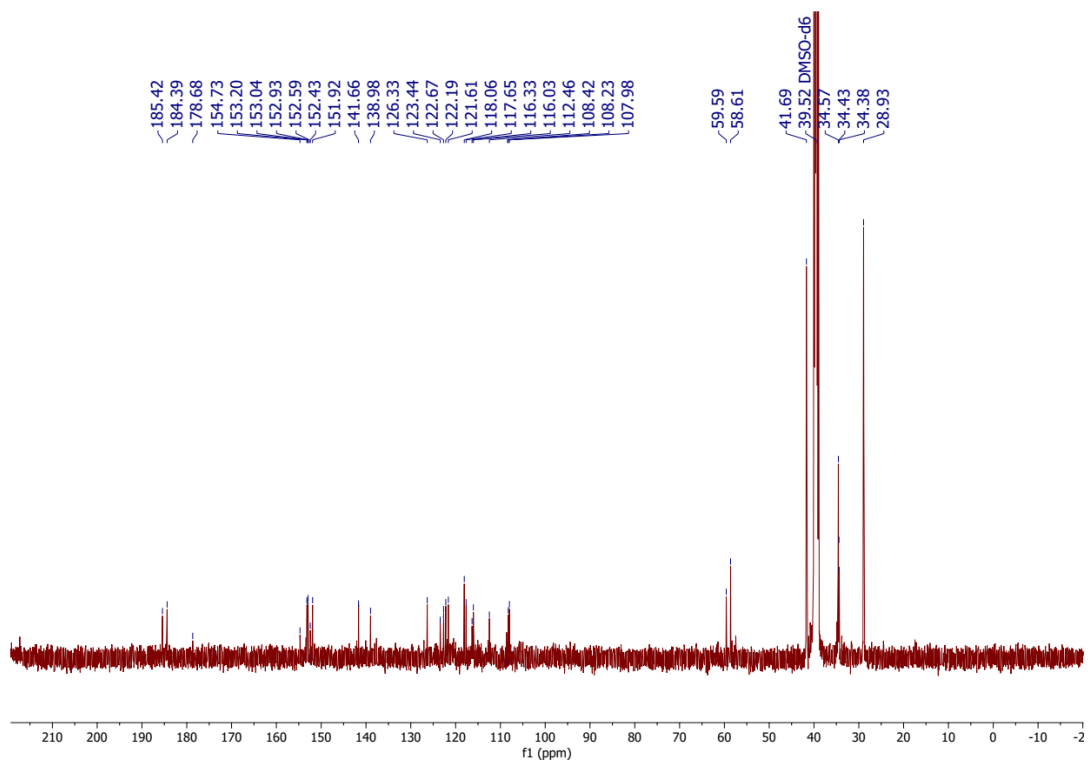

Figure S22.  $^{13}\text{C}\{^1\text{H}\}$  NMR of complex 5

# Generic Display Report

## Analysis Info

Analysis Name  
Method  
Sample Name  
Comment

E:\Latest Data\LCMS\m chem AKS-NS-2-201-2\_RA5\_01\_10951.d  
8. LCMS tune wide MeOH.m  
m chem AKS-NS-2-201-2

Acquisition Date 11/22/2021 1:24:55 PM

Operator IIT Indore  
Instrument micrOTOF-Q

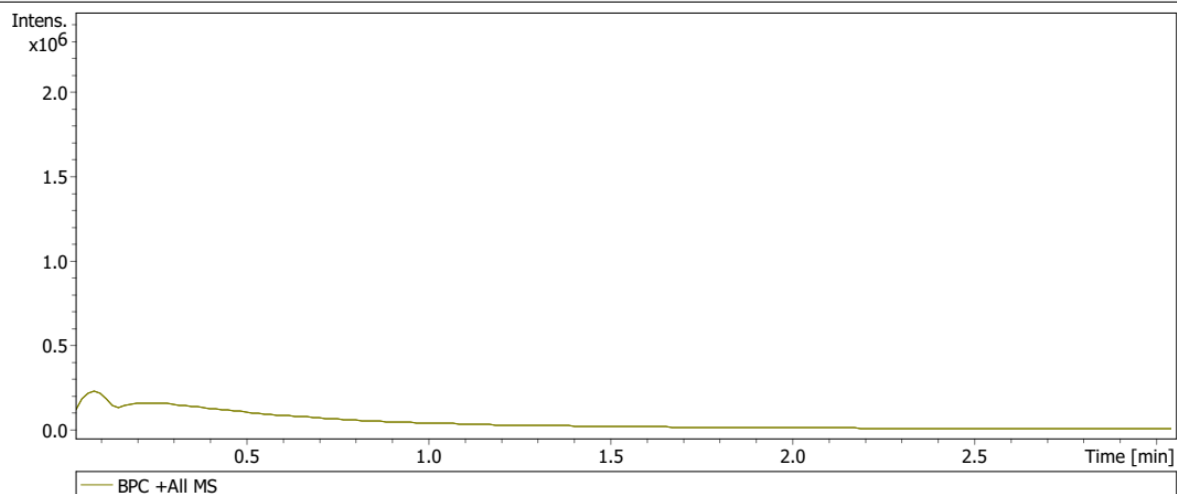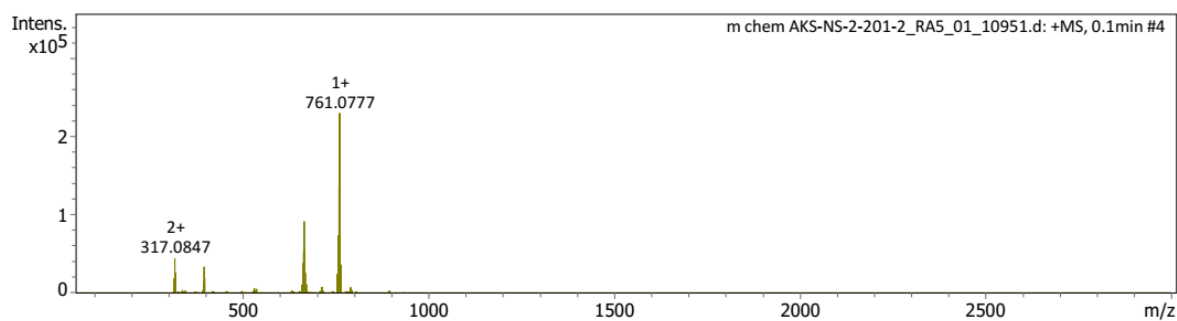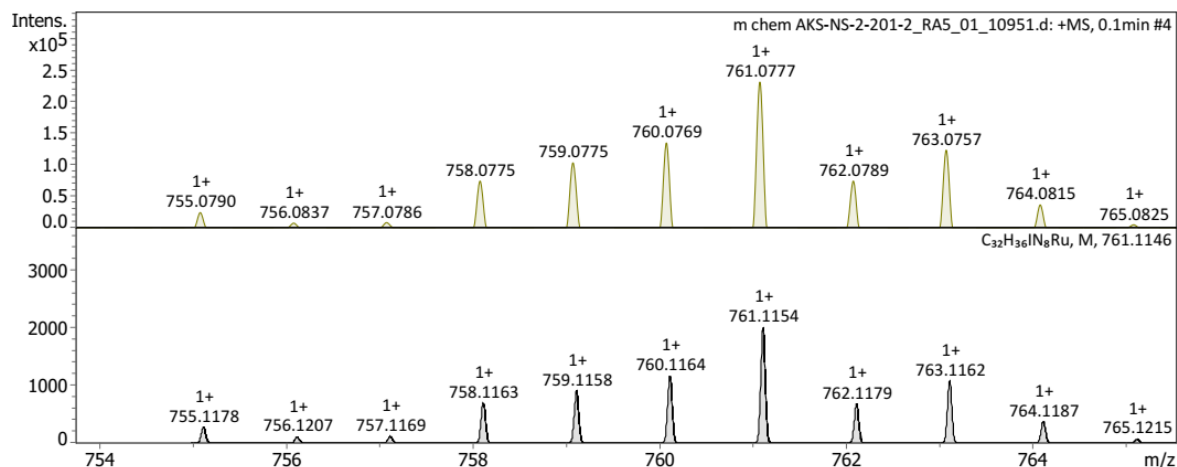

Figure S23. ESI-MS of complex 6

# Generic Display Report

## Analysis Info

Analysis Name E:\Latest Data\LCMS\m chem AKS-NS-2-201-II-CRYSTAL\_RB1\_01\_11760.d  
Method 8. LCMS tune wide MeOH.m  
Sample Name m chem AKS-NS-2-201-II-CRYSTAL  
Comment

Acquisition Date 12/17/2021 11:39:14 AM  
Operator IIT Indore  
Instrument micrOTOF-Q

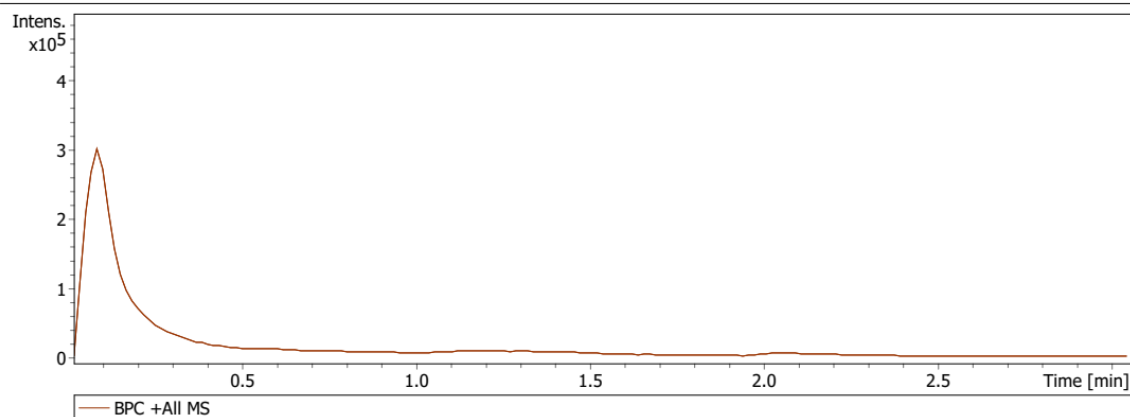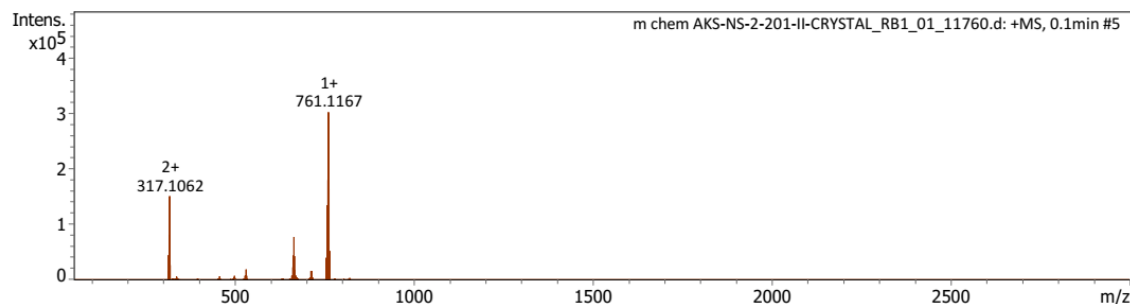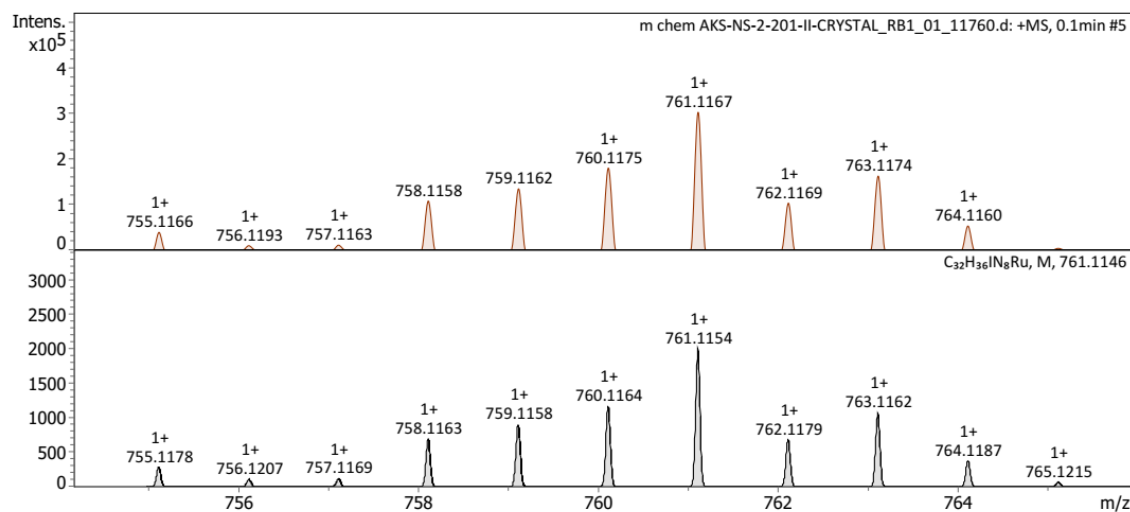

Figure S24. HRMS of complex 6

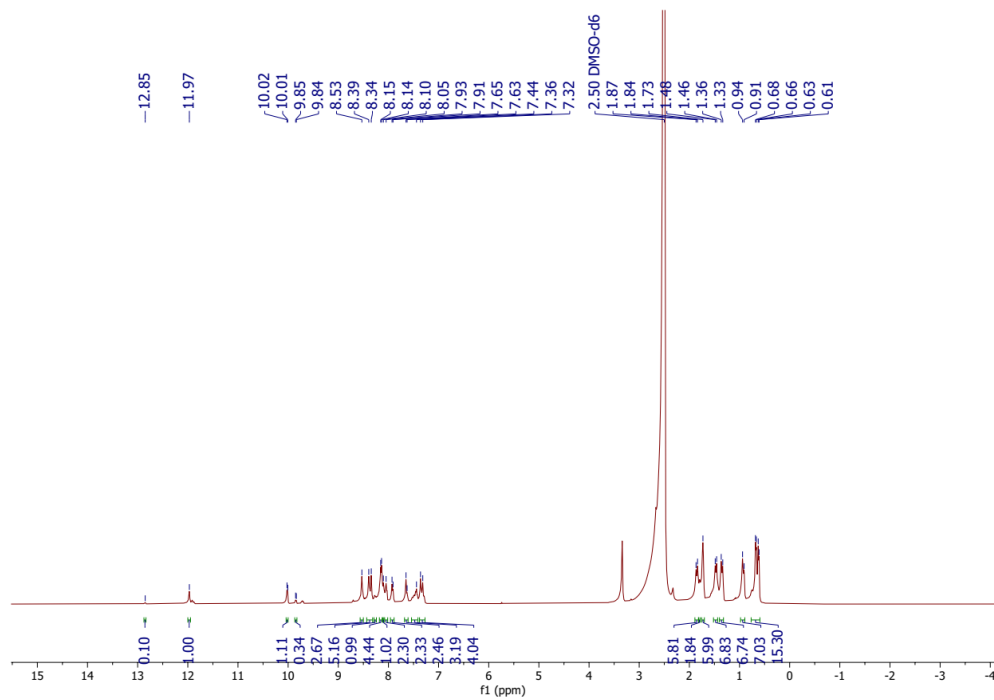

Figure S25.  $^1\text{H}$  NMR of complex 6

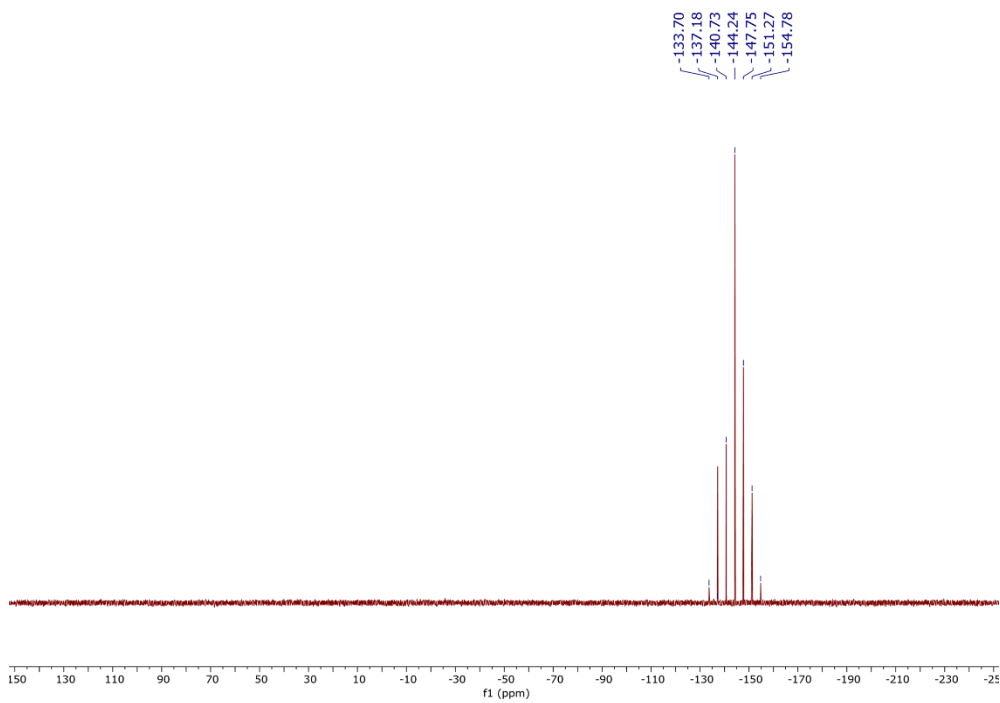

Figure S26.  $^{31}\text{P}\{^1\text{H}\}$  NMR of complex 6

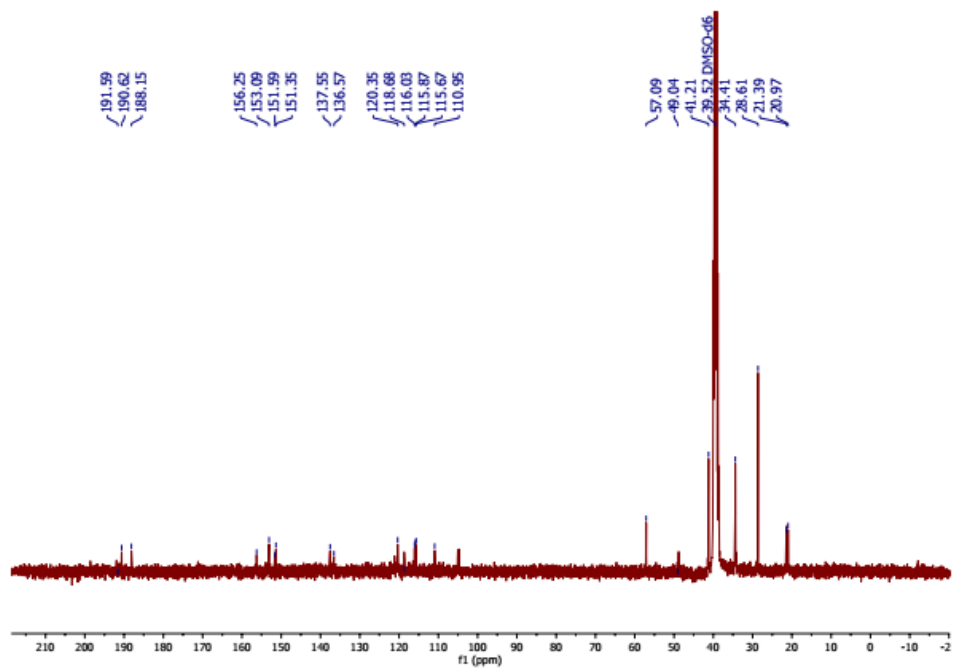

Figure S27.  $^{13}\text{C}\{^1\text{H}\}$  NMR of complex 6

**Table S1.** Crystal data and structure refinement parameters of complex **6**

|                                             |                                                                                                    |
|---------------------------------------------|----------------------------------------------------------------------------------------------------|
| Empirical formula                           | <b>C<sub>33</sub>H<sub>40</sub>Cl<sub>0.14</sub>F<sub>6</sub>I<sub>0.85</sub>N<sub>8</sub>OPRu</b> |
| Formula weight                              | <b>924.41</b>                                                                                      |
| Temperature/K                               | <b>293(2)</b>                                                                                      |
| Crystal system                              | <b>triclinic</b>                                                                                   |
| Space group                                 | <b>P-1</b>                                                                                         |
| a/Å                                         | <b>11.7722(3)</b>                                                                                  |
| b/Å                                         | <b>12.5423(3)</b>                                                                                  |
| c/Å                                         | <b>14.3998(4)</b>                                                                                  |
| α/°                                         | <b>77.402(2)</b>                                                                                   |
| β/°                                         | <b>69.513(2)</b>                                                                                   |
| γ/°                                         | <b>71.130(2)</b>                                                                                   |
| Volume/Å <sup>3</sup>                       | <b>1871.37(9)</b>                                                                                  |
| Z                                           | <b>2</b>                                                                                           |
| ρ <sub>calc</sub> /cm <sup>3</sup>          | <b>1.641</b>                                                                                       |
| μ/mm <sup>-1</sup>                          | <b>1.246</b>                                                                                       |
| F(000)                                      | <b>926.0</b>                                                                                       |
| Crystal size/mm <sup>3</sup>                | <b>0.25 × 0.2 × 0.18</b>                                                                           |
| Radiation                                   | <b>MoKα (λ = 0.71073)</b>                                                                          |
| 2θ range for data collection/°              | <b>6.632 to 58.01</b>                                                                              |
| Index ranges                                | <b>-15 ≤ h ≤ 15, -16 ≤ k ≤ 16, -18 ≤ l ≤ 14</b>                                                    |
| Reflections collected                       | <b>20121</b>                                                                                       |
| Independent reflections                     | <b>8714 [R<sub>int</sub> = 0.0484, R<sub>sigma</sub> = 0.0653]</b>                                 |
| Data/restraints/parameters                  | <b>8714/1/474</b>                                                                                  |
| Goodness-of-fit on F <sup>2</sup>           | <b>1.044</b>                                                                                       |
| Final R indexes [I ≥ 2σ (I)]                | <b>R<sub>1</sub> = 0.0477, wR<sub>2</sub> = 0.1048</b>                                             |
| Final R indexes [all data]                  | <b>R<sub>1</sub> = 0.0712, wR<sub>2</sub> = 0.1189</b>                                             |
| Largest diff. peak/hole / e Å <sup>-3</sup> | <b>0.77/-0.67</b>                                                                                  |

**Table S2.** Selected bond lengths and bond angles of complex **6**

| <b>Complex</b> | <b>Bond lengths (Å)</b> |           | <b>Bond Angles (°)</b> |            |
|----------------|-------------------------|-----------|------------------------|------------|
| <b>6</b>       | Ru1-I1                  | 2.7971(7) | N3-Ru1-I1              | 87.32(9)   |
|                | Ru1-N3                  | 2.007(3)  | N3-Ru1-N6              | 170.60(11) |
|                | Ru1-N6                  | 2.121(3)  | N3-Ru1-C1              | 78.01(13)  |
|                | Ru1-C1                  | 2.031(3)  | N3-Ru1-C9              | 77.80(12)  |
|                | Ru1-C9                  | 2.119(3)  | N3-Ru1-C29             | 100.47(15) |
|                | Ru1-C29                 | 1.972(4)  | N6-Ru1-I1              | 94.36(9)   |
|                | N1-C1                   | 1.342(4)  | N6-Ru1-C1              | 92.74(12)  |
|                | N2-C1                   | 1.396(4)  | N6-Ru1-C9              | 111.47(12) |
|                | N5-C9                   | 1.348(4)  | N6-Ru1-C29             | 78.27(15)  |
|                | N4-C9                   | 1.392(4)  | N1-C1-N2               | 103.0(3)   |
|                | N8-C29                  | 1.338(5)  | N5-C9-N4               | 103.4(3)   |
|                | N7-C29                  | 1.392(5)  | N8-C29-N7              | 103.2(4)   |
|                | Ru1-C11                 | 2.740(16) | N3-Ru1-C11             | 81.6(6)    |
|                | -                       | -         | N8-Ru1-C11             | 99.6(6)    |



**Table S3. Comparative study for catalytic dehydrogenation of benzyl alcohol to benzoic acid.**

| Entry | Cat- (mol %)                                                                                                             | temp. (°C) | Time (h)  | Base (equiv.)      | Solvent            | TON/ (TOF)                                                      |
|-------|--------------------------------------------------------------------------------------------------------------------------|------------|-----------|--------------------|--------------------|-----------------------------------------------------------------|
| 1.    | This work<br>4 ( <b>0.01</b> )<br>4 ( <b>0.005</b> )                                                                     | 110<br>110 | 24<br>120 | KOH (1)<br>KOH (1) | toluene<br>toluene | 10,000 ( 416 h <sup>-1</sup> )<br>20,000 (167 h <sup>-1</sup> ) |
| 2.    | Milstein et al.<br>( <b>0.2</b> )<br>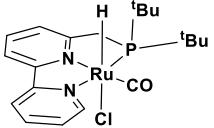   | 110        | 18        | NaOH (1.1)         | water              | 455/ (25h <sup>-1</sup> )                                       |
| 3.    | Peng et al.<br>( <b>0.2</b> )<br>      | 150        | 24        | CsOH (1.0)         | -                  | 400/ (17h <sup>-1</sup> )                                       |
| 4.    | Bera et al.<br>( <b>5.0</b> )<br>     | 110        | 6         | NaOH (18.5)        | water              | 20/ (3h <sup>-1</sup> )                                         |
| 5.    | Szymczak et al.<br>( <b>0.4</b> )<br> | 120        | 18        | KOH (3)            | toluene            | 250/ (14h <sup>-1</sup> )                                       |

|    |                                                                                                                 |     |    |              |                                       |                             |
|----|-----------------------------------------------------------------------------------------------------------------|-----|----|--------------|---------------------------------------|-----------------------------|
| 6. | Chen et al<br><b>(0.5)</b><br>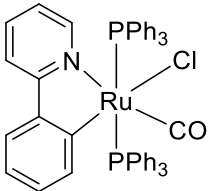 | 110 | 6  | KOH<br>(1.5) | toluene                               | 200/ (33h <sup>-1</sup> )   |
| 7. | Yi et al.<br><b>(0.1)</b><br>  | 120 | 12 | KOH<br>(1.1) | toluene                               | 4000/ (333h <sup>-1</sup> ) |
| 8. | Daw<br><b>(1)</b><br>         | 150 | 24 | KOH<br>(0.5) | Diglyme:<br>H <sub>2</sub> O<br>(9:1) | 400/ (17h <sup>-1</sup> )   |

TON = [(Number of moles of substrate converted)/(Number of moles of catalyst)] at the end of the reaction.

TOF = [(TON)/hour]

# Mechanistic Investigation.

## Generic Display Report

### Analysis Info

Analysis Name C:\Users\IIT01\Downloads\m chem aks-ns-3-14\_GD7\_01\_6472.d  
Method 8. W M.m  
Sample Name m chem aks-ns-3-14  
Comment

Acquisition Date 1/25/2024 2:02:39 PM  
Operator Ghanashyam  
Instrument micrOTOF-Q

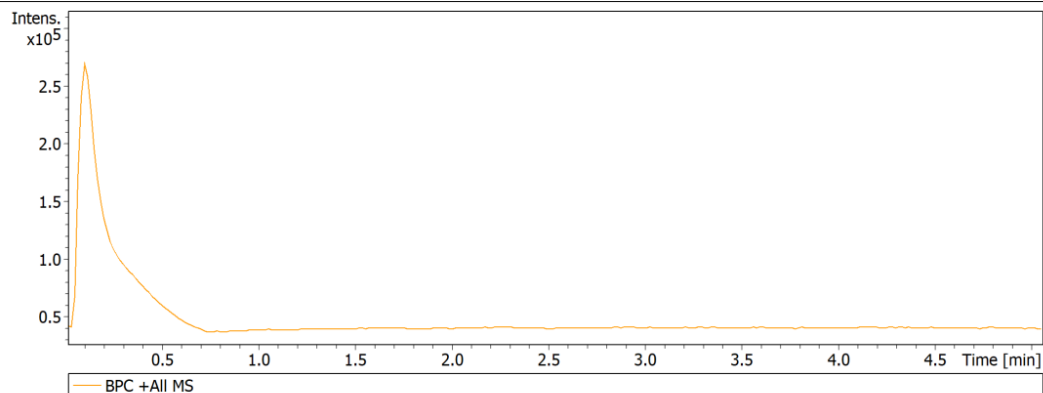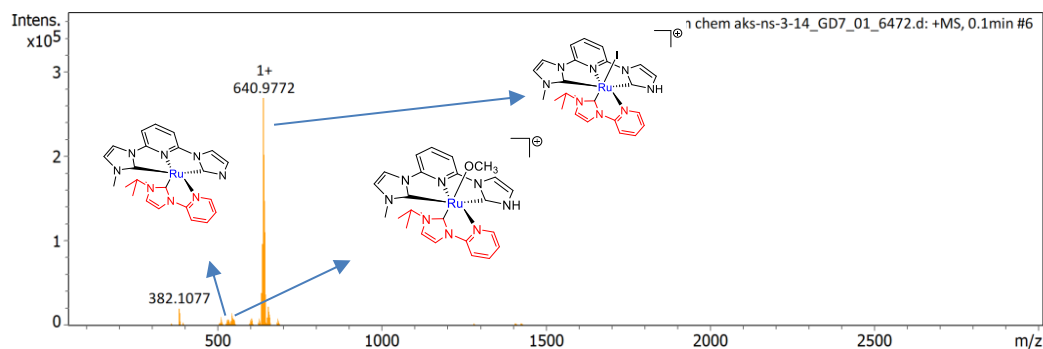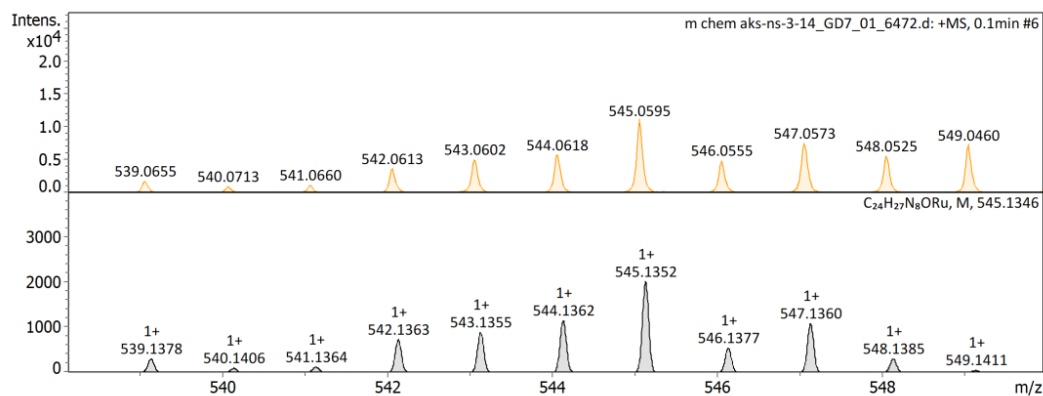

Figure S28. LCMS of catalyst 4 with KOH (2 equiv.) after 1 h.

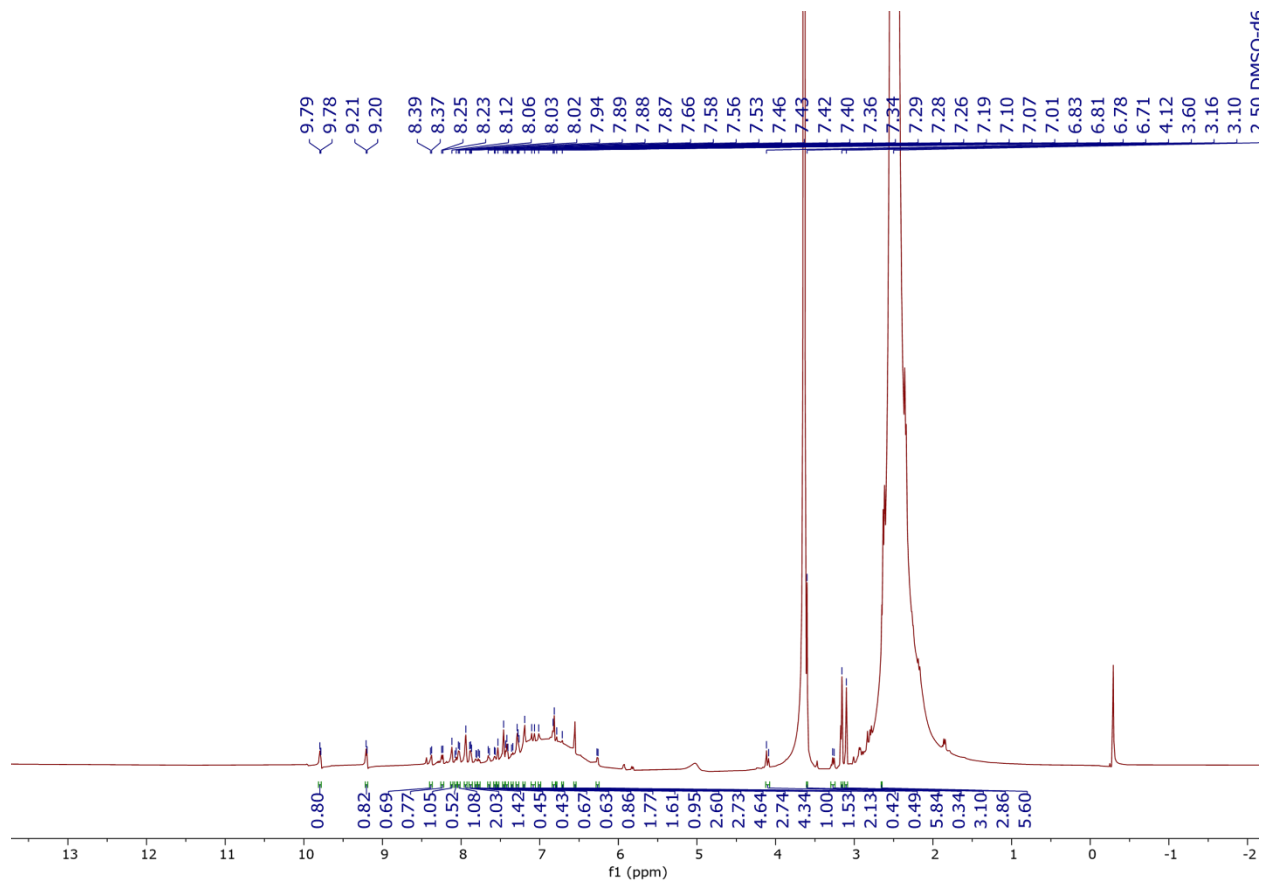

Figure S29. Deprotonation of complex 4 with KOH in NMR tube

## Generic Display Report

### Analysis Info

Analysis Name C:\Users\IIT01\Downloads\m chem aks-ns-3-13\_BA6\_01\_5372.d  
Method 8. W M.m  
Sample Name m chem aks-ns-3-13  
Comment

Acquisition Date 12/21/2023 1:44:53 PM  
Operator Ghanashyam  
Instrument micrOTOF-Q

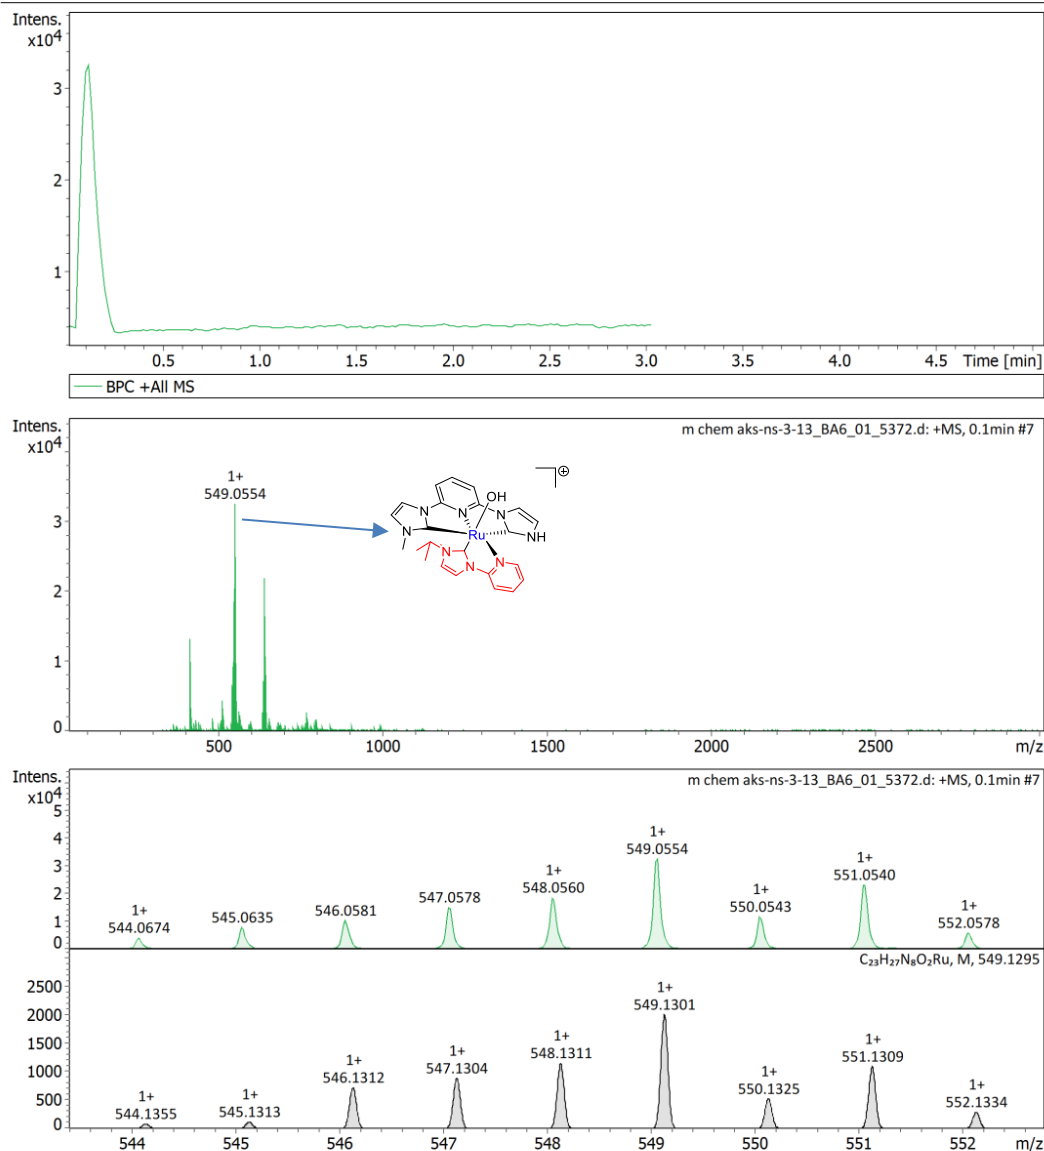

**Figure S30.** LCMS of catalyst 4 with KOH (2 equiv.) in toluene after 2 h.

# Generic Display Report

**Analysis Info**  
Analysis Name: C:\Users\IIT01\Downloads\m chem aks-ns-2-263-1\_RC1\_01\_9072.d  
Method: 8. W M.m  
Sample Name: m chem aks-ns-2-263-1  
Comment:  
Acquisition Date: 4/29/2024 2:59:01 PM  
Operator: Ghanashyam Bhavsar  
Instrument: micrOTOF-Q

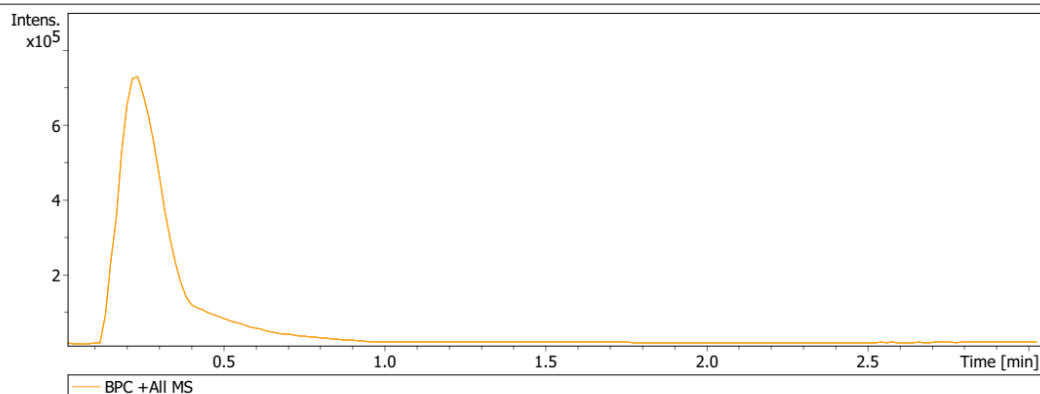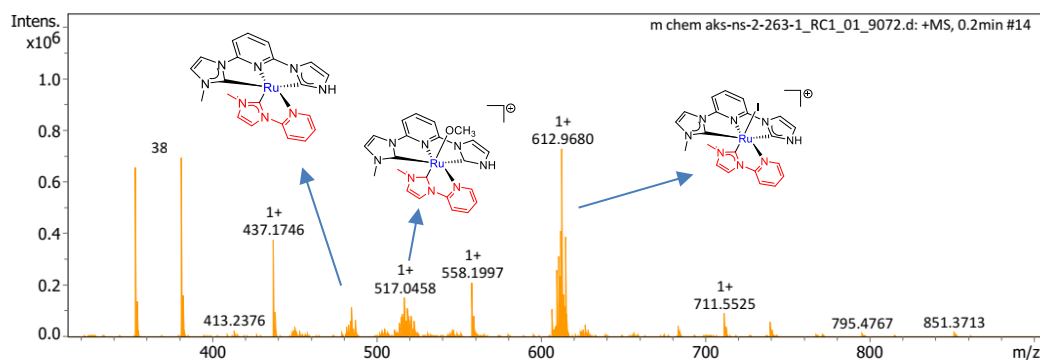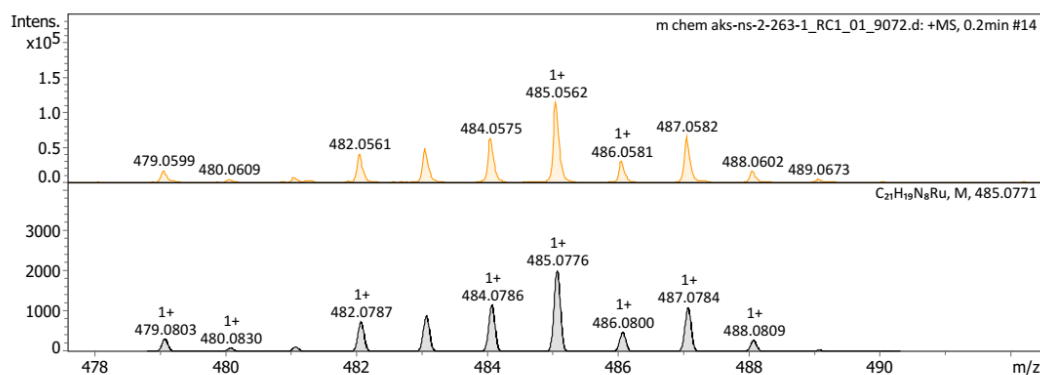

**Figure S31 . LCMS of reaction mixture of cat 3 and KOH in toluene (2 equiv.)**

## Generic Display Report

### Analysis Info

Analysis Name C:\Users\IIT01\Downloads\m chem aks-ns-2-366-2\_RA3\_01\_9512.d  
Method 8. W M.m  
Sample Name m chem aks-ns-2-366-2  
Comment

Acquisition Date 5/17/2024 10:28:45 AM  
Operator Ghanashyam Bhavsar  
Instrument micrOTOF-Q

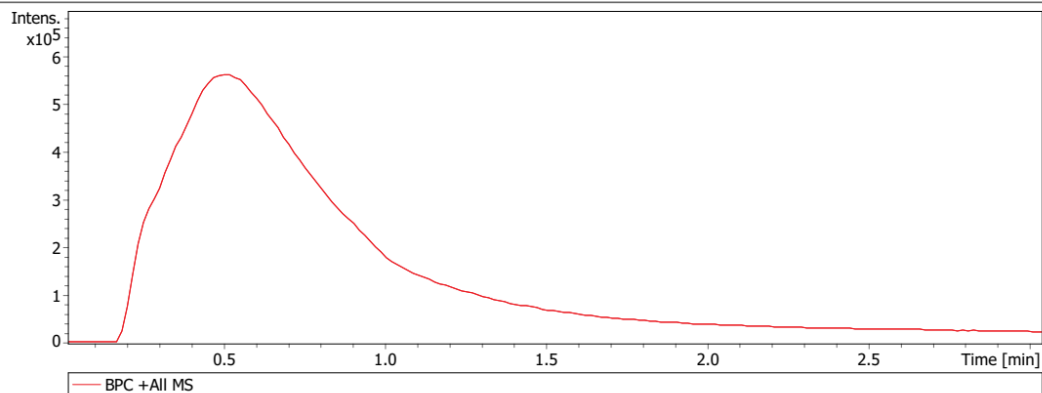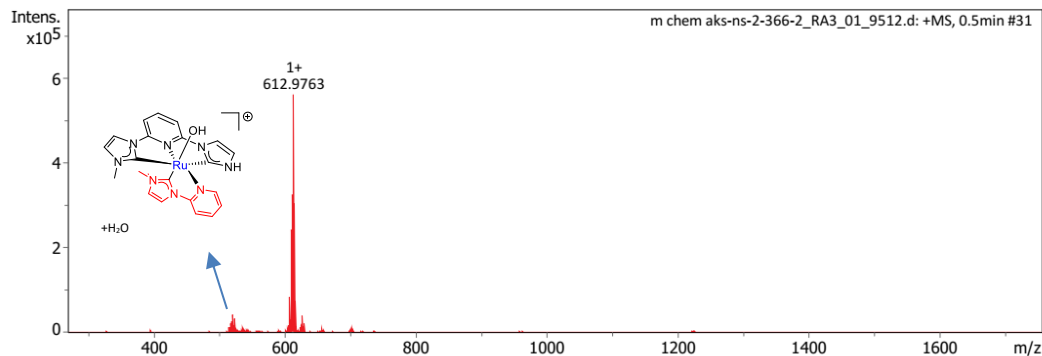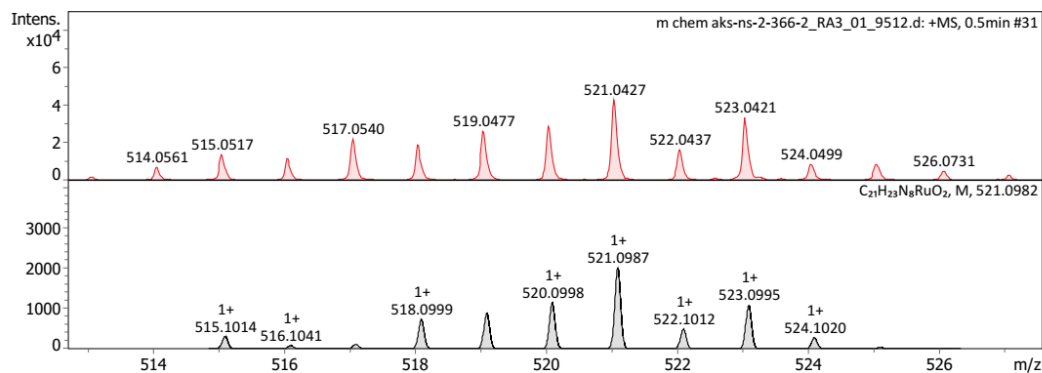

**Figure S32** . LCMS of reaction mixture of cat 3 and KOH in toluene (1 equiv.)

# Generic Display Report

## Analysis Info

Analysis Name C:\Users\IIT01\Downloads\m chem AKS-NS-2-367-2A\_RA8\_01\_10474.d  
Method 8. W M.m  
Sample Name m chem AKS-NS-2-367-2A  
Comment

Acquisition Date 6/14/2024 2:23:46 PM  
Operator Ghanashyam Bhavsar  
Instrument micrOTOF-Q

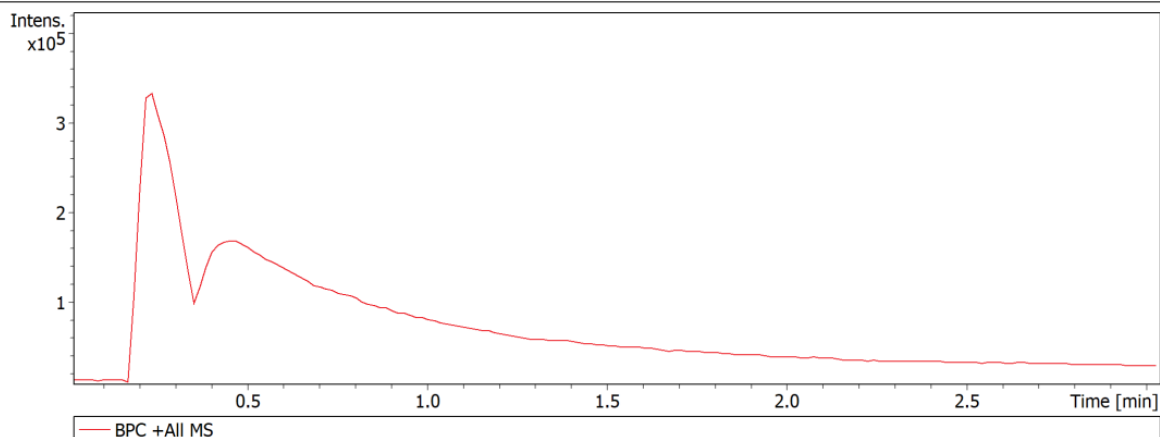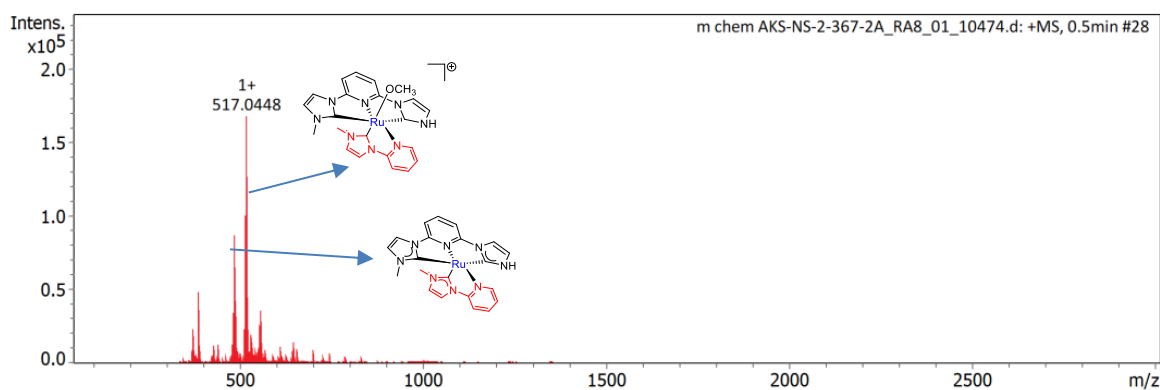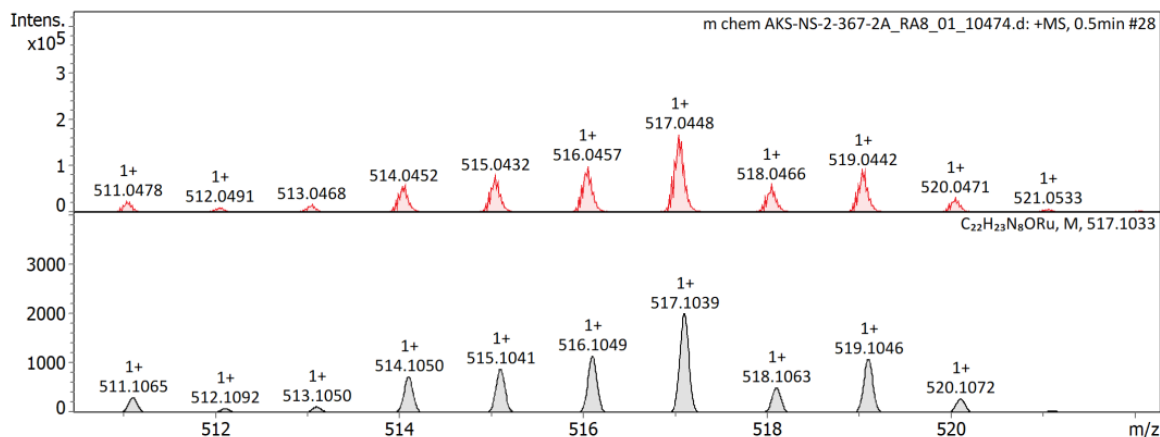

**Figure S33** . LCMS of reaction mixture of cat 3 and KOH in water.



# Generic Display Report

## Analysis Info

Analysis Name C:\Users\IIT01\Downloads\m chem aks-ns-2-366-4\_RA4\_01\_9513.d  
Method 8. W M.m  
Sample Name m chem aks-ns-2-366-4  
Comment

Acquisition Date 5/17/2024 10:32:39 AM

Operator Ghanashyam Bhavsar  
Instrument micrOTOF-Q

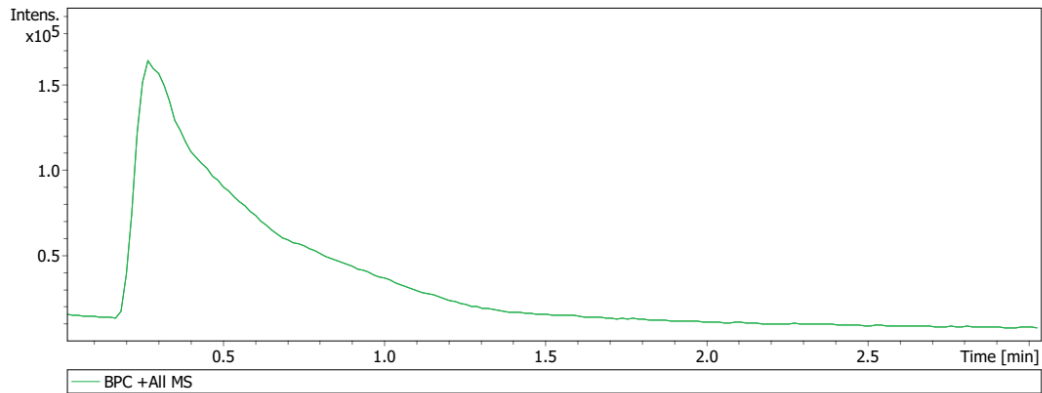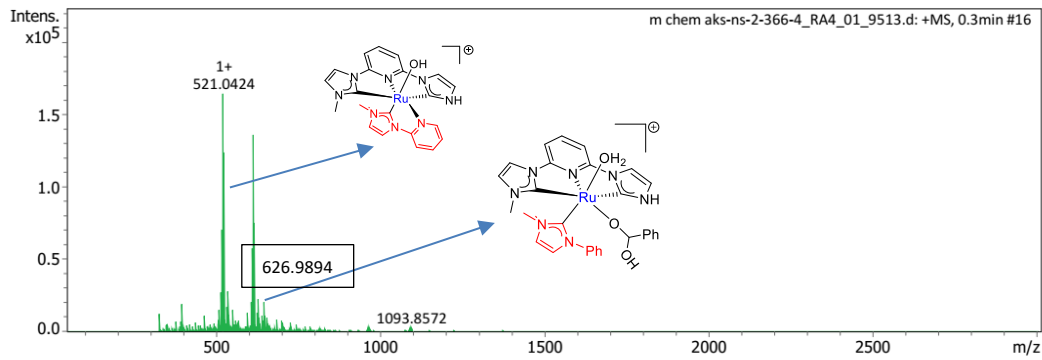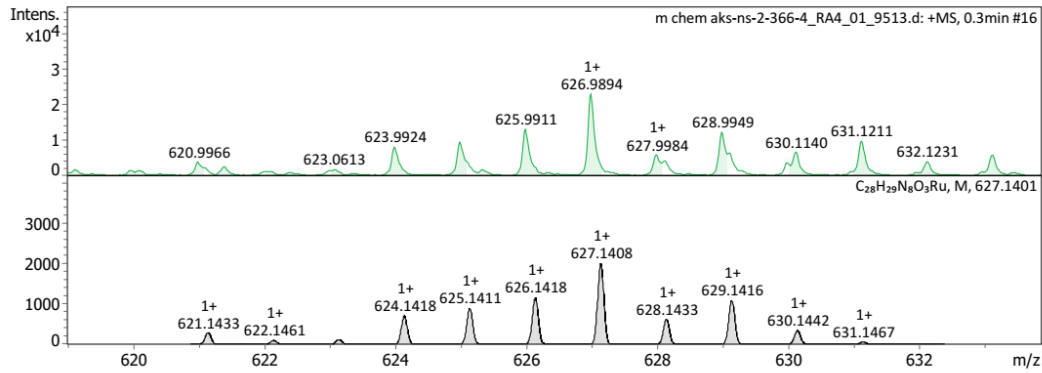

**Figure S34** . LCMS of reaction mixture of after addition of benzyl alcohol substrate.

## Dehydrogenation of benzaldehyde to benzoic acid

Catalyst **4** (0.1 mol%), KOH (1 mmol) were mixed in dry toluene 3 ml in a schlenk tube and then stirred for 1 hour. After that the oil bath temperature was heated to 120 °C and benzaldehyde (1 mmol) was added to reaction mixture and schlenk tube was dipped in preheated oil bath under inert atmosphere. The reaction was stirred for 1 hour and cooled. The workup was followed as mentioned in procedure. The product was analysed by  $^1\text{H-NMR}$  showing formation of benzoic acid with traces of benzyl alcohol.

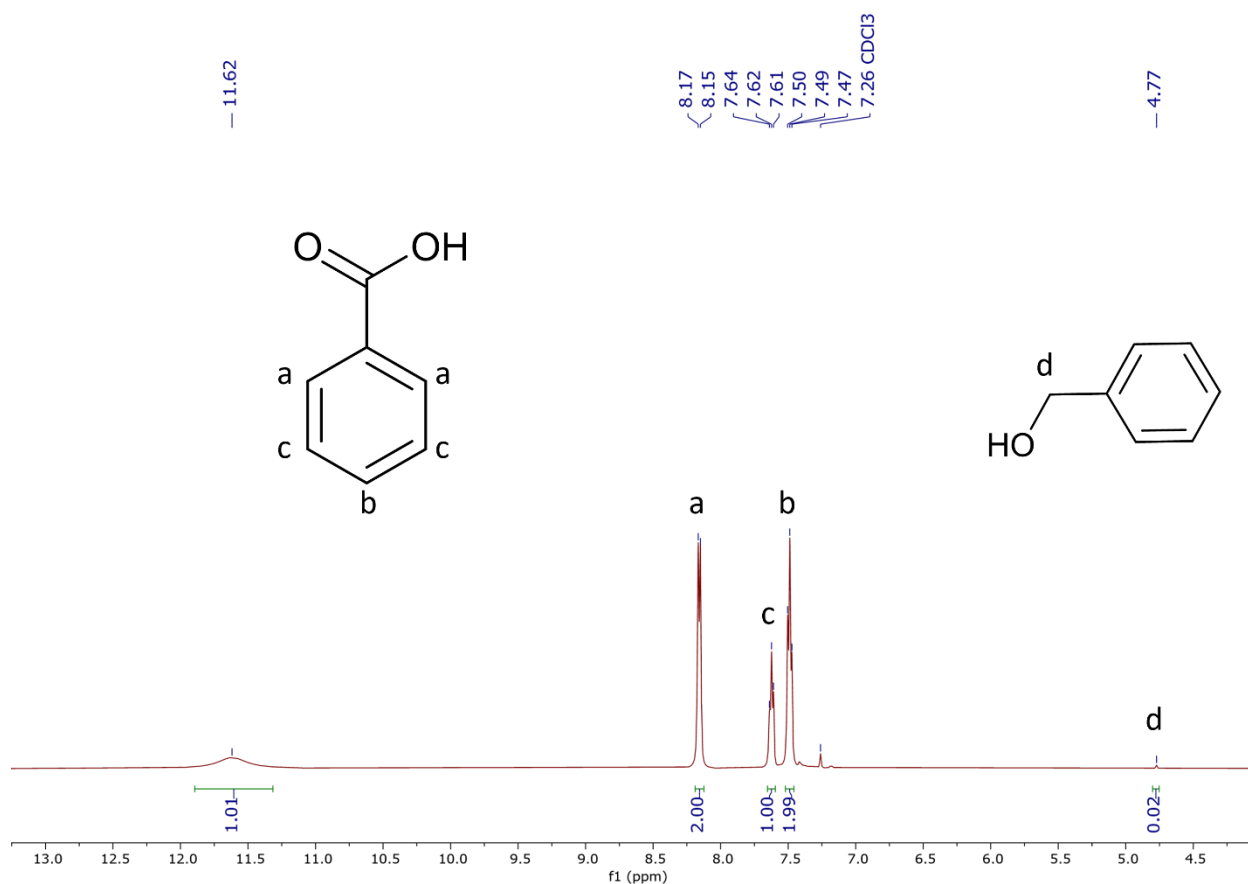

**Figure S35.** NMR spectra for dehydrogenation of benzaldehyde

*NMR of carboxylic acid products after dehydrogenation of alcohol*

**(4a) Benzoic acid:**

$^1\text{H}$  NMR (500 MHz,  $\text{CDCl}_3$ )  $\delta$  11.67 (s, 1H), 8.14 (dd,  $J = 1.5, 8.4$  Hz, 2H), 7.63 (t,  $J = 7.4$  Hz, 1H), 7.49 (t,  $J = 7.8$  Hz, 2H).  $^{13}\text{C}\{^1\text{H}\}$  NMR (126 MHz,  $\text{CDCl}_3$ )  $\delta$  172.18 (COOH), 133.72, 130.12, 129.20, 128.39.

**(4b) p-Methoxy benzoic acid:**

$^1\text{H}$  NMR (500 MHz,  $\text{CDCl}_3$ )  $\delta$  6.39 (dd,  $J = 5.5, 8.9$  Hz, 2H), 6.13 (t,  $J = 8.9$  Hz, 2H), 2.94 (s, 3H).  $^{13}\text{C}\{^1\text{H}\}$  NMR (126 MHz,  $\text{CDCl}_3$ )  $\delta$  167.18 (COOH), 163.01, 131.52, 123.14, 113.99, 55.62.

**(4c) m-Methoxy benzoic acid**

$^1\text{H}$  NMR (500 MHz,  $\text{CDCl}_3$ )  $\delta$  7.72 (d,  $J = 7.6$  Hz, 1H), 7.63 (s, 1H), 7.39 (t,  $J = 8.0$  Hz, 1H), 7.17 (ddd,  $J = 1.0, 2.7, 8.3$  Hz, 1H), 3.87 (s, 3H).  $^{13}\text{C}\{^1\text{H}\}$  NMR (126 MHz,  $\text{CDCl}_3$ )  $\delta$  171.69 (COOH), 159.77, 130.65, 129.69, 122.83, 120.63, 114.54, 55.62.

**(4d) o-Methoxy benzoic acid**

$^1\text{H}$  NMR (500 MHz,  $\text{CDCl}_3$ )  $\delta$  8.06 (dd,  $J = 1.5, 8.3$  Hz, 1H), 7.45 (td,  $J = 1.5, 7.5$  Hz, 1H), 7.27 (m, 2H), 2.58 (s, 3H).  $^{13}\text{C}\{^1\text{H}\}$  NMR (126 MHz,  $\text{CDCl}_3$ )  $\delta$  172.55 (COOH), 141.50, 133.09, 132.08, 131.71, 128.34, 126.00, 29.85.

**(4e) m,p-dimethoxybenzoic acid**

$^1\text{H}$  NMR (500 MHz,  $\text{CDCl}_3$ )  $\delta$  7.78 (dd,  $J = 2.0, 8.4$  Hz, 1H), 7.60 (d,  $J = 2.1$  Hz, 1H), 6.92 (d,  $J = 8.5$  Hz, 1H), 3.95 (d,  $J = 5.2$  Hz, 6H).  $^{13}\text{C}\{^1\text{H}\}$  NMR (126 MHz,  $\text{CDCl}_3$ )  $\delta$  171.71 (COOH), 153.86, 148.83, 124.73, 121.81, 112.45, 110.46, 56.16.

**(4f) p-(benzyloxy)benzoic acid**

$^1\text{H}$  NMR (500 MHz, DMSO)  $\delta$  12.62 (s, 1H), 7.92 – 7.86 (m, 2H), 7.46 (d,  $J = 7.1$  Hz, 2H), 7.37 (dt,  $J = 7.4, 29.5$  Hz, 3H), 7.09 (d,  $J = 8.1$  Hz, 2H), 5.18 (d,  $J = 3.2$  Hz, 2H).  $^{13}\text{C}\{^1\text{H}\}$  NMR (126 MHz, DMSO)  $\delta$  166.97 (COOH), 161.93, 136.54, 131.34, 128.50, 127.82, 114.62, 69.45.

**(4g) p-Methyl benzoic acid:**

$^1\text{H}$  NMR (500 MHz, DMSO)  $\delta$  7.83 (d,  $J$  = 8.1 Hz, 2H), 7.30 (d,  $J$  = 8.2 Hz, 2H), 2.37 (s, 3H).  
 $^{13}\text{C}\{^1\text{H}\}$  NMR (126 MHz, DMSO)  $\delta$  167.16 (COOH), 142.82, 129.16, 127.94, 20.96.

**(4h) m-Methyl benzoic acid:**

$^1\text{H}$  NMR (500 MHz, DMSO)  $\delta$  12.83 (s, 1H), 7.78 – 7.71 (m, 2H), 7.41 (dd,  $J$  = 7.7, 22.6 Hz, 2H), 2.36 (s, 3H).  $^{13}\text{C}\{^1\text{H}\}$  NMR (126 MHz, DMSO)  $\delta$  167.43, 137.91, 133.48, 130.73, 129.74, 128.47, 126.47, 20.83.

**(4i) p-<sup>iso</sup>Propyl benzoic acid:**

$^1\text{H}$  NMR (500 MHz,  $\text{CDCl}_3$ )  $\delta$  8.04 (d,  $J$  = 6.3 Hz, 2H), 7.33 (d,  $J$  = 8.4 Hz, 2H), 3.04 – 2.93 (m, 1H) 1.27 (d,  $J$  = 17.1 Hz, 6H).  $^{13}\text{C}\{^1\text{H}\}$  NMR (126 MHz,  $\text{CDCl}_3$ )  $\delta$  171.83, 155.40, 130.53, 127.16, 126.75, 34.49, 23.83.

**(4j) p-<sup>tert</sup>Butyl benzoic acid**

$^1\text{H}$  NMR (500 MHz,  $\text{CDCl}_3$ )  $\delta$  8.05 (d,  $J$  = 8.7 Hz, 2H), 7.49 (d,  $J$  = 8.7 Hz, 2H), 1.36 (s, 9H).  
 $^{13}\text{C}\{^1\text{H}\}$  NMR (126 MHz,  $\text{CDCl}_3$ )  $\delta$  171.95, 157.73, 130.27, 126.65, 125.64, 35.35, 31.25.

**(4k) p-Amino benzoic acid**

$^1\text{H}$  NMR (500 MHz,  $\text{CDCl}_3$ )  $\delta$  7.91 (d,  $J$  = 8.7 Hz, 2H), 6.66 (d,  $J$  = 8.7 Hz, 2H).  $^{13}\text{C}\{^1\text{H}\}$  NMR (126 MHz,  $\text{CDCl}_3$ )  $\delta$  171.10 (COOH), 151.62, 132.53, 118.77, 113.93.

**(4l) m-aminobenzoic acid**

$^1\text{H}$  NMR (500 MHz, DMSO)  $\delta$  12.55 (s, 1H) 7.16 (s, 1H), 7.13 – 7.04 (m, 2H), 6.79 – 6.73 (m, 1H).  $^{13}\text{C}\{^1\text{H}\}$  NMR (126 MHz, DMSO)  $\delta$  167.90 (COOH), 148.85, 131.33, 128.89, 117.99, 116.64, 114.44.

**(4m) o-aminobenzoic acid**

No reaction

**(4n) m- Nitro benzoic acid:**

$^1\text{H}$  NMR (500 MHz, DMSO- $d_6$ ):  $\delta$  8.29 (d,  $J$  = 8.4 Hz, 1H), 8.16 (t,  $J$  = 8.5 Hz, 1H), 7.9 (d,  $J$  = 8.5 Hz, 1H), 7.3 (s,  $J$  = 8.5 Hz, 1H).  $^{13}\text{C}\{^1\text{H}\}$  NMR (126 MHz, DMSO)  $\delta$  192.83, 130.93, 130.73, 127.09, 123.74, 123.53, 123.35.

**(4o) p-Fluoro benzoic acid:**

$^1\text{H}$  NMR (500 MHz, DMSO)  $\delta$  8.00 (dd,  $J$  = 5.6, 8.9 Hz, 2H), 7.32 (t,  $J$  = 8.9 Hz, 2H).  $^{13}\text{C}\{^1\text{H}\}$  NMR (126 MHz, DMSO)  $\delta$  166.82, 131.87, 131.47, 130.30, 127.01.

**(4p) p-Chloro benzoic acid:**

$^1\text{H}$  NMR (500 MHz,  $\text{CDCl}_3$ )  $\delta$  8.03 (d,  $J$  = 4.4 Hz, 2H), 7.45 (d,  $J$  = 9.0 Hz, 2H).  $^{13}\text{C}\{^1\text{H}\}$  NMR (126 MHz, DMSO)  $\delta$  166.82, 131.87, 131.47, 130.30, 127.01.

**(4q) p-Bromo benzoic acid:**

$^1\text{H}$  NMR (500 MHz, DMSO)  $\delta$  7.86 (d,  $J$  = 8.5 Hz, 2H), 7.70 (d,  $J$  = 6.4 Hz, 2H).  $^{13}\text{C}\{^1\text{H}\}$  NMR (126 MHz, DMSO)  $\delta$  166.82, 131.87, 131.47, 130.30, 127.01.

**(4r) p-Iodo benzoic acid:**

$^1\text{H}$  NMR (500 MHz,  $\text{CDCl}_3$ )  $\delta$  8.03 (d,  $J$  = 4.4 Hz, 2H), 7.45 (d,  $J$  = 9.0 Hz, 2H).  $^{13}\text{C}\{^1\text{H}\}$  NMR (126 MHz, DMSO)  $\delta$  166.82, 131.87, 131.47, 130.30, 127.01.

**(4s) m-Floro benzoic acid:**

$^1\text{H}$  NMR (500 MHz,  $\text{CDCl}_3$ )  $\delta$  7.91 (d,  $J$  = 9.2 Hz, 1H), 7.46 (td,  $J$  = 5.5, 8.0 Hz, 2H), 7.32 (td,  $J$  = 2.7, 8.2 Hz, 1H).  $^{13}\text{C}\{^1\text{H}\}$  NMR (126 MHz,  $\text{CDCl}_3$ )  $\delta$  170.50, 163.69, 161.73, 131.55 (d,  $J$  = 7.4 Hz), 130.35 (d,  $J$  = 3.7 Hz), 126.10 (d,  $J$  = 3.7 Hz), 121.08 (d,  $J$  = 21.1 Hz), 117.20 (d,  $J$  = 23.0 Hz).

**(4t) m-Chloro benzoic acid:**

$^1\text{H}$  NMR (500 MHz, DMSO)  $\delta$  13.26 (s, 1H), 7.92 (s, 1H), 7.70 (d,  $J$  = 8.0 Hz, 1H), 7.55 (d,  $J$  = 8.2 Hz, 1H).  $^{13}\text{C}\{^1\text{H}\}$  NMR (126 MHz, DMSO)  $\delta$  166.10 (COOH), 133.35, 132.95, 132.73, 130.68, 128.84.

**(4u) o-Bromo benzoic acid:**

$^1\text{H}$  NMR (500 MHz, DMSO)  $\delta$  7.72 (ddd,  $J = 1.8, 7.6, 11.4$  Hz, 2H), 7.51 – 7.39 (m, 2H).  
 $^{13}\text{C}\{^1\text{H}\}$  NMR (126 MHz, DMSO)  $\delta$  167.42 (COOH), 133.77, 132.52, 127.74, 119.94.

**(4v) Furan-2-Carboxylic acid:**

$^1\text{H}$  NMR (500 MHz, DMSO)  $\delta$  8.74 (s, 1H), 7.63 (dd,  $J = 0.9, 1.8$  Hz, 1H), 7.34 – 7.28 (m, 1H), 6.55 (dd,  $J = 1.8, 3.5$  Hz, 1H).  $^{13}\text{C}\{^1\text{H}\}$  NMR (126 MHz,  $\text{CDCl}_3$ )  $\delta$  163.62, 147.68, 144.36, 120.29, 112.62.

**(4w) Piperonylic acid:**

$^1\text{H}$  NMR (500 MHz, DMSO)  $\delta$  12.74 (s, 1H), 7.54 (dd,  $J = 1.8, 8.2$  Hz, 1H), 7.36 (d,  $J = 1.8$  Hz, 1H), 7.00 (d,  $J = 8.2$  Hz, 1H), 6.12 (s, 2H).  $^{13}\text{C}\{^1\text{H}\}$  NMR (126 MHz, DMSO)  $\delta$  166.64, 151.15, 147.49, 124.98, 124.67, 108.80, 108.09, 101.95.

**(4x) Butyric acid:**

$^1\text{H}$   $^1\text{H}$  NMR (500 MHz,  $\text{CDCl}_3$ )  $\delta$  2.33 (t,  $J = 7.4$  Hz, 2H), 1.66 (q,  $J = 7.5$  Hz, 2H), 0.96 (d,  $J = 7.5$  Hz, 3H).  $^{13}\text{C}\{^1\text{H}\}$  NMR (126 MHz,  $\text{CDCl}_3$ )  $\delta$  179.52, 35.77, 18.04, 13.48.

**(4y) Hexan-1-ol:**

No reaction

**(4z) Phenylethan-1-ol:**

No reaction

## NMR Spectra of carboxylic acid products-

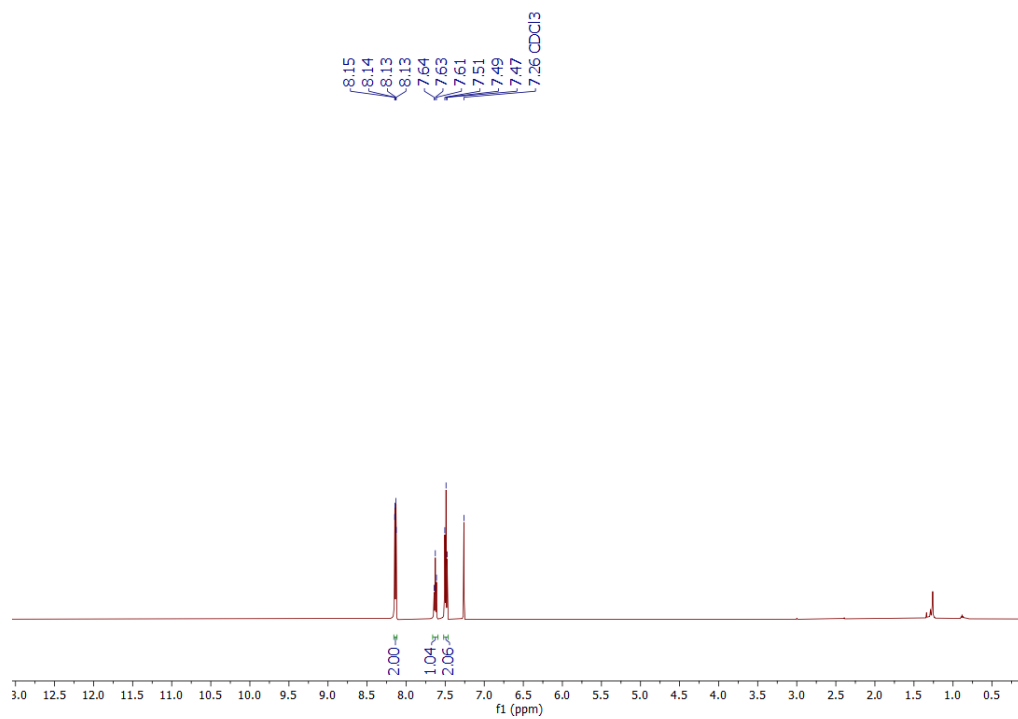

Figure S36.  $^1\text{H}$  NMR of benzoic acid

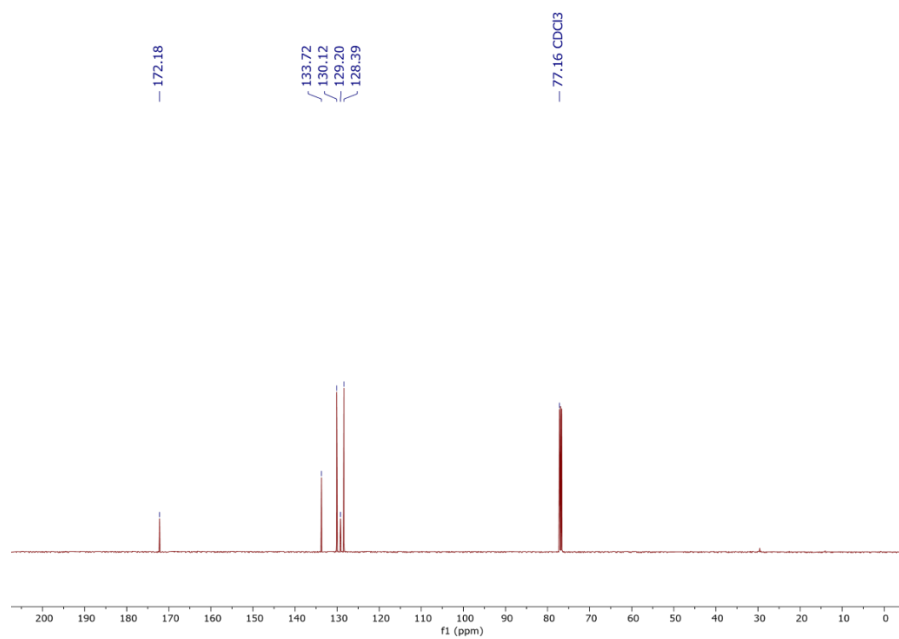

Figure S37.  $^{13}\text{C}\{^1\text{H}\}$  NMR of benzoic acid

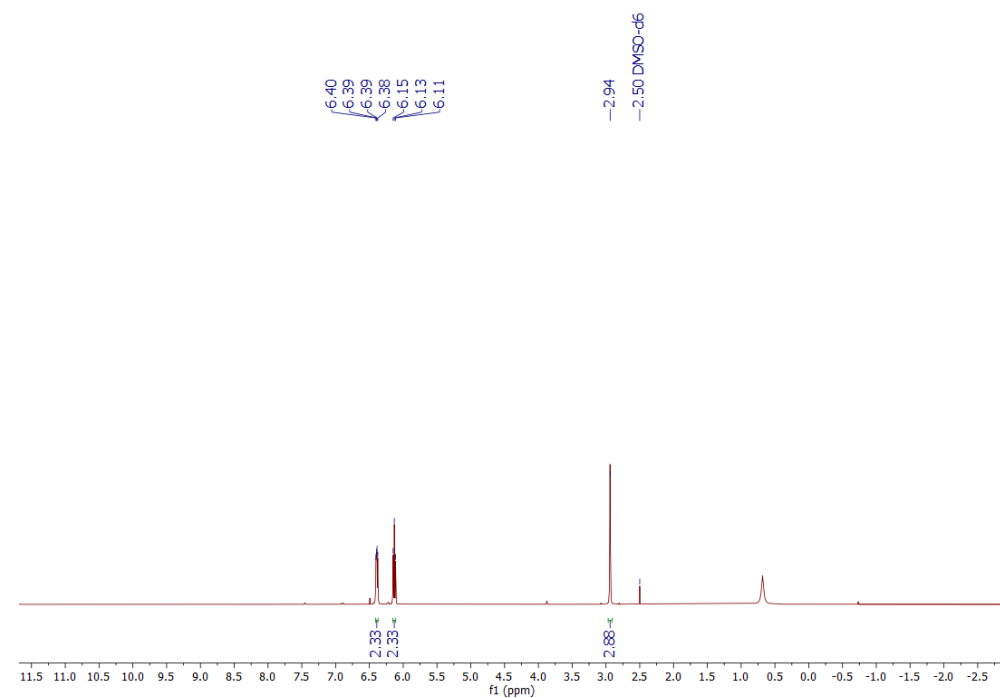

Figure S38.  $^1\text{H}$  NMR of p-methoxy benzoic acid

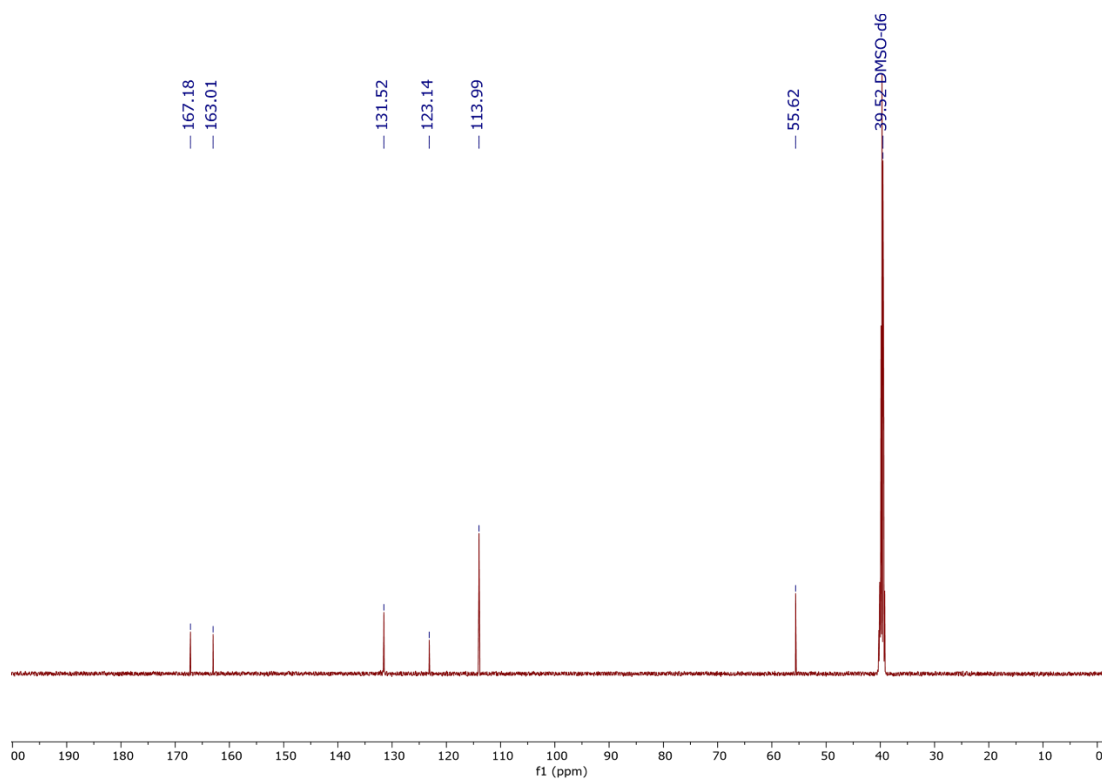

Figure S39.  $^{13}\text{C}\{^1\text{H}\}$  NMR of p-methoxy benzoic acid



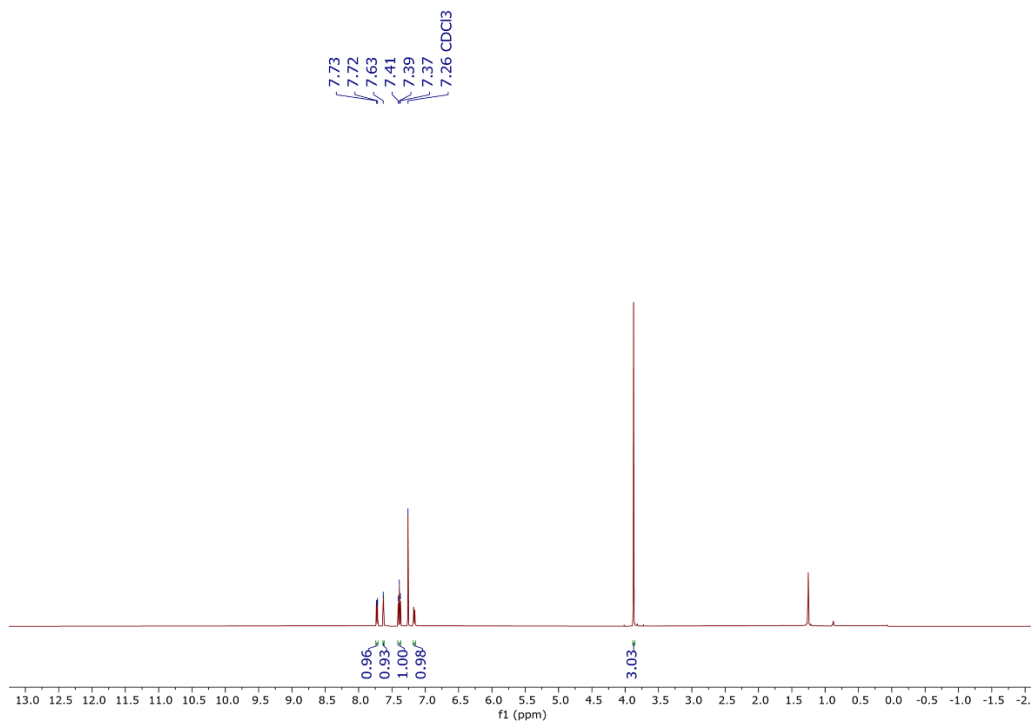

Figure S40.  $^1\text{H}$ NMR of m-methoxy benzoic acid

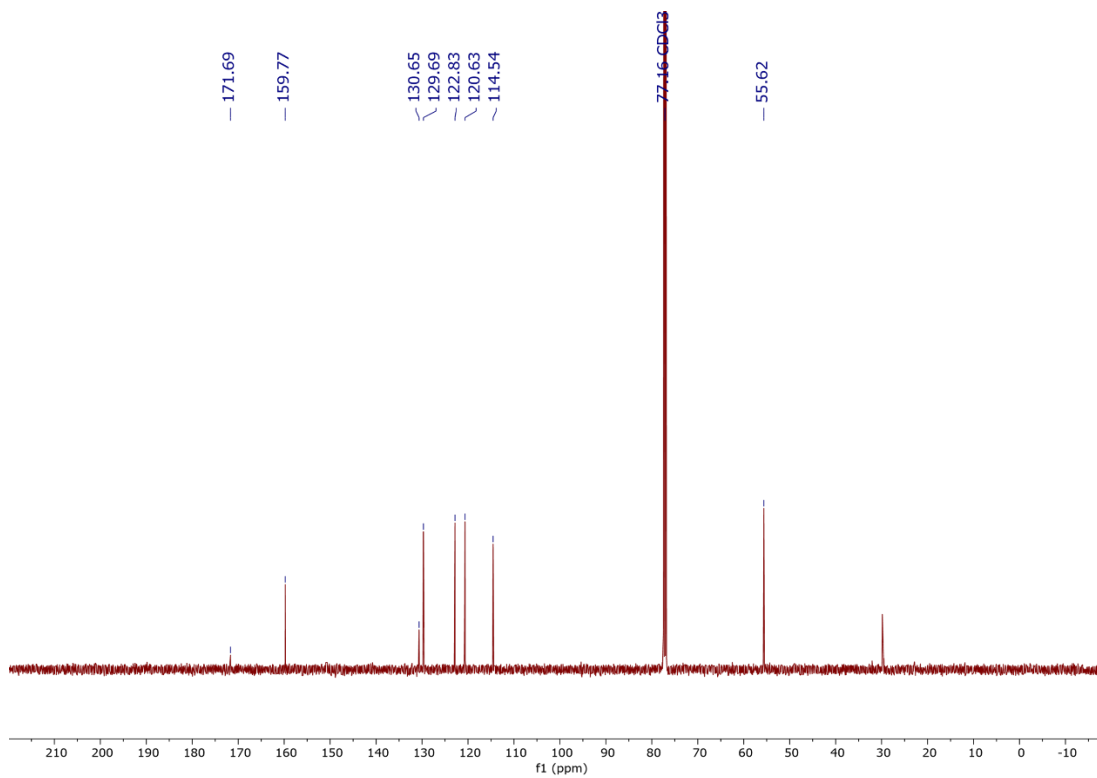

Figure S41.  $^{13}\text{C}\{^1\text{H}\}$ NMR of m-methoxy benzoic acid

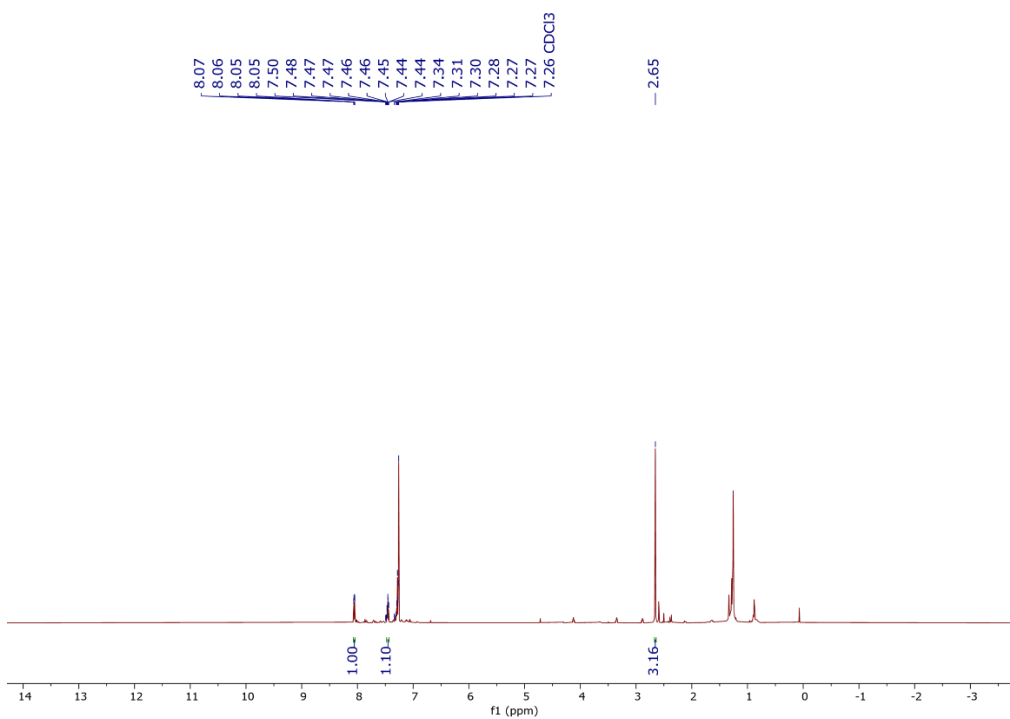

Figure S42.  $^1\text{H}$  NMR of o-methoxy benzoic acid

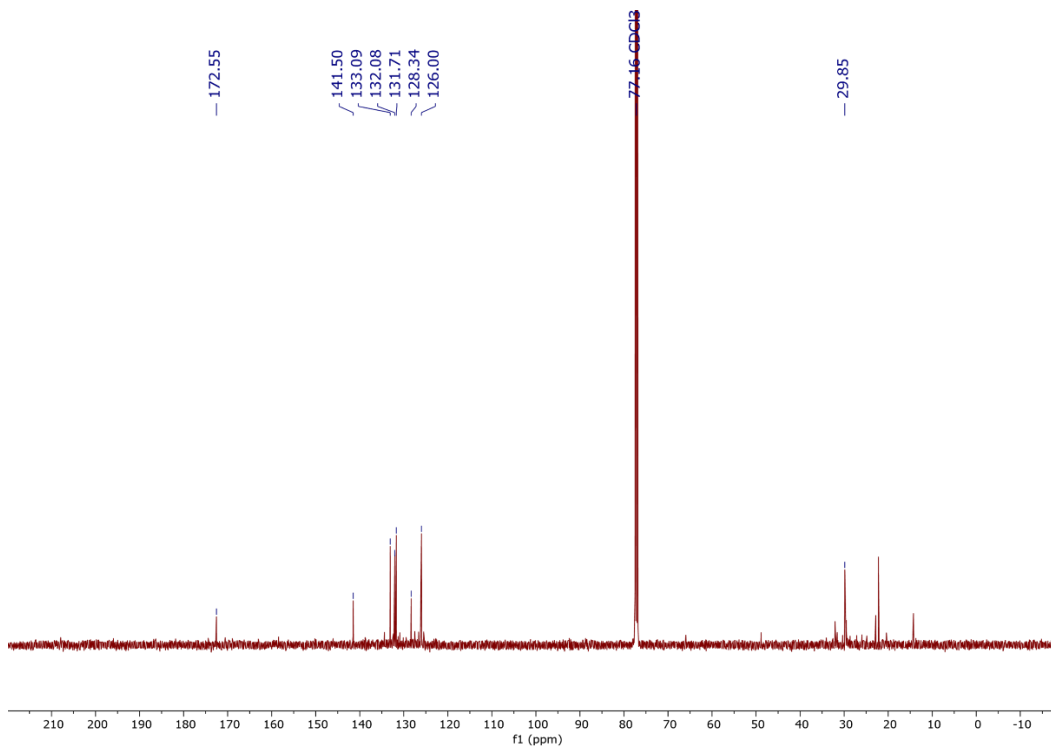

Figure S43.  $^{13}\text{C}\{^1\text{H}\}$  NMR of o-methoxy benzoic acid

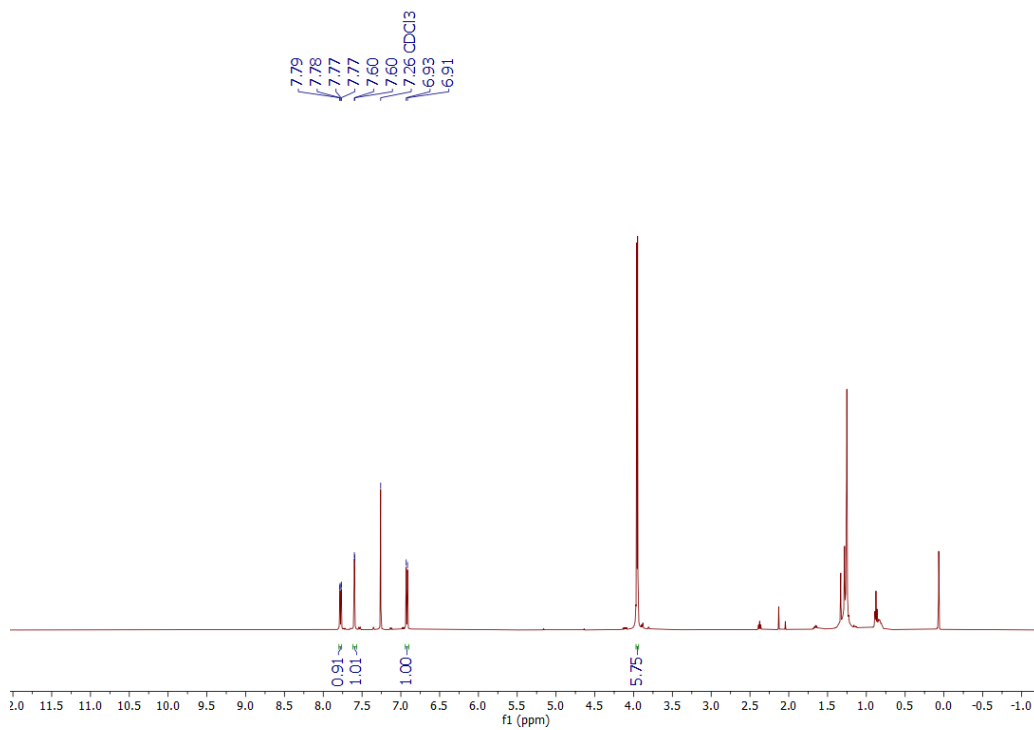

Figure S44.  $^1\text{H}$  NMR of m,p-dimethoxy benzoic acid

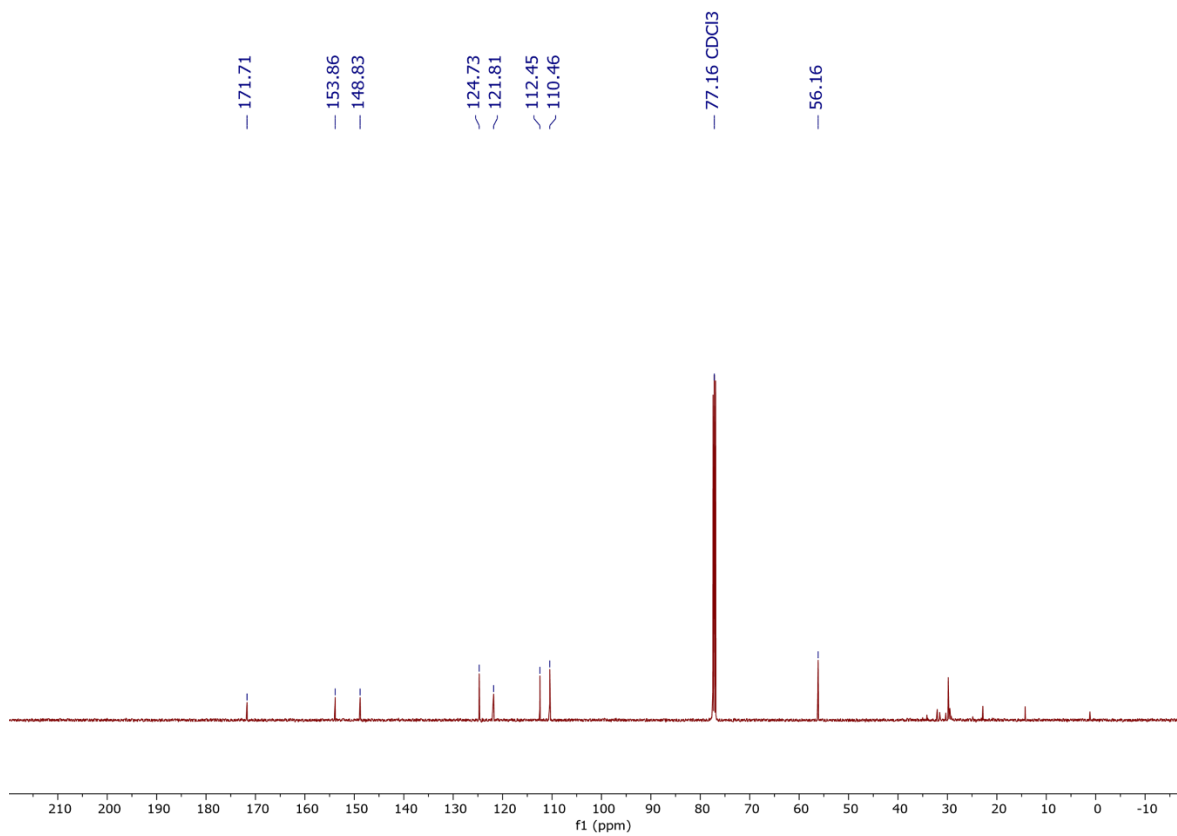

Figure S45.  $^{13}\text{C}\{^1\text{H}\}$  NMR of m,p-dimethoxy benzoic acid

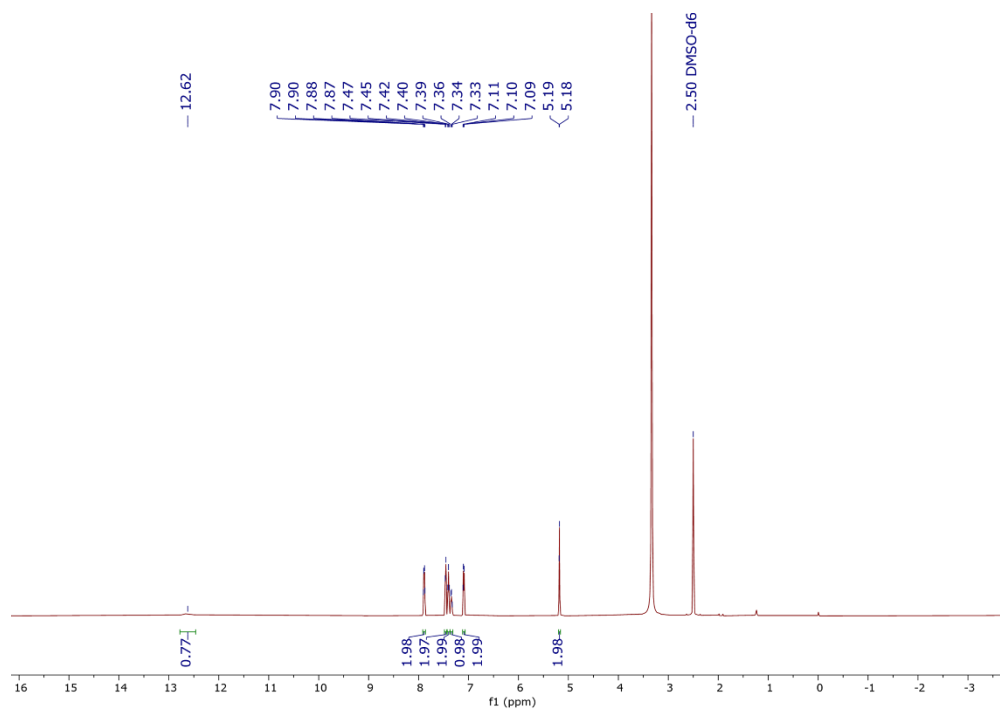

Figure S46.  $^1\text{H}$  NMR of p-(benzyloxy)benzoic acid

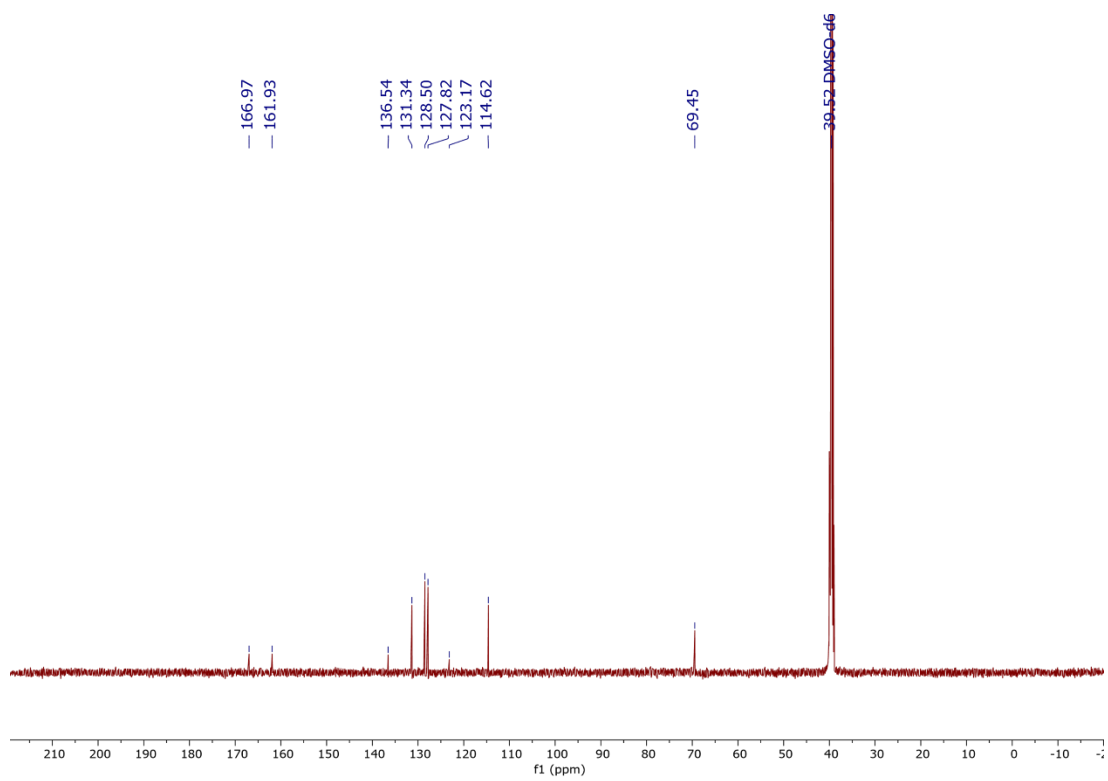

Figure S47.  $^{13}\text{C}\{^1\text{H}\}$  NMR of p-(benzyloxy)benzoic acid

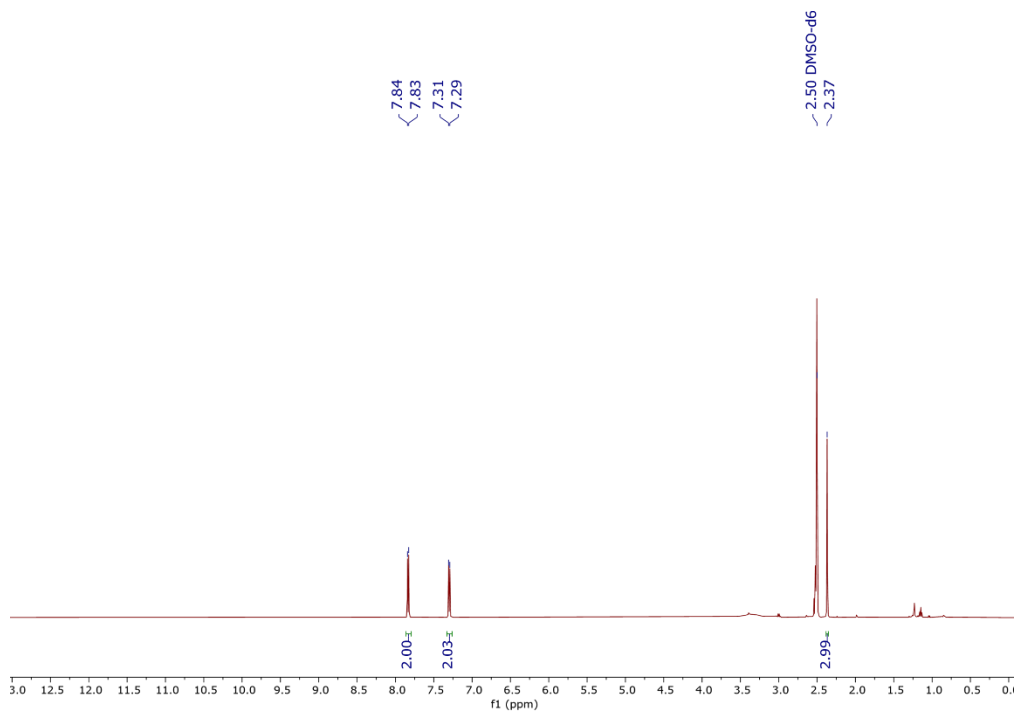

Figure S48.  $^1\text{H}$  NMR of p-methyl benzoic acid

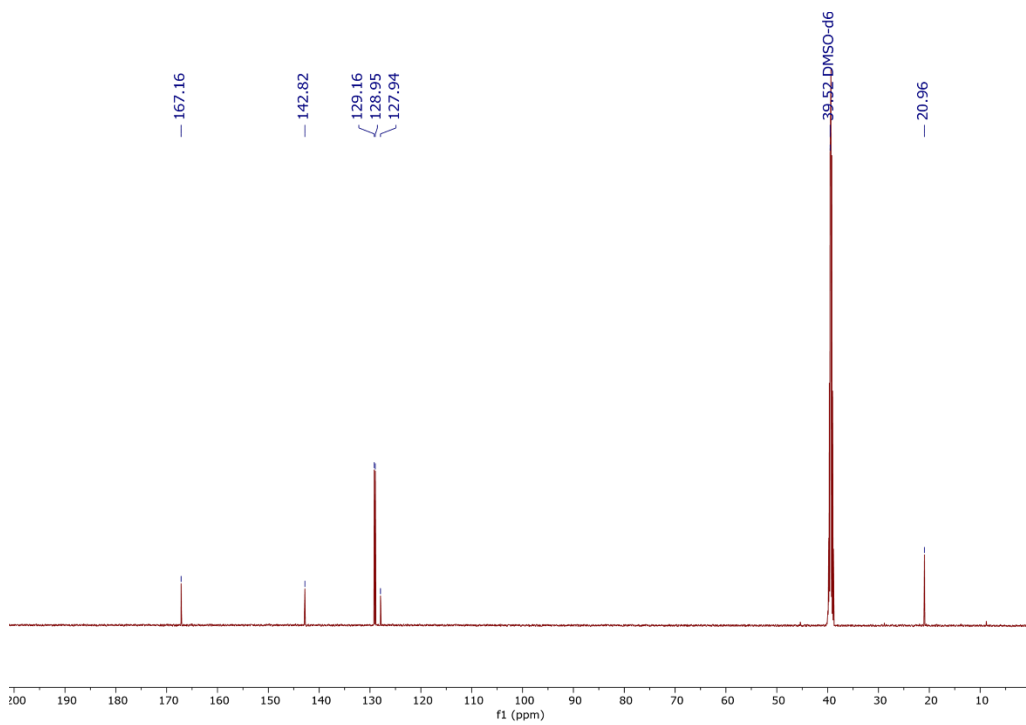

Figure S49.  $^{13}\text{C}\{^1\text{H}\}$  NMR of p-methyl benzoic acid

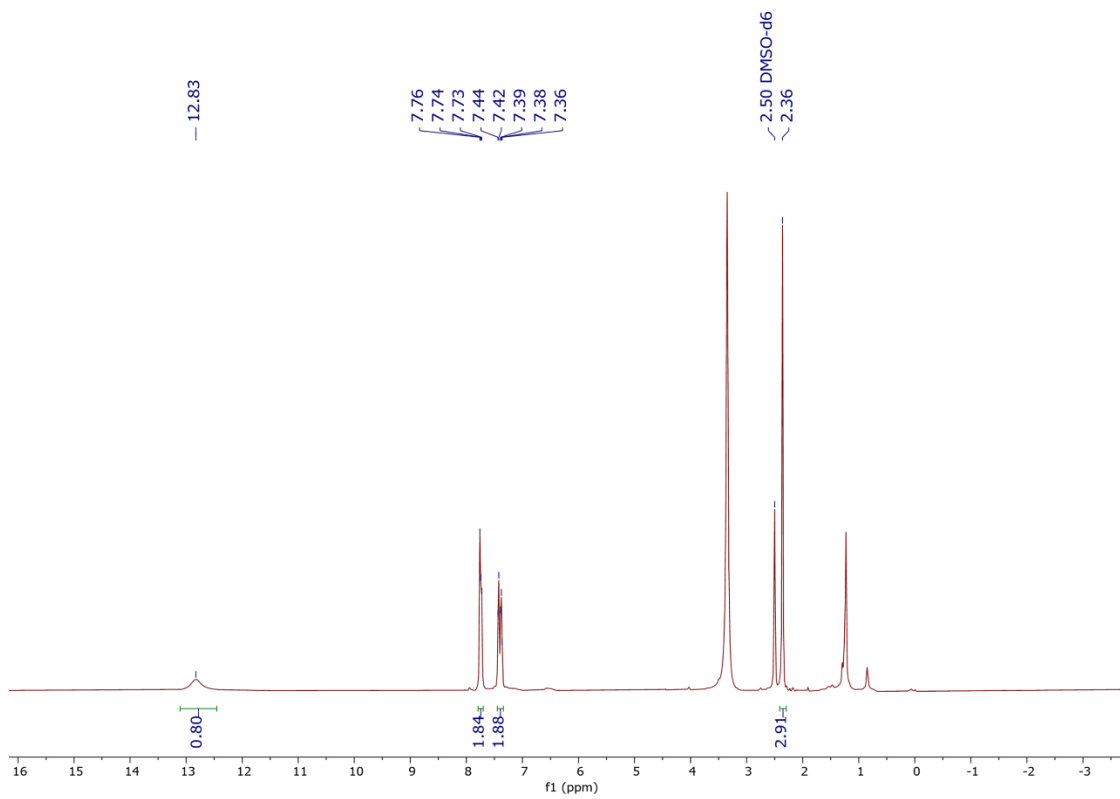

Figure S50.  $^1\text{H}$  NMR of m-methyl benzoic acid

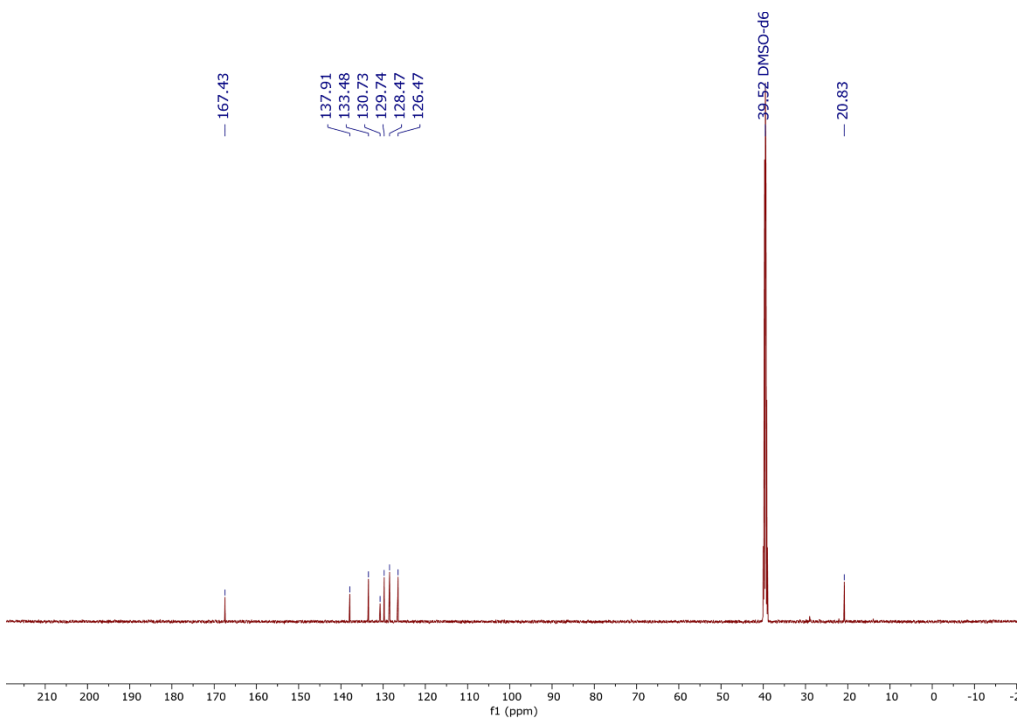

Figure S51.  $^{13}\text{C}\{^1\text{H}\}$  NMR of m-methyl benzoic acid

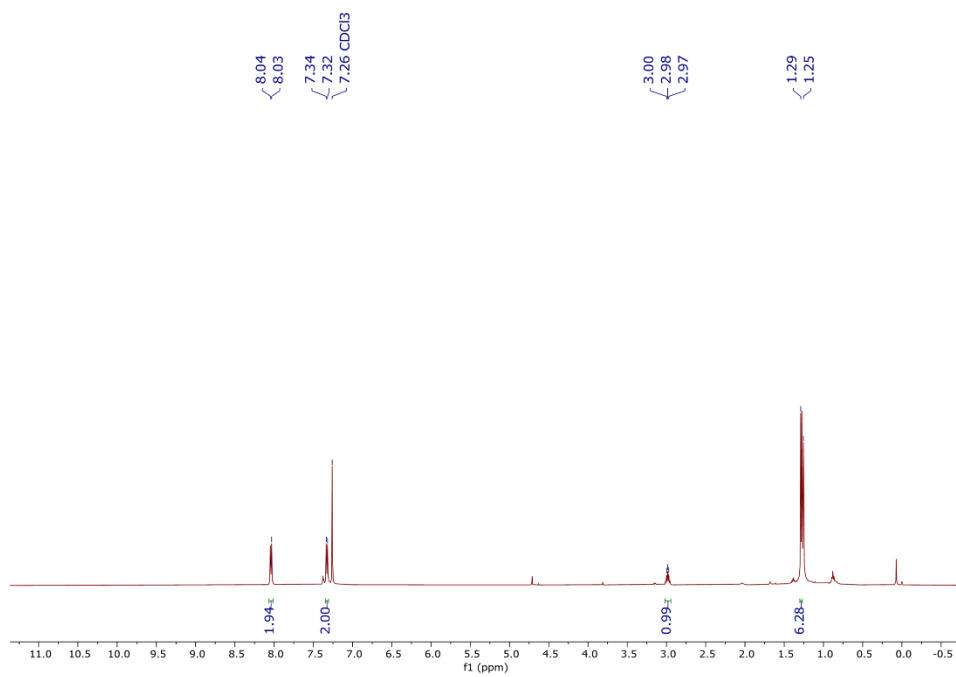

Figure S52. <sup>1</sup>H NMR of *p*-isopropyl benzoic acid

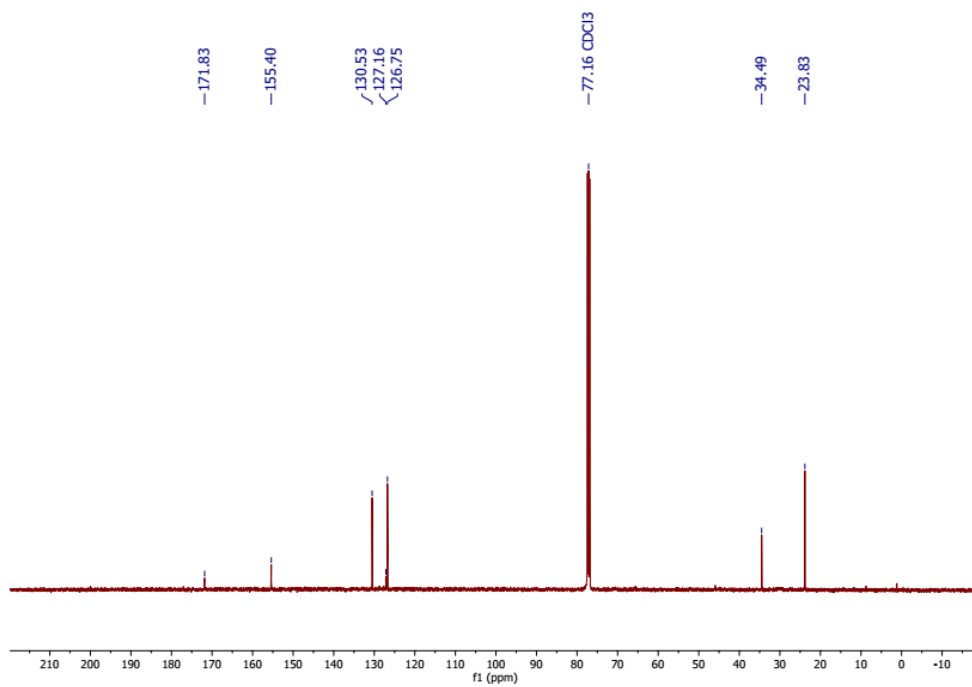

Figure S53. <sup>13</sup>C {<sup>1</sup>H} NMR of *p*-isopropyl benzoic acid

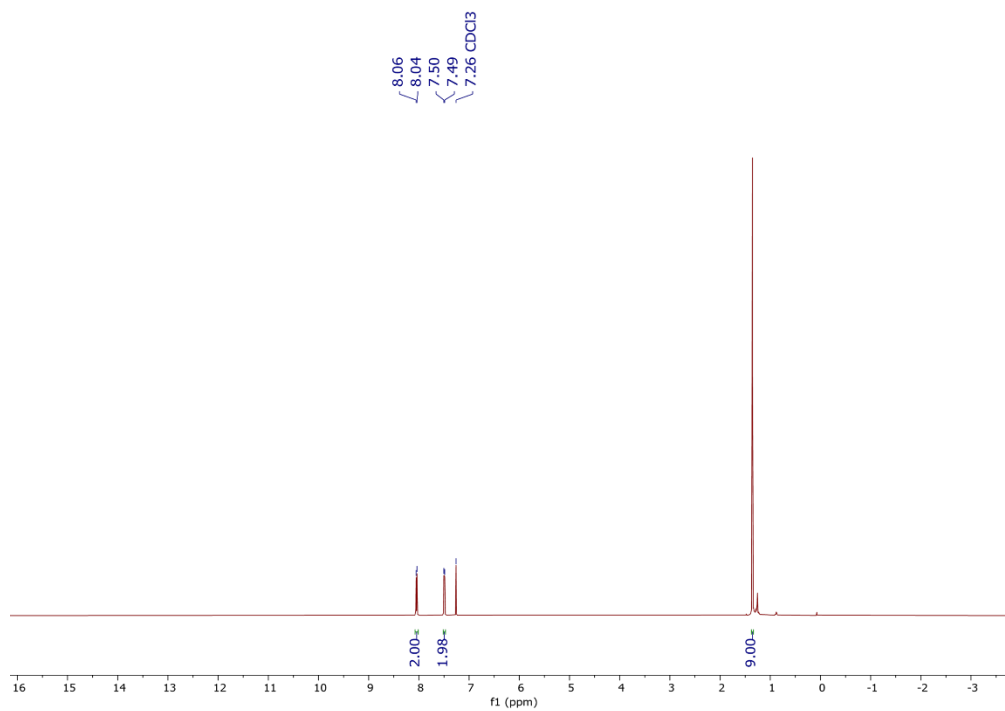

Figure S54.  $^1\text{H}$  NMR of *p*-*tert*butyl benzoic acid

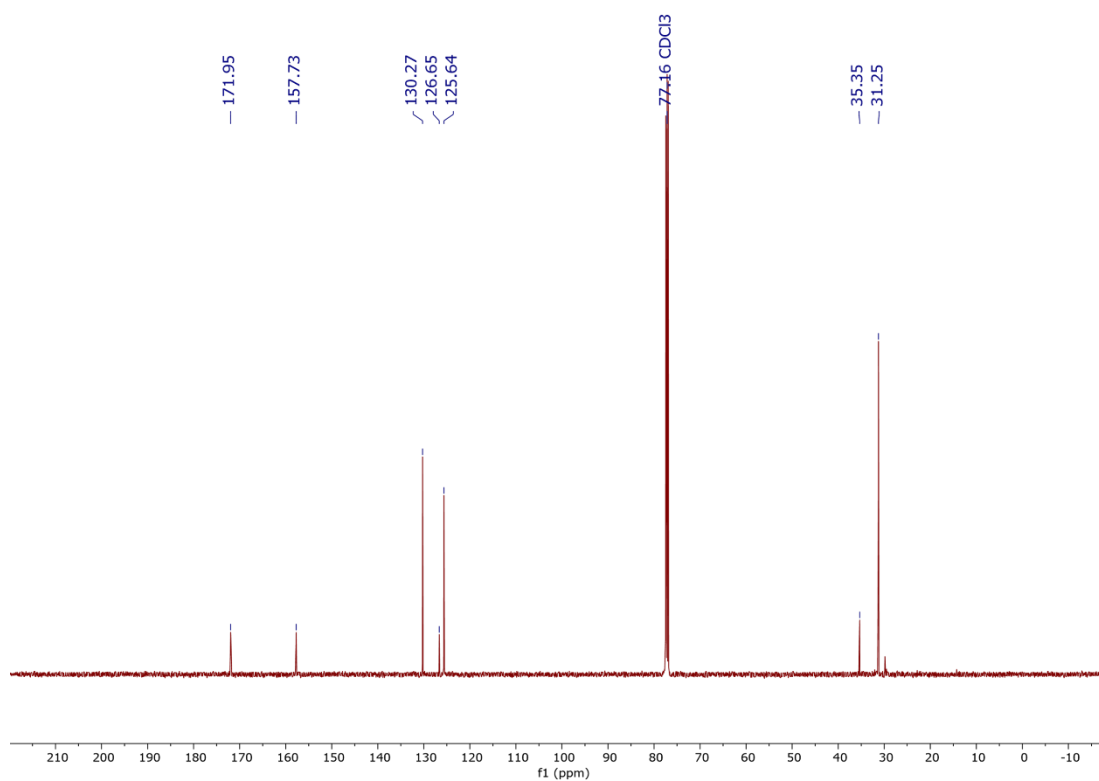

Figure S55.  $^{13}\text{C}\{^1\text{H}\}$  NMR of *p*-*tert*butyl benzoic acid



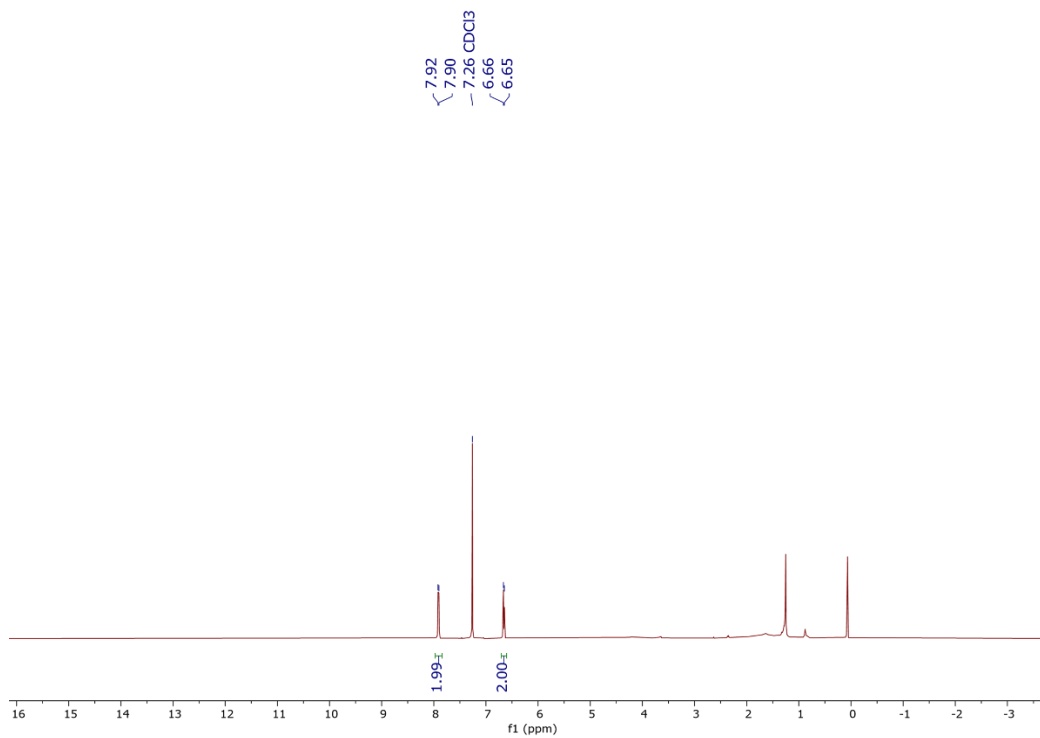

Figure S56.  $^1\text{H}$  NMR of p-amino benzoic acid

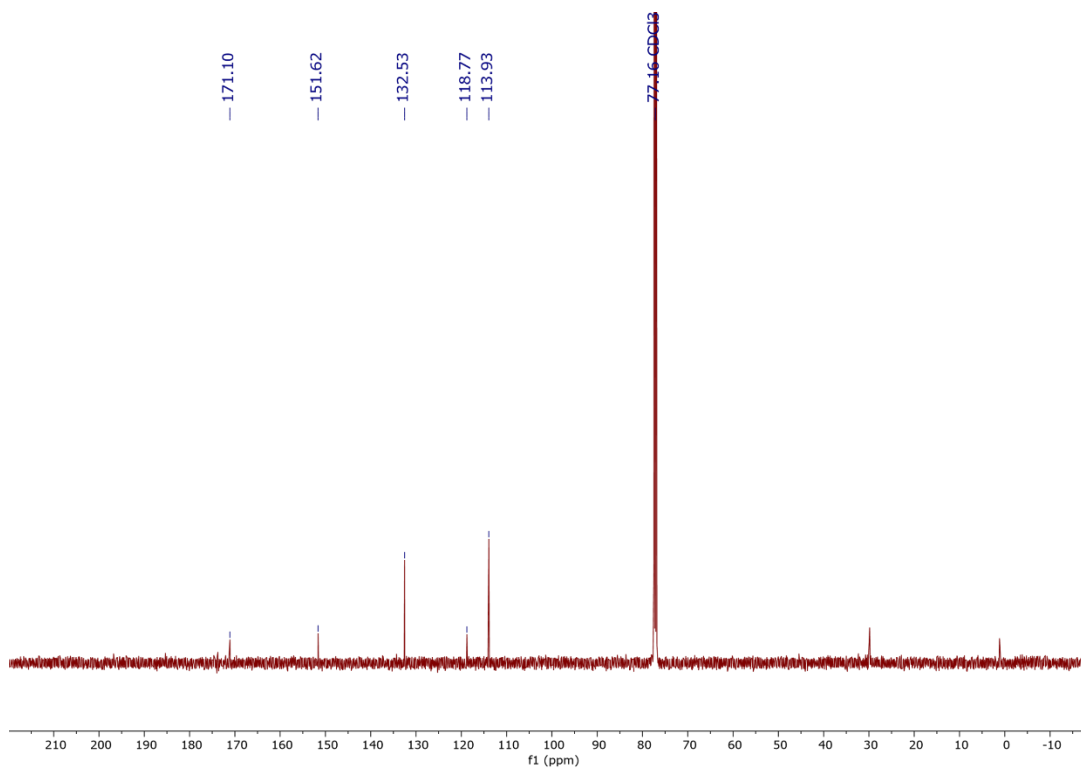

Figure S57.  $^{13}\text{C}\{^1\text{H}\}$  NMR of p-amino benzoic acid

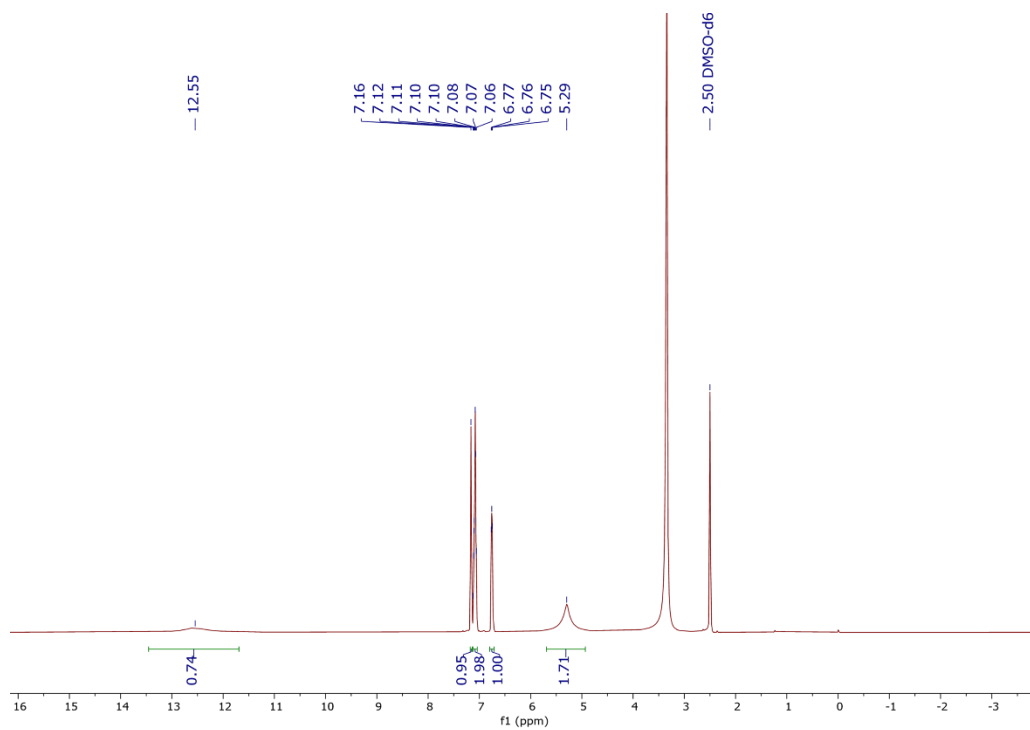

Figure S58.  $^1\text{H}$  NMR of m-amino benzoic acid

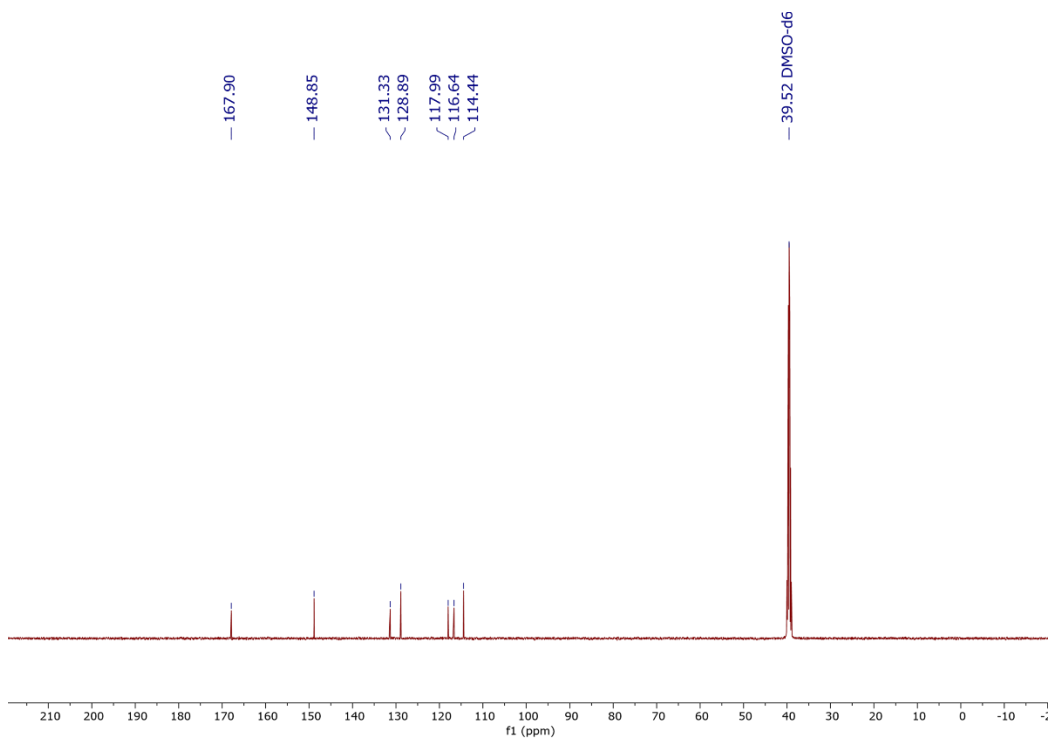

Figure S59.  $^{13}\text{C}\{^1\text{H}\}$  NMR of m-amino benzoic acid

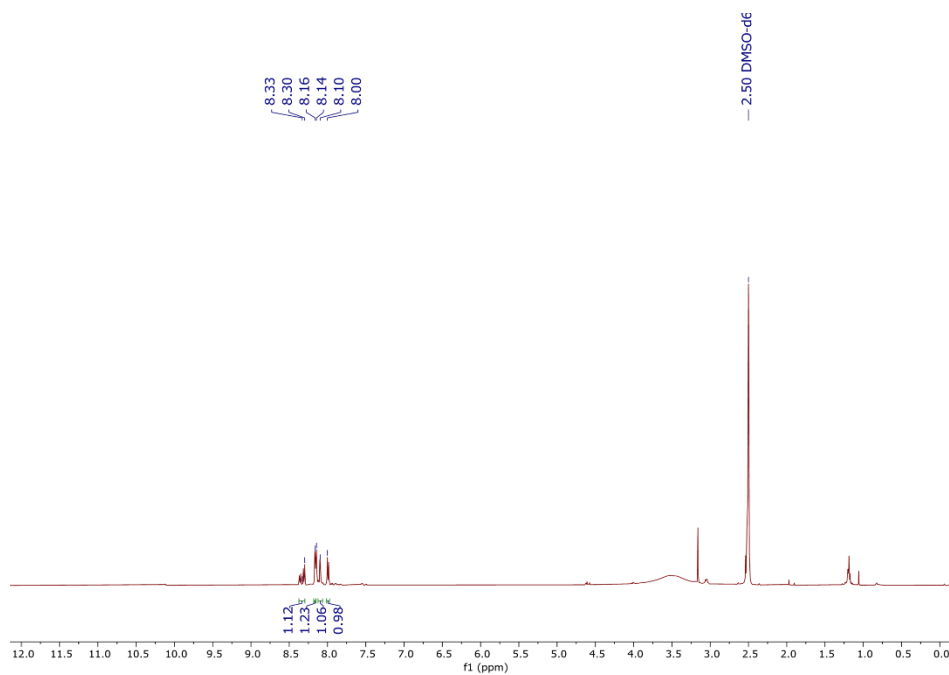

**Figure S60.**  $^1\text{H}$  NMR of m-nitro benzoic acid

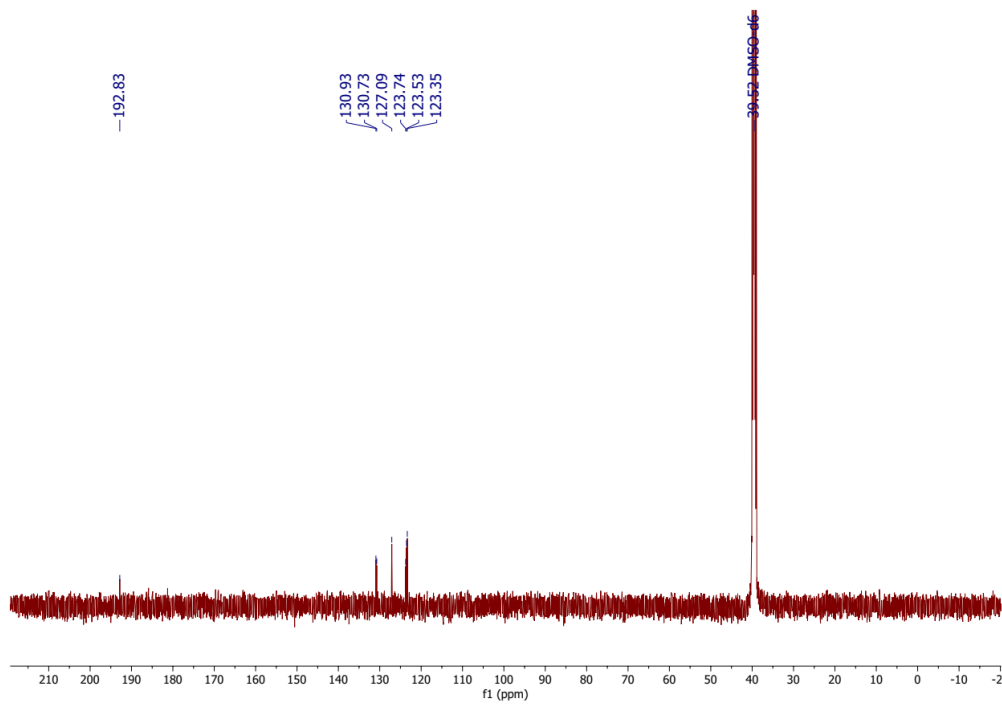

**Figure S61.**  $^{13}\text{C}\{^1\text{H}\}$  NMR of m-nitro benzoic acid

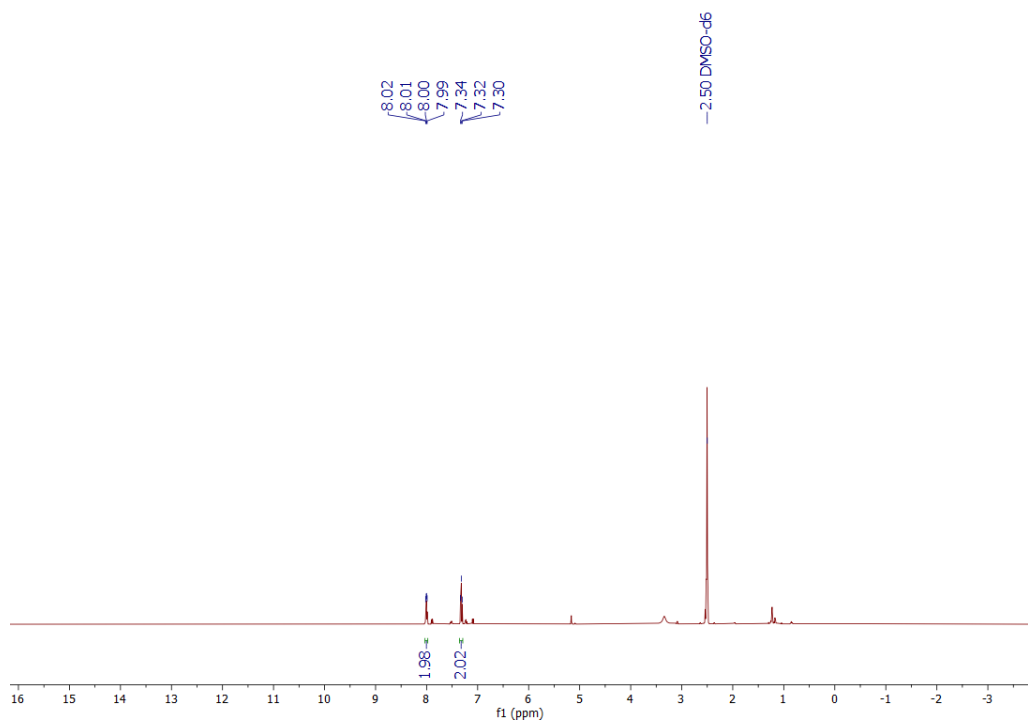

Figure S62.  $^1\text{H}$  NMR of p-fluoro benzoic acid

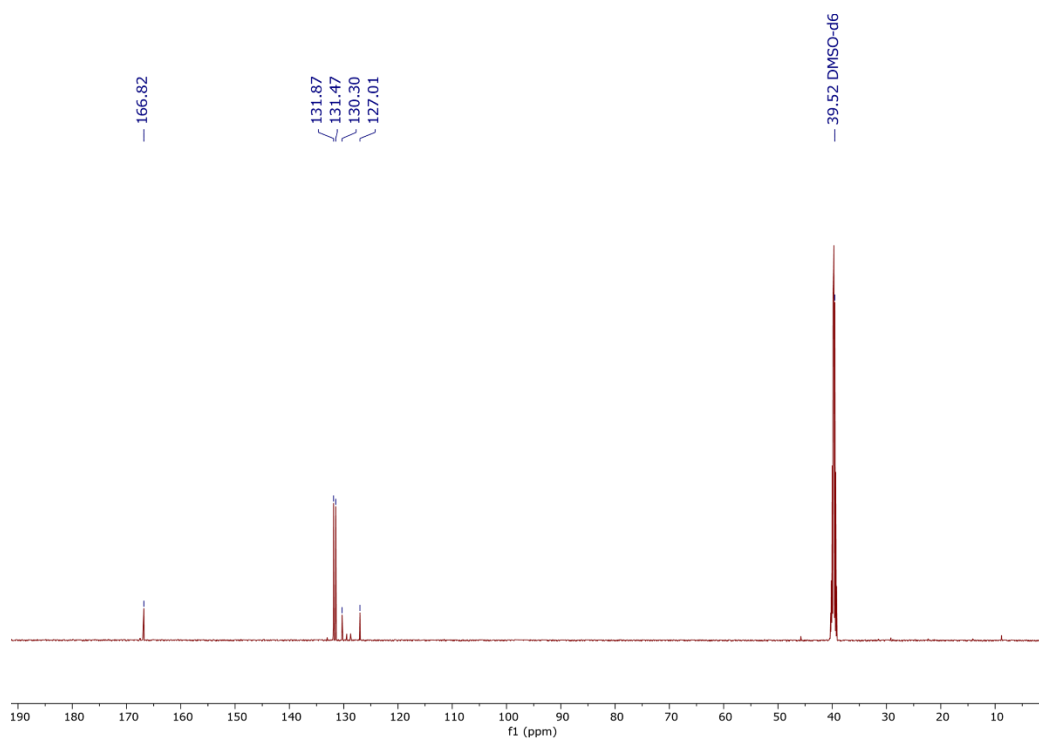

Figure S63.  $^{13}\text{C}\{^1\text{H}\}$  NMR of p-fluoro benzoic acid

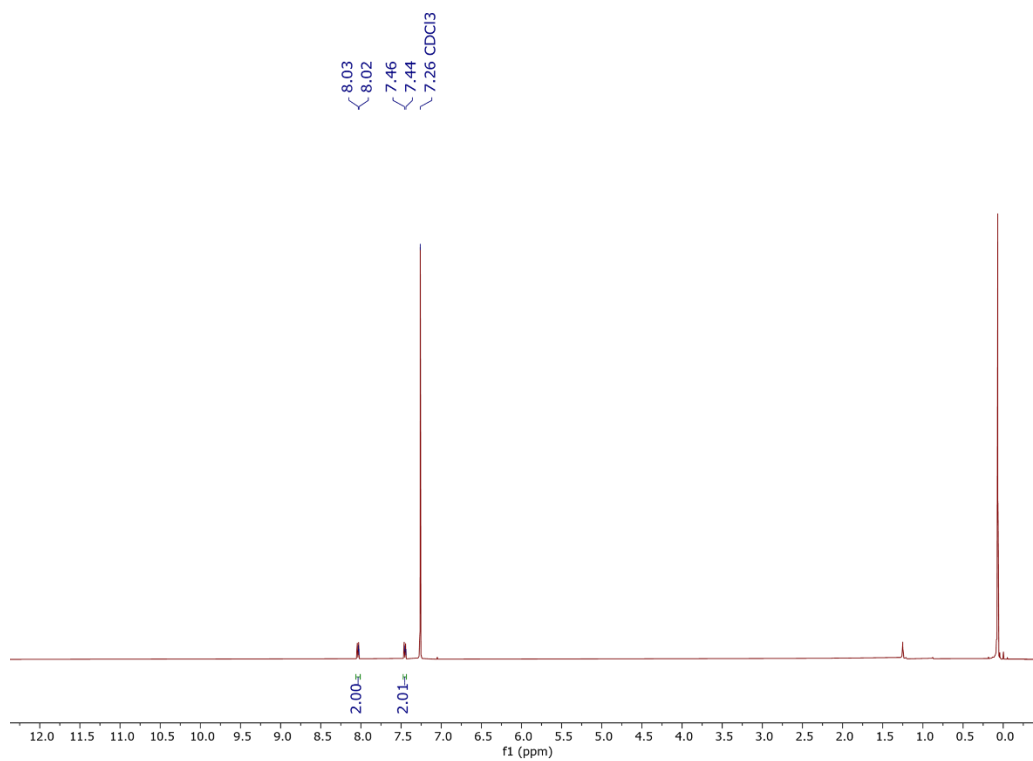

Figure S64.  $^1\text{H}$  NMR of p-chloro benzoic acid

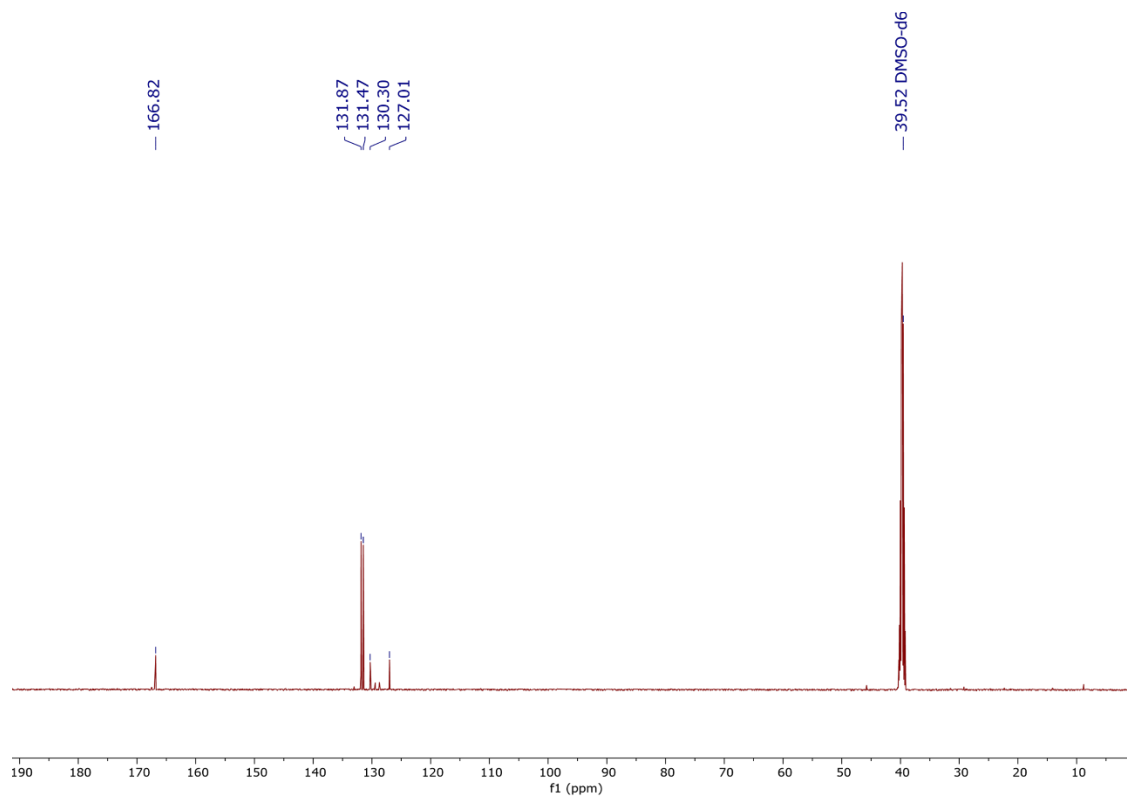

Figure S65.  $^{13}\text{C}\{^1\text{H}\}$  NMR of p-chloro benzoic acid

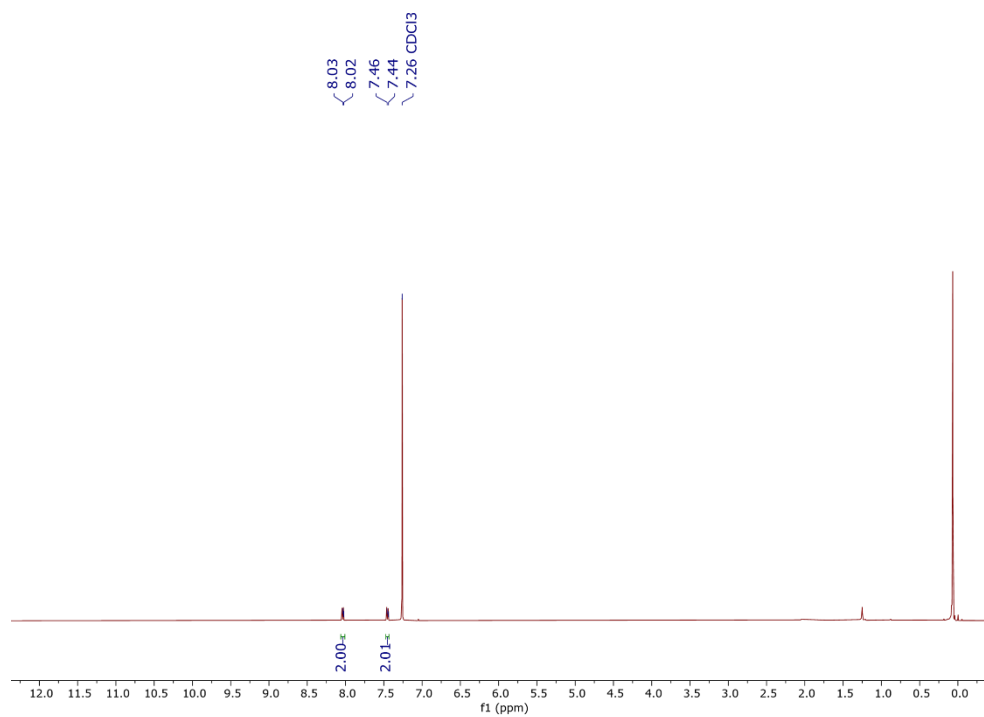

Figure S66.  $^1\text{H}$  NMR of p-iodo benzoic acid

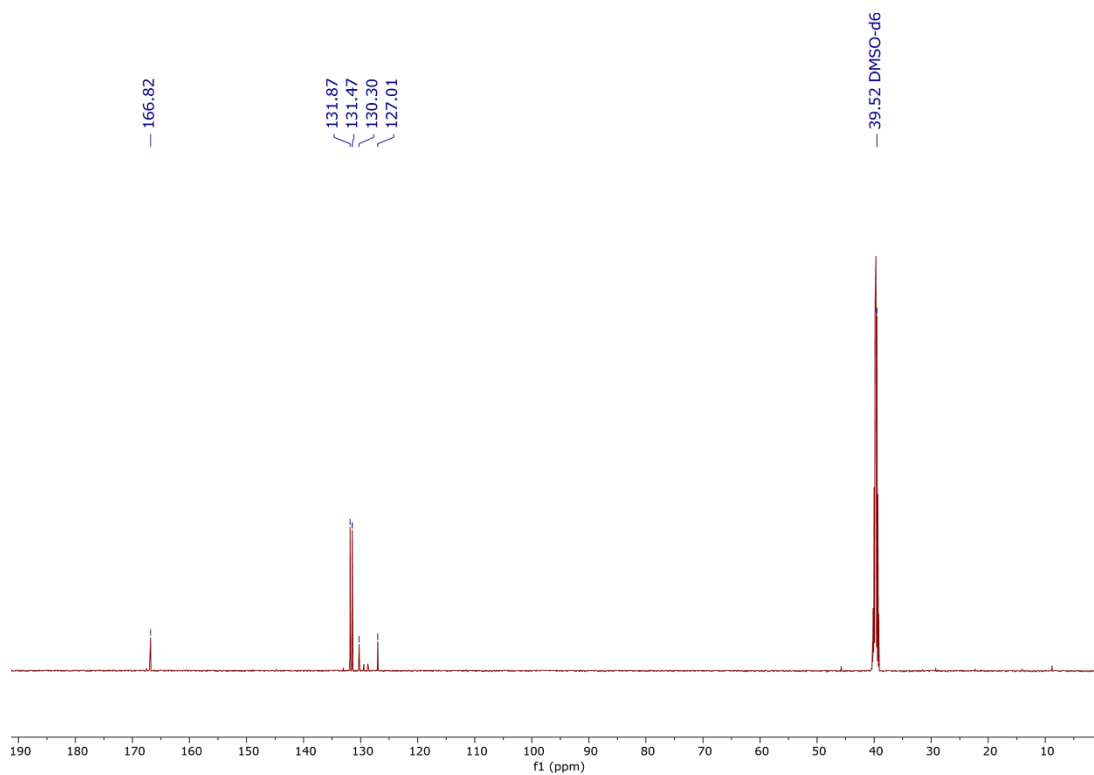

Figure S67.  $^{13}\text{C}\{^1\text{H}\}$  NMR of p-iodo benzoic acid

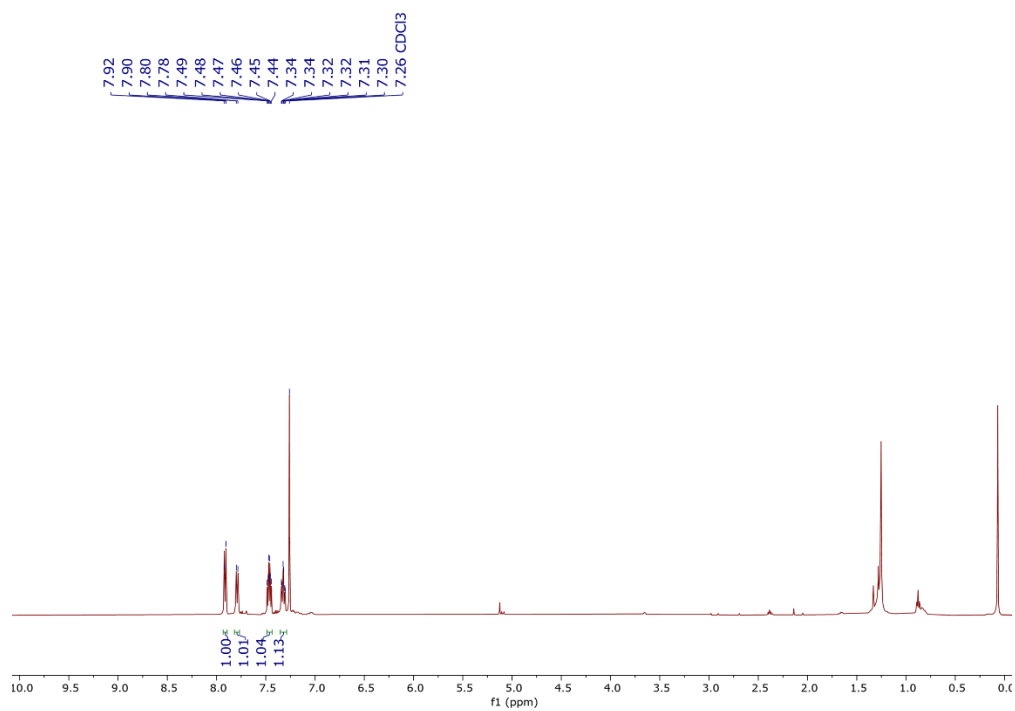

Figure S68.  $^1\text{H}$  NMR of m-fluoro benzoic acid

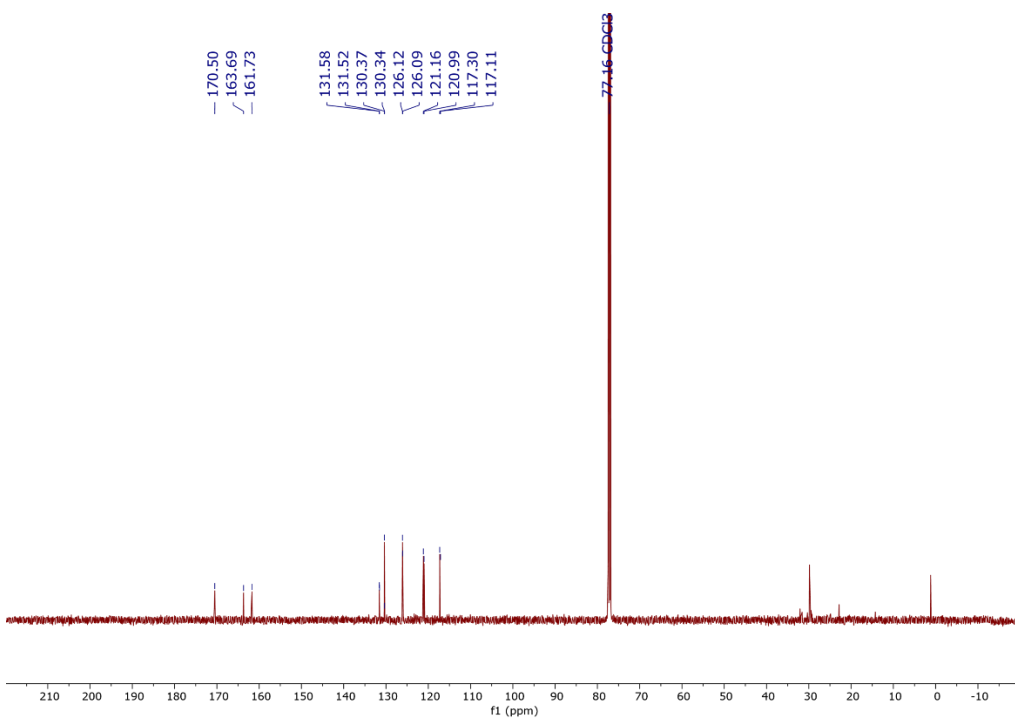

Figure S69.  $^{13}\text{C}\{^1\text{H}\}$  NMR of m-fluoro benzoic acid

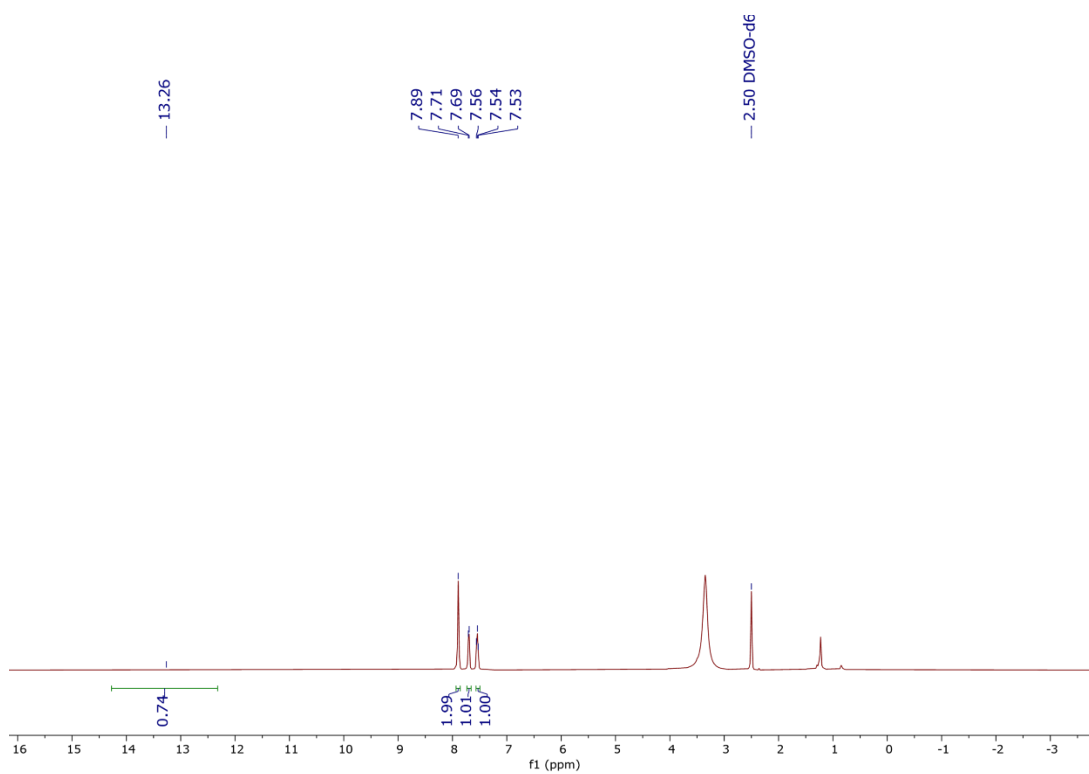

Figure S70.  $^1\text{H}$  NMR of m-chloro benzoic acid

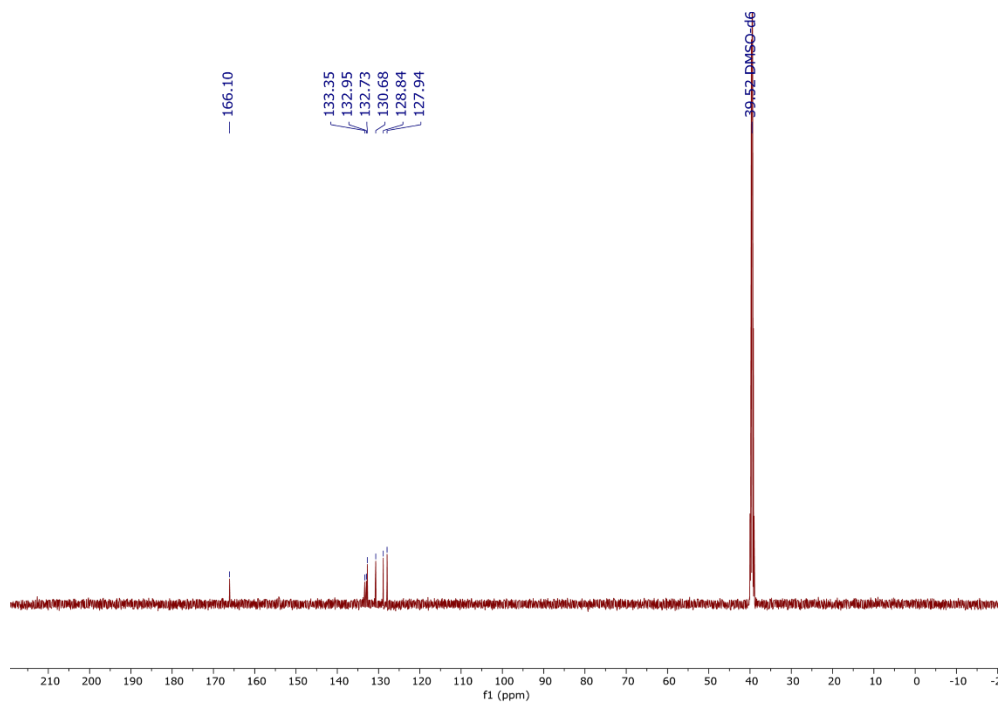



**Figure S71.**  $^{13}\text{C}\{^1\text{H}\}$  NMR of m-chloro benzoic acid

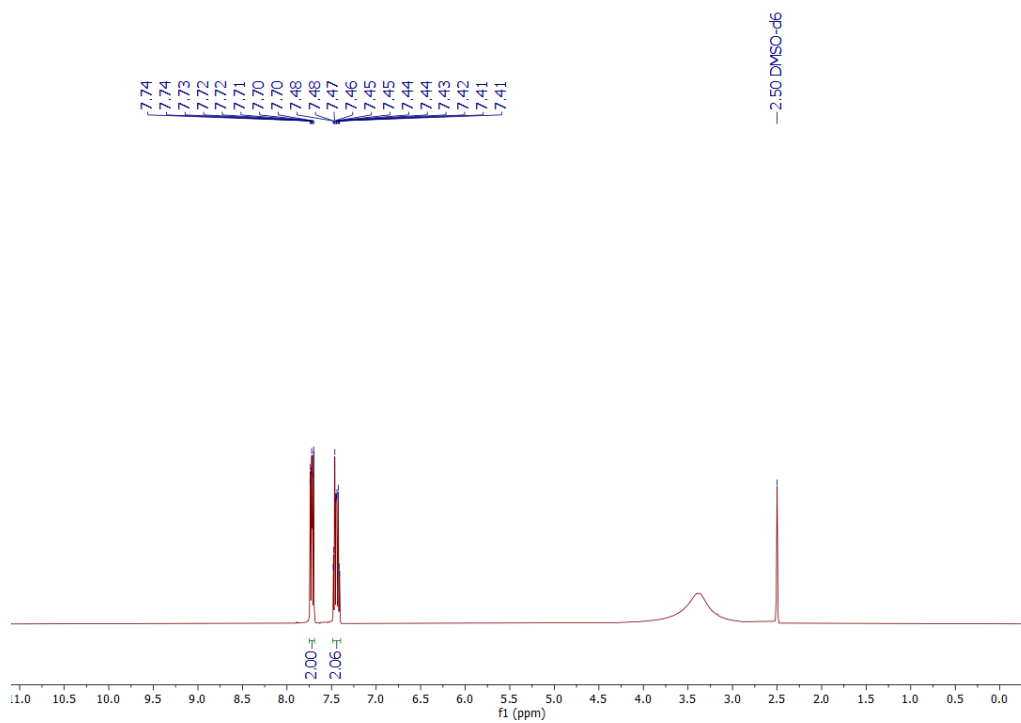

**Figure S72.**  $^1\text{H}$  NMR of o-bromo benzoic acid

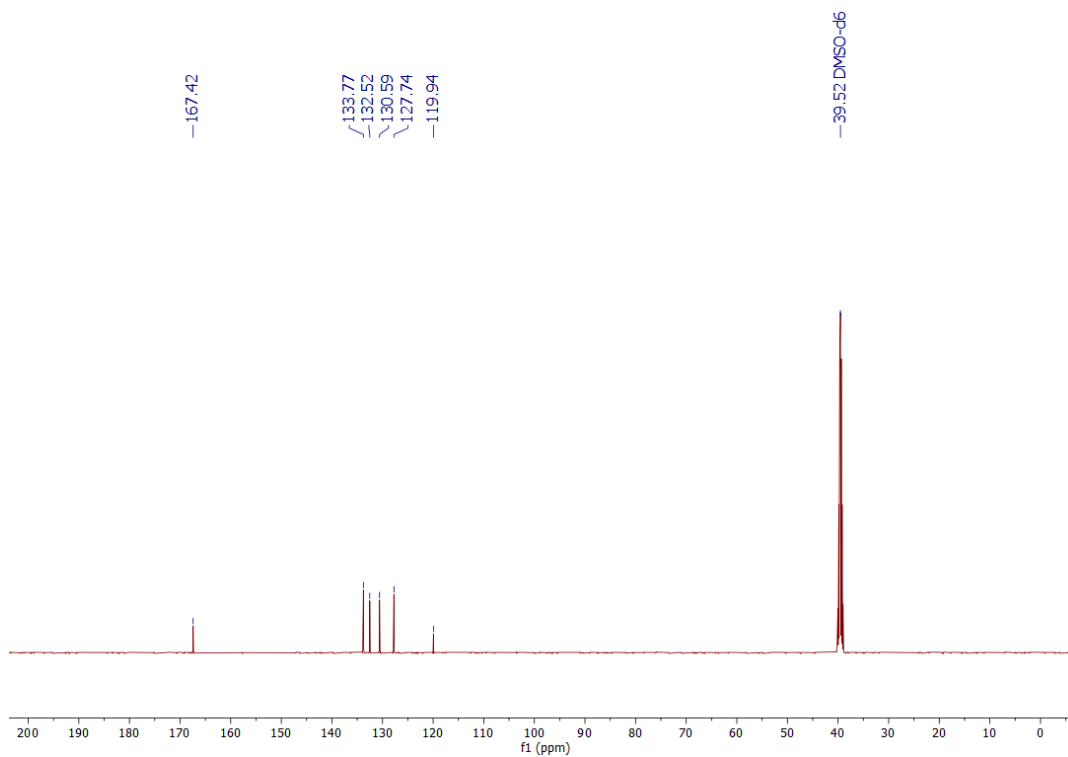

**Figure S73.**  $^{13}\text{C}\{^1\text{H}\}$  NMR of o-bromo benzoic acid

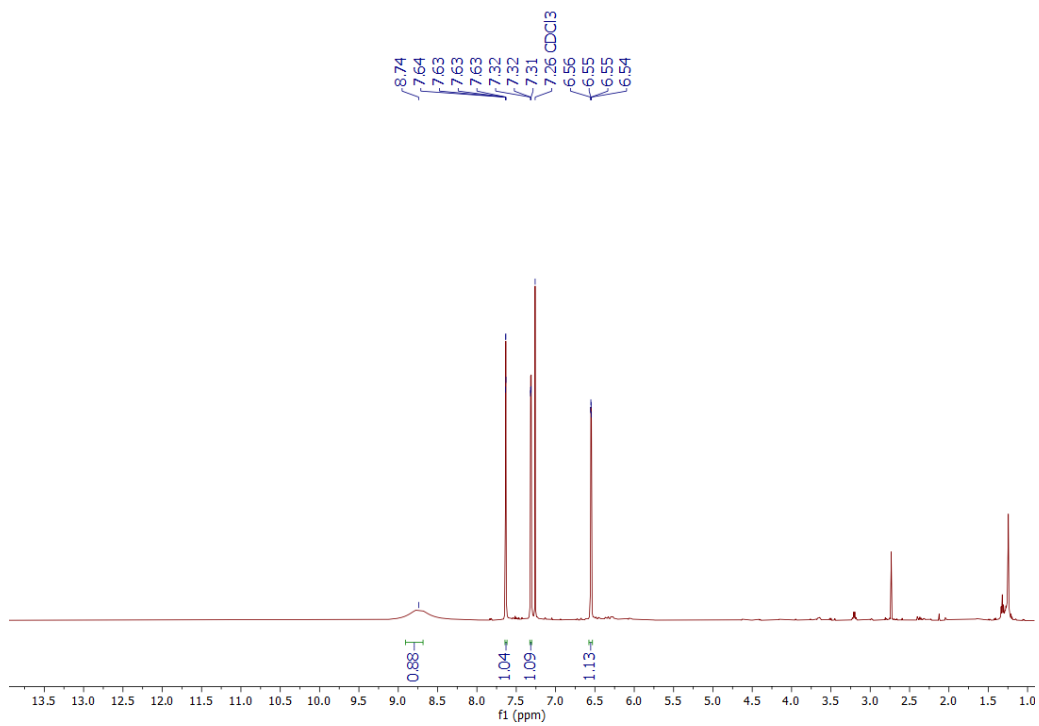

**Figure S74.**  $^1\text{H}$  NMR of furan-2-carboxylic acid

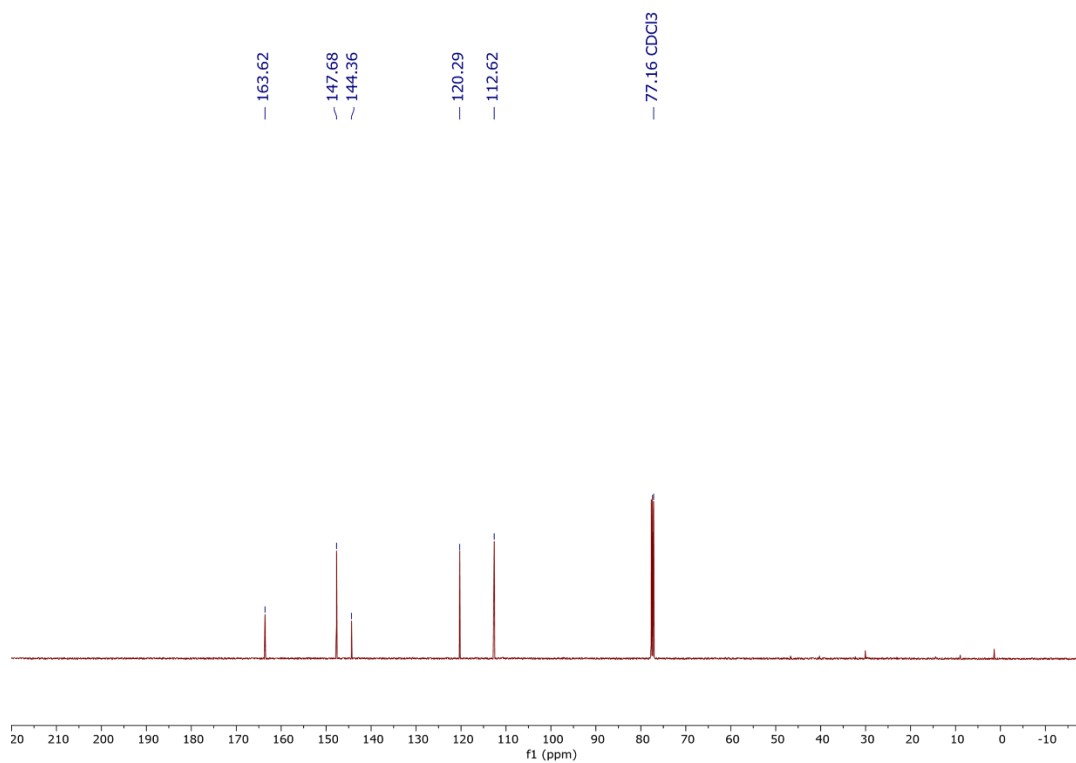

**Figure S75.**  $^{13}\text{C}\{^1\text{H}\}$  NMR of furan-2-carboxylic acid

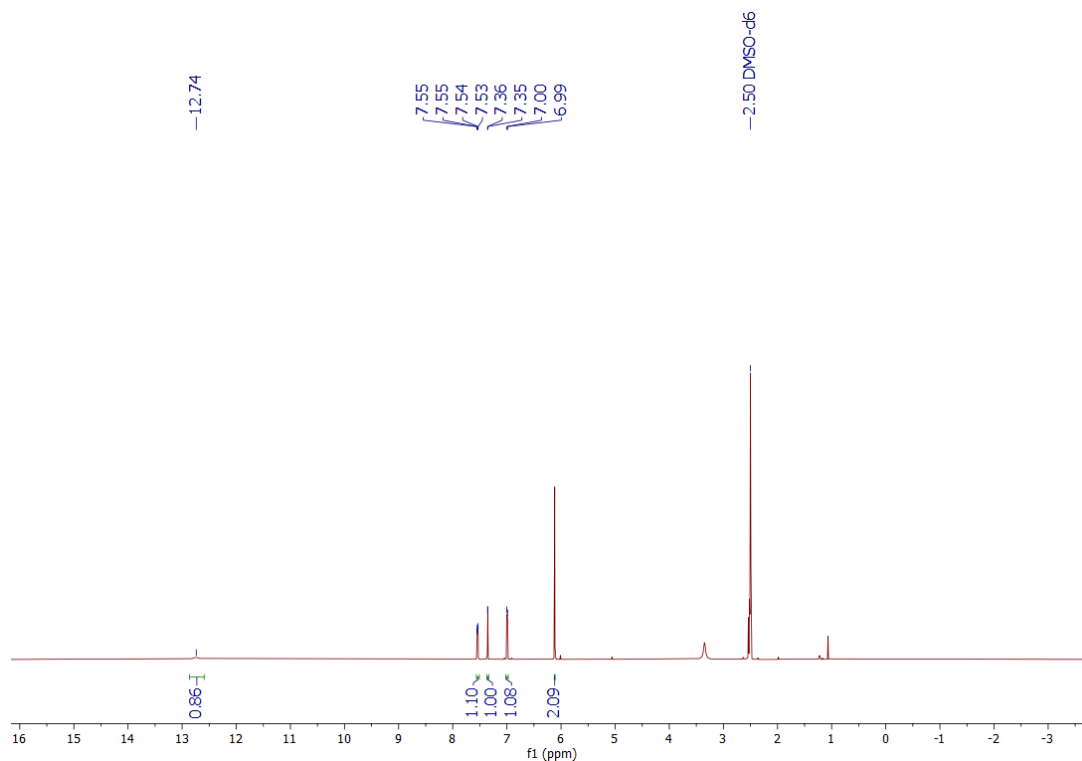

Figure S76.  $^1\text{H}$  NMR of benzo[d][1,3]dioxole-5-carboxylic acid

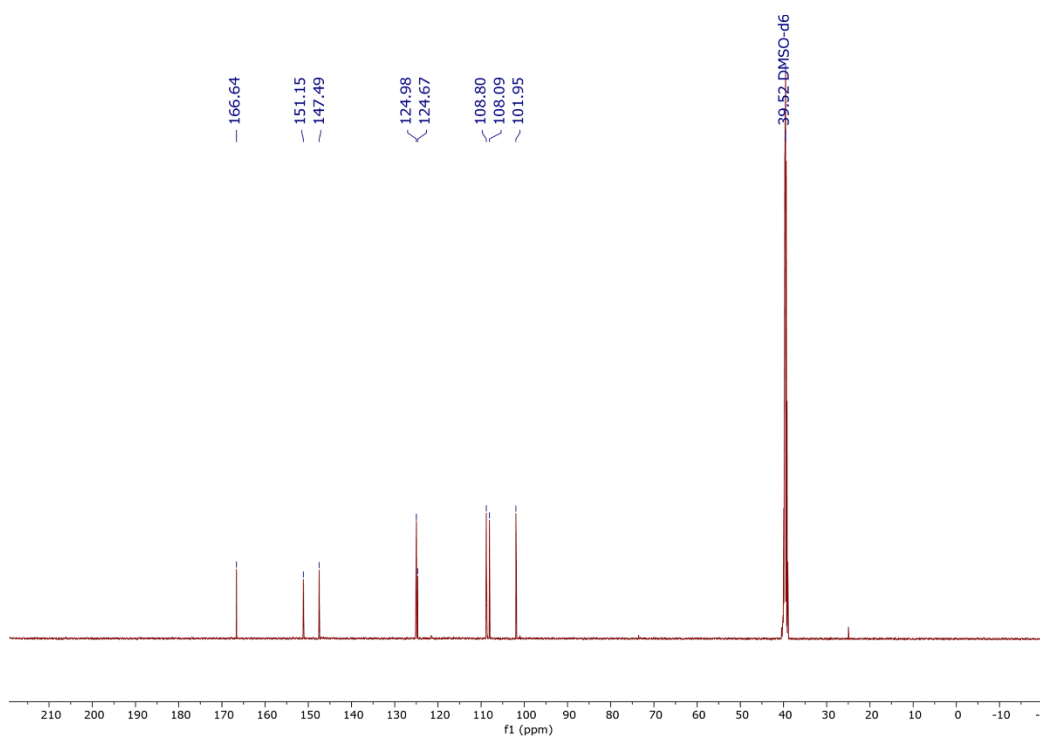

Figure S77.  $^{13}\text{C}\{^1\text{H}\}$  NMR of benzo[d][1,3]dioxole-5-carboxylic acid

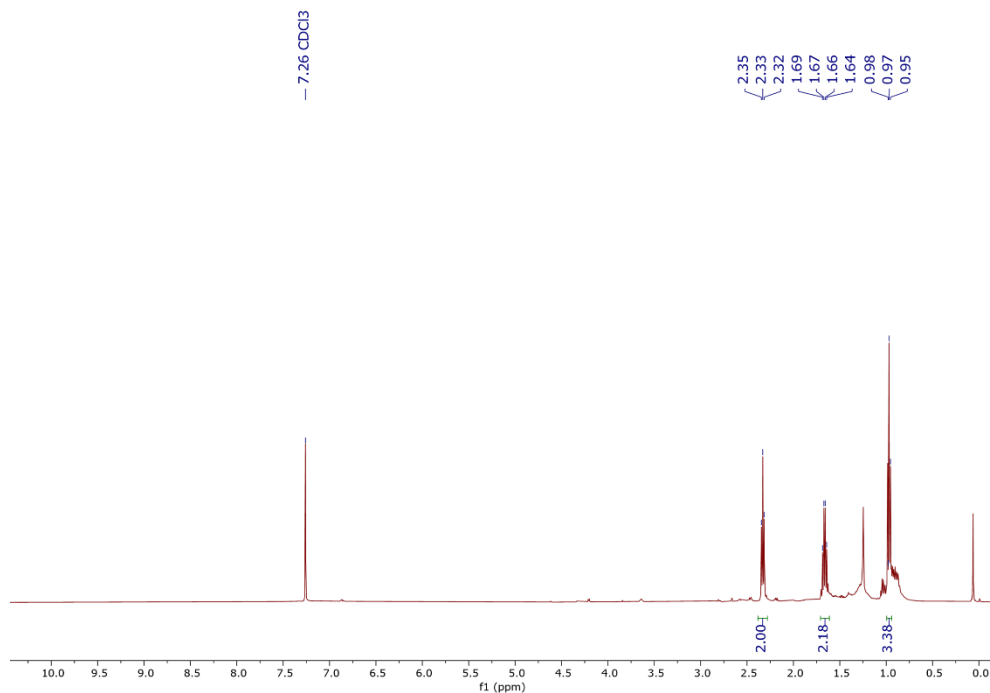

**Figure S78.** <sup>1</sup>H NMR of butyric acid

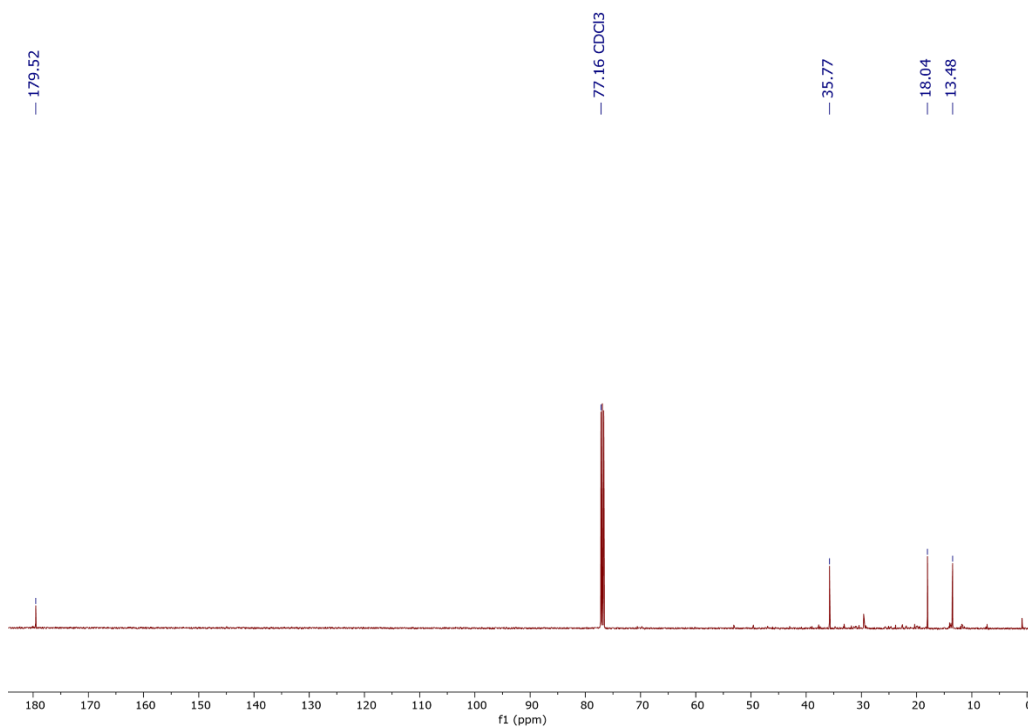

**Figure S79.** <sup>13</sup>C{<sup>1</sup>H} NMR of butyric acid
